# Supplementary material for: Evolutionary rewiring of the wheat transcriptional regulatory network by lineage-specific transposable elements
Source: HighWire-hosted journal article supplement (doi:10.1101/gr.275658.121), 2021-09-09
Supplement: Supplemental_Table_S1.xlsx [file Supplemental_Table_S1.xlsx]

## Sheet: sheet1
	Supplemental Table S1. List of abiotic/ABA-related TFs selected based on different sources of evidence. 107 TFs potentially responsive to environmental stimuli were collected based on publications, including TFs previously confirmed to be involved in abiotic stress responses in T. aestivum, the model dicotyledonous plant Arabidopsis thaliana, and the model monocotyledonous plant Oryza sativa. The…
	Family	Name	Gene ID	sources of evidence
				ortholog from A. thaliana, O. sativa, T. aestivum	reference	ABA-induced expression	Cold-induced expression	Drought-induced expression	Heat-induced expression	Salt-induced expression	Wounding-induced expression
1	AP2/ERF	AP2-DREB-1	TuG1812G0100002595			log2fc=1.82;P=4.58e-04					log2fc=1.44;P=3.30e-02
2	AP2/ERF	AP2-DREB-18	TuG1812G0500003596				log2fc=7.09;P=2.31e-10
3	AP2/ERF	AP2-DREB-19	TuG1812G0500003597				log2fc=9.25;P=7.76e-11
4	AP2/ERF	AP2-DREB-21	TuG1812G0600002849				log2fc=6.97;P=1.42e-36				log2fc=3.33;P=3.21e-05
5	AP2/ERF	AP2-DREB-7	TuG1812G0600002854	AT4G25470|AT4G25480|AT4G25490|AT5G51990	doi: 10.1073/pnas.0705639105		log2fc=7.71;P=6.02e-06
6	AP2/ERF	AP2-DREB-8	TuG1812G0700001303	AT1G46768	doi: 10.1186/1471-2229-10-47	log2fc=1.09;P=5.91e-03	log2fc=1.50;P=4.58e-05		log2fc=1.35;P=1.42e-04		log2fc=1.45;P=1.12e-05
7	AP2/ERF	AP2-DREB-9	TuG1812S0003082000	AT2G40340|LOC_Os01g07120|TraesCS3A02G099200|TraesCS3A02G099200	doi:10.1104/pp.110.154617 | doi:10.1371/journal.pone.0083011 | doi:10.1007/s00438-008-0382-x
8	AP2/ERF	AP2-ERF-13	TuG1812G0200003244	AT1G43160|AT5G13330	doi: 10.1007/s11103-010-9711-7						log2fc=5.95;P=1.01e-09
9	AP2/ERF	AP2-ERF-23	TuG1812G0600003427				log2fc=7.15;P=1.59e-26				log2fc=4.45;P=2.80e-08
10	AP2/ERF	AP2-RAV-26	TuG1812G0100004108			log2fc=1.50;P=1.23e-03	log2fc=2.55;P=9.75e-06		log2fc=1.40;P=4.81e-03		log2fc=1.90;P=3.82e-05
11	AP2/ERF	AP2-14	TuG1812G0200003740	TraesCS1A02G221900|TraesCS1B02G235100|TraesCS1D02G223600	doi:10.1266/ggs.81.77				log2fc=5.74;P=5.04e-03	log2fc=5.04;P=2.08e-02
12	AP2/ERF	AP2-15	TuG1812G0500003417				log2fc=3.38;P=2.74e-05
13	B3	B3-10	TuG1812G0400003550			log2fc=1.06;P=2.24e-03
14	bHLH	bHLH10	TuG1812G0300001879	AT2G46510	doi: 10.1007/s11103-007-9230-3
15	bHLH	bHLH11	TuG1812G0400003187	AT2G46510	doi: 10.1007/s11103-007-9230-3
16	bHLH	bHLH12	TuG1812S0000478700			log2fc=2.13;P=2.53e-05
17	bHLH	bHLH13	TuG1812S0000800700	AT5G43650	doi: 10.1007/s00438-009-0481-3		log2fc=5.00;P=3.52e-02				log2fc=4.97;P=5.23e-07
18	bHLH	bHLH14	TuG1812G0200003026			log2fc=1.96;P=2.73e-11
19	bHLH	bHLH16	TuG1812G0300001692			log2fc=1.31;P=4.67e-03		log2fc=2.27;P=2.36e-02	log2fc=3.53;P=5.76e-11		log2fc=2.48;P=7.43e-05
20	bHLH	bHLH2	TuG1812G0400002825			log2fc=2.16;P=2.02e-07
21	bHLH	bHLH5	TuG1812G0600003399			log2fc=4.85;P=5.08e-07			log2fc=8.56;P=5.20e-08		log2fc=5.89;P=3.99e-03
22	bHLH	bHLH7	TuG1812S0003182700			log2fc=2.89;P=4.51e-06
23	bZIP	bZIP1	TuG1812G0300004147	LOC_Os01g64730	doi: 10.1007/s11103-009-9592-9	log2fc=1.18;P=1.60e-04		log2fc=1.86;P=2.36e-02	log2fc=2.86;P=2.77e-11		log2fc=1.24;P=2.39e-02
24	bZIP	bZIP10	TuG1812G0500000268	AT3G51960	doi: 10.1016/j.gene.2009.02.010
25	bZIP	bZIP11	TuG1812G0500001629	AT2G41070|AT3G56850	doi: 10.1105/tpc.000869
26	bZIP	bZIP17	TuG1812S0000210200	AT3G51960	doi: 10.1016/j.gene.2009.02.010
27	bZIP	bZIP2	TuG1812G0300003789	AT2G41070|AT3G56850	doi: 10.1105/tpc.000869
28	bZIP	bZIP20	TuG1812G0300003752			log2fc=2.13;P=2.59e-03
29	bZIP	bZIP3	TuG1812G0700001801	LOC_Os02g52780|LOC_Os06g10880	doi: 10.1104/pp.108.128199 | doi:10.1016/j.jplph.2010.05.008						log2fc=2.81;P=3.09e-09
30	bZIP	bZIP4	TuG1812G0600003557	LOC_Os02g52780|LOC_Os06g10880	doi: 10.1104/pp.108.128199 | doi:10.1016/j.jplph.2010.05.008				log2fc=2.41;P=6.88e-20	log2fc=1.13;P=2.97e-02	log2fc=2.17;P=1.26e-17
31	bZIP	bZIP5	TuG1812G0100004474				log2fc=1.90;P=2.87e-08
32	bZIP	bZIP7	TuG1812G0100000903	TraesCS1A02G072600|TraesCS1B02G091500|TraesCS1D02G075500	doi: 10.1093/jxb/ern014		log2fc=1.89;P=1.67e-10		log2fc=1.34;P=6.53e-06		log2fc=1.02;P=6.36e-04
33	bZIP	bZIP8	TuG1812G0100003446	AT2G41070|AT3G56850	doi: 10.1105/tpc.000869
34	C2C2	C2C2-1	TuG1812G0100003142			log2fc=3.03;P=2.23e-03
35	C2C2	C2C2-2	TuG1812G0300003387			log2fc=1.97;P=1.28e-03	log2fc=3.07;P=1.23e-02
36	C2C2	C2C2-3	TuG1812G0300005814			log2fc=10.36;P=4.99e-11
37	C2C2	C2C2-4	TuG1812G0600002334			log2fc=2.51;P=8.70e-04			log2fc=1.70;P=3.61e-02
38	C2C2	C2C2-5	TuG1812G0700003983			log2fc=1.85;P=5.51e-05		log2fc=1.01;P=9.27e-04
39	C2H2	C2H2-4	TuG1812G0500000826	AT3G19580|LOC_Os12g39400	doi: 10.1016/s0378-1119(00)00133-5 | doi:10.1016/j.febslet.2008.02.052
40	C3H	C3H-1	TuG1812G0100003866			log2fc=2.38;P=4.25e-03
41	C3H	C3H-2	TuG1812G0300001199	LOC_Os05g10670	doi:10.1104/pp.112.205385	log2fc=2.01;P=1.36e-12
42	C3H	C3H-5	TuG1812G0500002282			log2fc=2.20;P=1.26e-03
43	GARP	GARP2	TuG1812G0200001190			log2fc=1.90;P=1.72e-04	log2fc=2.01;P=2.20e-03
44	GARP	GARP5	TuG1812G0100002985			log2fc=1.17;P=5.02e-04					log2fc=1.52;P=9.42e-06
45	GARP	GARP6	TuG1812G0200002952			log2fc=1.55;P=2.40e-07
46	GARP-G2	GARP-G2-1	TuG1812G0400000684			log2fc=5.86;P=5.54e-03
47	GRAS	GRAS2	TuG1812G0500001723			log2fc=2.01;P=2.35e-06			log2fc=1.66;P=2.00e-03
48	HB-HD-ZIP	HB-HD-ZIP-2	TuG1812G0600002697			log2fc=1.17;P=5.12e-04		log2fc=3.72;P=3.44e-02	log2fc=5.69;P=5.52e-17		log2fc=6.84;P=1.87e-26
49	HB-HD-ZIP	HB-HD-ZIP-3	TuG1812G0200004657			log2fc=6.33;P=1.11e-03
50	HB-HD-ZIP	HB-HD-ZIP-6	TuG1812G0400003421			log2fc=1.23;P=2.17e-05	log2fc=1.95;P=9.64e-07				log2fc=1.01;P=1.61e-02
51	HSF	HSF1	TuG1812G0100004102						log2fc=3.88;P=2.18e-20		log2fc=1.46;P=3.04e-03
52	LOB	LOB2	TuG1812G0200001969			log2fc=1.64;P=1.50e-03	log2fc=2.15;P=1.94e-06	log2fc=2.30;P=8.93e-04	log2fc=2.26;P=2.51e-08		log2fc=1.93;P=2.58e-05
53	LOB	LOB3	TuG1812G0200003217			log2fc=6.64;P=3.34e-04
54	LOB	LOB5	TuG1812G0500005367			log2fc=9.93;P=7.79e-11
55	MYB	MYB11	TuG1812S0002419800	LOC_Os01g62410|TraesCS3A02G359200|TraesCS3B02G391900|TraesCS3D02G353500	doi: 10.1104/pp.106.094532 | doi:10.1093/jxb/err264
56	MYB	MYB12	TuG1812G0100002586	TraesCS1A02G218800|TraesCS1B02G232300|TraesCS1D02G220500	doi: 10.1093/jxb/err264
57	MYB	MYB13	TuG1812G0100003467	TraesCS1A02G308100|TraesCS1B02G318800|TraesCS1D02G307500	doi: 10.1093/jxb/err264
58	MYB	MYB14	TuG1812G0200003916	TraesCS2A02G320100|TraesCS2B02G363200|TraesCS2D02G343200	doi: 10.1093/jxb/err264
59	MYB	MYB15	TuG1812G0300004484	TraesCS3A02G414100|TraesCS3B02G448900|TraesCS3D02G408600	doi: 10.1093/jxb/err264
60	MYB	MYB16	TuG1812G0300000594	TraesCS3A02G056000|TraesCS3B02G068800|TraesCS3D02G056100	doi: 10.1093/jxb/err264
61	MYB	MYB17	TuG1812G0300005753	TraesCS3A02G528500|TraesCS3B02G597500|TraesCS3D02G533700	doi: 10.1093/jxb/err264
62	MYB	MYB18	TuG1812G0500003546	TraesCS5A02G329900|TraesCS5B02G330100|TraesCS5D02G335700	doi: 10.1093/jxb/err264	log2fc=1.05;P=3.64e-02			log2fc=2.12;P=5.37e-07
63	MYB	MYB19	TuG1812G0600001626	TraesCS6A02G155400|TraesCS6B02G183500|TraesCS6D02G145300	doi: 10.1093/jxb/err264
64	MYB	MYB2	TuG1812G0400001710			log2fc=2.00;P=9.29e-12		log2fc=1.05;P=4.06e-03
65	MYB	MYB20	TuG1812G0600002609	TraesCS6A02G224000|TraesCS6A02G224100|TraesCS6A02G224200|TraesCS6A02G224400|TraesCS6B02G257000|TraesCS6B02G257100|TraesCS6D02G210500|TraesCS6D02G211200	doi: 10.1007/s11033-012-1550-y				log2fc=3.24;P=1.97e-02		log2fc=6.12;P=2.87e-10
66	MYB	MYB21	TuG1812G0600002618	TraesCS6A02G224000|TraesCS6A02G224100|TraesCS6A02G224200|TraesCS6A02G224400|TraesCS6B02G257000|TraesCS6B02G257100|TraesCS6D02G210500|TraesCS6D02G211200	doi: 10.1007/s11033-012-1550-y
67	MYB	MYB22	TuG1812G0600002619	TraesCS6A02G224000|TraesCS6A02G224100|TraesCS6A02G224200|TraesCS6A02G224400|TraesCS6B02G257000|TraesCS6B02G257100|TraesCS6D02G210500|TraesCS6D02G211200	doi: 10.1007/s11033-012-1550-y						log2fc=3.75;P=2.47e-02
68	MYB	MYB23	TuG1812G0700000398	TraesCS4A02G452600|TraesCS7A02G036100|TraesCS7D02G032700	doi: 10.1093/jxb/err264
69	MYB	MYB24	TuG1812G0700005106	TraesCS7A02G470200	doi: 10.1093/jxb/err264			log2fc=2.19;P=4.71e-02			log2fc=2.62;P=3.89e-03
70	MYB	MYB26	TuG1812G0500001863	AT5G67300	doi: 10.1104/pp.107.110981		log2fc=3.02;P=2.26e-32		log2fc=1.89;P=4.92e-12		log2fc=2.25;P=2.84e-19
71	MYB	MYB27	TuG1812G0600001731	AT5G67300	doi: 10.1104/pp.107.110981	log2fc=1.95;P=2.18e-05	log2fc=4.77;P=5.41e-07		log2fc=2.69;P=2.95e-02		log2fc=5.48;P=1.68e-11
72	MYB	MYB30	TuG1812G0300001206			log2fc=1.04;P=2.35e-03
73	MYB	MYB31	TuG1812G0300003018			log2fc=1.66;P=2.67e-04
74	MYB	MYB32	TuG1812G0400001173			log2fc=2.18;P=4.76e-04
75	MYB	MYB33	TuG1812G0500003456			log2fc=3.17;P=5.83e-08
76	MYB	MYB34	TuG1812G0600002647			log2fc=2.06;P=1.06e-03	log2fc=2.45;P=1.64e-02		log2fc=2.95;P=6.21e-04		log2fc=2.30;P=2.60e-02
77	MYB	MYB36	TuG1812G0700002922			log2fc=1.72;P=3.57e-09
78	MYB	MYB6	TuG1812G0400003487			log2fc=2.82;P=4.52e-13
79	NAC	NAC1	TuG1812G0200003518			log2fc=3.48;P=3.79e-04			log2fc=6.05;P=2.04e-03		log2fc=6.26;P=1.33e-03
80	NAC	NAC10	TuG1812G0200001037	TraesCS2A02G102000|TraesCS2B02G119100|TraesCS2D02G101400	doi: 10.1186/s12870-015-0644-9		log2fc=4.08;P=1.32e-03	log2fc=3.82;P=3.00e-03	log2fc=6.27;P=7.78e-11	log2fc=3.49;P=1.85e-02	log2fc=6.59;P=3.60e-06
81	NAC	NAC11	TuG1812G0300004400	AT1G01720|LOC_Os01g66120	doi: 10.1104/pp.15.00567 | doi:10.1111/j.1365-313X.2007.03168.x		log2fc=2.10;P=3.49e-10		log2fc=2.63;P=3.27e-25		log2fc=2.37;P=1.57e-25
82	NAC	NAC12	TuG1812G0400000994				log2fc=2.39;P=1.47e-22		log2fc=1.79;P=2.60e-14		log2fc=2.31;P=4.64e-31
83	NAC	NAC13	TuG1812G0100003043	AT1G01720|LOC_Os01g66120	doi: 10.1104/pp.15.00567 | doi:10.1111/j.1365-313X.2007.03168.x		log2fc=3.77;P=6.53e-18		log2fc=5.07;P=2.72e-44		log2fc=5.05;P=6.80e-47
84	NAC	NAC14	TuG1812G0200001023	AT5G39610	doi: 10.1111/j.1365-313X.2010.04151.x
	NAC	NAC15	TuG1812G0200001028	AT3G04060|AT5G18270	doi: 10.1016/j.heliyon.2019.e02614	log2fc=-1.64;P=1.07e-13	log2fc=4.89;P=2.65e-45		log2fc=3.35;P=3.27e-21		log2fc=3.95;P=6.66e-47
85	NAC	NAC17	TuG1812G0200003699	AT5G39610	doi: 10.1111/j.1365-313X.2010.04151.x	log2fc=2.86;P=4.07e-10			log2fc=1.73;P=1.38e-02
86	NAC	NAC18	TuG1812G0300001950		doi: 10.1111/j.1365-313X.2008.03493.x		log2fc=2.68;P=1.36e-22
87	NAC	NAC2	TuG1812G0200004319			log2fc=2.97;P=2.17e-06			log2fc=5.61;P=9.08e-06
88	NAC	NAC22	TuG1812G0400001794	AT3G04060|AT5G18270	doi: 10.1016/j.heliyon.2019.e02614
89	NAC	NAC23	TuG1812G0500001778	TraesCS5A02G143200|TraesCS5B02G142100|TraesCS5D02G148800	doi: 10.1093/mp/ssr013	log2fc=1.56;P=3.56e-06	log2fc=3.76;P=9.38e-03		log2fc=6.94;P=8.09e-14		log2fc=6.02;P=1.15e-09
90	NAC	NAC24	TuG1812G0700003239	AT3G49530	doi: 10.4161/psb.11083
91	NAC	NAC26	TuG1812S0002358900	AT3G10500	doi: 10.1111/j.1365-313X.2012.04932.x
92	NAC	NAC27	TuG1812G0200004370			log2fc=7.21;P=1.28e-04
93	NAC	NAC29	TuG1812G0700003569			log2fc=3.03;P=4.18e-07
94	NAC	NAC4	TuG1812G0100003063	AT3G10500	doi: 10.1111/j.1365-313X.2012.04932.x
95	NAC	NAC8	TuG1812G0200002144	LOC_Os07g37920	doi: 10.1104/pp.110.154773	log2fc=1.42;P=1.60e-02	log2fc=3.63;P=4.79e-10
96	NAC	NAC9	TuG1812G0300003762				log2fc=2.28;P=5.16e-08			log2fc=1.21;P=2.89e-02
97	NF-YC	NF-YC-1	TuG1812G0500002936			log2fc=1.15;P=7.23e-03
98	SBP	SBP3	TuG1812G0500003204			log2fc=2.11;P=5.31e-03	log2fc=2.30;P=4.15e-02
99	Trihelix	Trihelix1	TuG1812G0200004404			log2fc=1.31;P=2.19e-06	log2fc=4.13;P=1.59e-35		log2fc=2.74;P=8.77e-14		log2fc=3.83;P=6.24e-35
100	WRKY	WRKY10	TuG1812G0500002577	AT4G31800	doi: 10.1093/jxb/ers293	log2fc=1.16;P=4.30e-02					log2fc=2.83;P=4.30e-04
101	WRKY	WRKY11	TuG1812G0500002578	AT4G31800	doi: 10.1093/jxb/ers293	log2fc=1.76;P=6.72e-09
102	WRKY	WRKY12	TuG1812G0500002949	AT4G26440|AT5G56270|TraesCS5A02G258100|TraesCS5B02G257300|TraesCS5D02G266300	doi:10.1093/jxb/erq204 | doi: 10.1186/s12870-016-0806-4		log2fc=1.10;P=7.01e-04
103	WRKY	WRKY13	TuG1812G0600001555	AT1G80840|AT2G25000	doi: 10.1093/jxb/ers293		log2fc=4.38;P=2.74e-48		log2fc=2.26;P=1.96e-11		log2fc=4.07;P=7.26e-52
104	WRKY	WRKY14	TuG1812G0700002599	AT4G26440|AT5G56270	doi: 10.1093/jxb/erq204
105	WRKY	WRKY15	TuG1812G0700004184	AT1G80840|AT2G25000	doi: 10.1093/jxb/ers293		log2fc=3.14;P=1.48e-05			log2fc=3.82;P=4.42e-05	log2fc=2.27;P=4.52e-03
106	WRKY	WRKY16	TuG1812G0700005478	AT1G80840|AT2G25000	doi: 10.1093/jxb/ers293
107	WRKY	WRKY18	TuG1812S0001864200	AT3G04670	doi: 10.1007/s10059-010-0059-2
108	WRKY	WRKY19	TuG1812S0003428400	AT2G38470|AT5G07100|TraesCS1A02G070400|TraesCS1B02G088900|TraesCS1D02G072900	doi: 10.1007/s11103-008-9408-3 | doi:10.1111/j.1365-3040.2012.02480.x		log2fc=4.82;P=3.39e-16				log2fc=4.64;P=9.80e-16
109	WRKY	WRKY20	TuG1812G0200001916	TraesCS2A02G182700|TraesCS2B02G209200|TraesCS2D02G190500	doi:10.1111/j.1365-3040.2012.02480.x
110	WRKY	WRKY21	TuG1812G0100003384	AT2G38470	doi: 10.1007/s11103-008-9408-3
111	WRKY	WRKY30	TuG1812G0700005479	AT1G80840|AT2G25000	doi: 10.1093/jxb/ers293
112	WRKY	WRKY5	TuG1812G0200005369	LOC_Os05g25770	doi: 10.1007/s11434-009-0710-5
113	WRKY	WRKY8	TuG1812G0400000635	AT3G04670	doi: 10.1007/s10059-010-0059-2
114	ZFHD	ZFHD1	TuG1812G0200003499	LOC_Os04g35500	doi: 10.1093/jxb/ers035
115	ZFHD	ZFHD2	TuG1812G0300002722	AT1G69600	doi: 10.1111/j.1365-313X.2006.02932.x
	AP2/ERF	no DAP-seq data	TuG1812G0100002608	TraesCS1D02G223600	doi:10.1266/ggs.81.77
	AP2/ERF	no DAP-seq data	TuG1812G0100002624	AT2G40220	doi: 10.1007/s11103-011-9733-9
	AP2/ERF	no DAP-seq data	TuG1812G0700002787	AT1G43160|AT5G13330	doi: 10.1007/s11103-010-9711-7
	AP2/ERF	no DAP-seq data	TuG1812G0600001853			log2fc=5.96;P=4.89e-03
	B3	no DAP-seq data	TuG1812G0300004509	AT3G24650	doi: 10.1046/j.1365-313x.2002.01430.x
	bHLH	no DAP-seq data	TuG1812G0300004746	AT3G26744	doi: 10.1101/gad.1077503
	bHLH	no DAP-seq data	TuG1812G0200003220			log2fc=2.69;P=9.44e-05
	bHLH	no DAP-seq data	TuG1812G0400003325			log2fc=6.12;P=2.28e-03
	bHLH	no DAP-seq data	TuG1812G0700001544			log2fc=2.89;P=6.92e-03
	bHLH	no DAP-seq data	TuG1812G0700005791			log2fc=4.18;P=7.81e-14			log2fc=1.36;P=2.73e-02		log2fc=3.40;P=3.25e-16
	bHLH	no DAP-seq data	TuG1812S0000138000			log2fc=7.46;P=1.46e-05
	bZIP	no DAP-seq data	TuG1812G0100002991	AT2G40950	10.1111/j.1365-313X.2007.03195.x
	bZIP	no DAP-seq data	TuG1812G0100003152	LOC_Os01g64730	doi: 10.1007/s11103-009-9592-9
	bZIP	no DAP-seq data	TuG1812G0300004096	AT2G36270	doi: 10.1007/s11103-011-9733-9
	bZIP	no DAP-seq data	TuG1812S0002870200	AT2G36270	doi: 10.1007/s11103-011-9733-9
	bZIP	no DAP-seq data	TuG1812U0000126800	AT2G36270	doi: 10.1007/s11103-011-9733-9
	C2H2	no DAP-seq data	TuG1812G0400000767	AT3G19580|LOC_Os12g39400	doi: 10.1016/s0378-1119(00)00133-5 | doi:10.1016/j.febslet.2008.02.052		log2fc=5.20;P=4.33e-03		log2fc=6.54;P=2.04e-05		log2fc=6.59;P=2.21e-05
	C2H2	no DAP-seq data	TuG1812G0500004252	AT3G19580|LOC_Os12g39400	doi: 10.1016/s0378-1119(00)00133-5 | doi:10.1016/j.febslet.2008.02.052
	C2H2	no DAP-seq data	TuG1812U0000183900	AT3G19580|LOC_Os12g39400	doi: 10.1016/s0378-1119(00)00133-5 | doi:10.1016/j.febslet.2008.02.052
	C2H2	no DAP-seq data	TuG1812G0300002417			log2fc=5.47;P=1.04e-04
	C2H2	no DAP-seq data	TuG1812G0400002712			log2fc=5.17;P=3.82e-03
	C2H2	no DAP-seq data	TuG1812G0500005456			log2fc=6.01;P=3.70e-03
	C3H	no DAP-seq data	TuG1812G0300002754			log2fc=2.77;P=1.61e-05
	GARP-G2	no DAP-seq data	TuG1812G0700005104	TraesCS7B02G372100	doi: 10.1093/jxb/err264
	HB-HD-ZIP	no DAP-seq data	TuG1812G0400003257			log2fc=4.20;P=7.41e-05
	HB-HD-ZIP	no DAP-seq data	TuG1812G0700000951			log2fc=1.35;P=1.45e-03	log2fc=2.24;P=6.02e-12
	HSF	no DAP-seq data	TuG1812G0300004390	AT5G03720	doi: 10.1111/j.1365-313X.2007.03334.x
	HSF	no DAP-seq data	TuG1812G0500004606	AT5G03720	doi: 10.1111/j.1365-313X.2007.03334.x
	HSF	no DAP-seq data	TuG1812S0001096800	AT5G03720	doi: 10.1111/j.1365-313X.2007.03334.x
	LOB	no DAP-seq data	TuG1812G0300001019			log2fc=6.27;P=2.95e-16
	MYB	no DAP-seq data	TuG1812G0100000935	TraesCS1A02G076200	doi: 10.1111/j.1469-8137.2012.04353.x
	MYB	no DAP-seq data	TuG1812G0100003106	TraesCS1A02G268800	doi: 10.1093/pcp/pcu109						log2fc=2.80;P=1.36e-06
	MYB	no DAP-seq data	TuG1812G0100003254	LOC_Os01g62410	doi: 10.1104/pp.106.094532
	MYB	no DAP-seq data	TuG1812G0100004060	TraesCS1A02G365900|TraesCS1A02G366100	doi: 10.1007/s10142-011-0218-3				log2fc=2.19;P=6.79e-03		log2fc=3.07;P=1.61e-05
	MYB	no DAP-seq data	TuG1812G0100004062	TraesCS1A02G365900|TraesCS1A02G366100	doi: 10.1007/s10142-011-0218-3						log2fc=1.32;P=3.69e-02
	MYB	no DAP-seq data	TuG1812G0200001669	TraesCS2A02G158900	doi: 10.1093/jxb/ers237
	MYB	no DAP-seq data	TuG1812G0200001670	TraesCS2A02G158900	doi: 10.1093/jxb/ers237
	MYB	no DAP-seq data	TuG1812G0200002270	TraesCS2A02G206400	doi: 10.1093/jxb/erw298
	MYB	no DAP-seq data	TuG1812G0400000938	TraesCS4A02G211100	doi: 10.1093/jxb/err264
	MYB	no DAP-seq data	TuG1812G0500002616	TraesCS5A02G227400	doi: 10.3389/fpls.2018.01426		log2fc=1.30;P=4.90e-03		log2fc=1.87;P=1.84e-06		log2fc=1.51;P=2.71e-04
	MYB	no DAP-seq data	TuG1812G0600002607	TraesCS6A02G224000|TraesCS6A02G224100|TraesCS6A02G224200	doi: 10.1007/s11033-012-1550-y
	MYB	no DAP-seq data	TuG1812G0700002187	TraesCS7A02G205100	doi: 10.3389/fpls.2017.01374		log2fc=2.48;P=1.00e-02		log2fc=3.72;P=6.18e-07	log2fc=2.91;P=1.18e-02
	MYB	no DAP-seq data	TuG1812G0400002167	LOC_Os03g20090	doi: 10.1093/jxb/err431		log2fc=1.23;P=1.37e-01				log2fc=3.66;P=1.91e-15
	MYB	no DAP-seq data	TuG1812S0000044200	TraesCS3A02G535100	doi:10.1016/j.gene.2012.05.033				log2fc=2.83;P=2.93e-22		log2fc=1.11;P=8.47e-04
	MYB	no DAP-seq data	TuG1812S0000177000	AT5G67300	doi: 10.1104/pp.107.110981
	MYB	no DAP-seq data	TuG1812S0002691700	TraesCS7A02G179900	doi: 10.1007/s10265-016-0857-5
	MYB	no DAP-seq data	TuG1812G0100003254	LOC_Os01g62410	doi: 10.1104/pp.106.094532
	MYB	no DAP-seq data	TuG1812G0300005516	TraesCS3A02G056000|TraesCS3D02G056100	doi: 10.1093/jxb/err264
	MYB	no DAP-seq data	TuG1812G0200001655			log2fc=1.59;P=3.53e-06
	MYB	no DAP-seq data	TuG1812G0200004202			log2fc=5.85;P=6.87e-03
	MYB	no DAP-seq data	TuG1812G0500000970			log2fc=1.17;P=6.82e-04	log2fc=1.44;P=7.13e-04				log2fc=1.20;P=3.04e-03
	MYB	no DAP-seq data	TuG1812G0600002972			log2fc=2.67;P=3.25e-05
	MYB	no DAP-seq data	TuG1812G0300002635			log2fc=1.33;P=1.26e-08
	NAC	no DAP-seq data	TuG1812G0200001035	TraesCS2A02G102000	doi: 10.1186/s12870-015-0644-9
	NAC	no DAP-seq data	TuG1812G0200001036	TraesCS2A02G102000	doi: 10.1186/s12870-015-0644-9			log2fc=3.90;P=2.90e-03	log2fc=6.10;P=5.70e-18		log2fc=4.99;P=2.96e-10
	NAC	no DAP-seq data	TuG1812G0500001779	LOC_Os11g03370	doi: 10.1016/j.bbrc.2008.12.163						log2fc=2.40;P=1.02e-04
	NAC	no DAP-seq data	TuG1812G0600001109	LOC_Os07g37920	doi: 10.1104/pp.110.154773
	NAC	no DAP-seq data	TuG1812G0600002668			log2fc=5.76;P=5.05e-03					log2fc=7.62;P=4.70e-06
	TCP	no DAP-seq data	TuG1812G0300001622			log2fc=2.17;P=4.85e-03
	TCP	no DAP-seq data	TuG1812G0400000967			log2fc=6.44;P=7.30e-04
	TRAF	no DAP-seq data	TuG1812G0100002899	AT5G19330	doi: 10.1105/tpc.105.035659
	Trihelix	no DAP-seq data	TuG1812G0100002104			log2fc=1.04;P=1.39e-04
	Trihelix	no DAP-seq data	TuG1812G0300001315			log2fc=7.58;P=6.73e-06
	Trihelix	no DAP-seq data	TuG1812G0600002690			log2fc=3.65;P=6.33e-03			log2fc=5.82;P=3.77e-03		log2fc=5.23;P=2.47e-02
	WRKY	no DAP-seq data	TuG1812G0200003004	AT1G69310	doi: 10.1093/mp/sss080
	WRKY	no DAP-seq data	TuG1812G0300002541	LOC_Os01g43650	doi: 10.1186/s12284-018-0199-0
	WRKY	no DAP-seq data	TuG1812G0500000726	AT3G04670	doi: 10.1007/s10059-010-0059-2
	WRKY	no DAP-seq data	TuG1812G0700003710	LOC_Os05g25770	doi: 10.1007/s11434-009-0710-5
