# Supplementary material for: Evolutionary rewiring of the wheat transcriptional regulatory network by lineage-specific transposable elements
Source: HighWire-hosted journal article supplement (doi:10.1101/gr.275658.121), 2021-09-09
Supplement: Supplemental_Table_S2.xlsx [file Supplemental_Table_S2.xlsx]

## Sheet: Sheet1
Supplemental Table S2. Quality control steps of DAP-seq datasets. TFs with peak number greater than 300 were marked with 'pass' in column B. TFs with a percentage of peaks overlapping with regulated regions greater than 20% were marked with 'pass' in column C. Regulated regions are defined as having at least one of the following properties: (1) proximal to a gene (within 10 kb from the nearest ge…
TF	peaks number	epigenetic activity	canonical motif	quality
AP2-DREB-1	pass	pass	pass	high confidence
AP2-DREB-18	pass	pass	pass	high confidence
AP2-DREB-19	pass	pass	pass	high confidence
AP2-DREB-21	pass	pass	pass	high confidence
AP2-DREB-7	pass	pass	pass	high confidence
AP2-DREB-8	pass	pass	pass	high confidence
AP2-DREB-9	pass	pass	pass	high confidence
AP2-ERF-13	pass	pass	pass	high confidence
AP2-ERF-23	pass	pass	pass	high confidence
AP2-RAV-26	pass	pass	pass	high confidence
bHLH10	pass	pass	pass	high confidence
bHLH11	pass	pass	pass	high confidence
bZIP10	pass	pass	pass	high confidence
bZIP17	pass	pass	pass	high confidence
bZIP2	pass	pass	pass	high confidence
bZIP20	pass	pass	pass	high confidence
bZIP7	pass	pass	pass	high confidence
HB-HD-ZIP-2	pass	pass	pass	high confidence
HB-HD-ZIP-6	pass	pass	pass	high confidence
MYB11	pass	pass	pass	high confidence
MYB13	pass	pass	pass	high confidence
MYB17	pass	pass	pass	high confidence
MYB26	pass	pass	pass	high confidence
MYB27	pass	pass	pass	high confidence
MYB31	pass	pass	pass	high confidence
NAC14	pass	pass	pass	high confidence
NAC17	pass	pass	pass	high confidence
NAC2	pass	pass	pass	high confidence
NAC29	pass	pass	pass	high confidence
Trihelix1	pass	pass	pass	high confidence
WRKY10	pass	pass	pass	high confidence
WRKY11	pass	pass	pass	high confidence
WRKY12	pass	pass	pass	high confidence
WRKY13	pass	pass	pass	high confidence
WRKY15	pass	pass	pass	high confidence
WRKY16	pass	pass	pass	high confidence
WRKY18	pass	pass	pass	high confidence
WRKY19	pass	pass	pass	high confidence
WRKY20	pass	pass	pass	high confidence
WRKY21	pass	pass	pass	high confidence
WRKY30	pass	pass	pass	high confidence
WRKY5	pass	pass	pass	high confidence
WRKY8	pass	pass	pass	high confidence
ZFHD1	pass	pass	pass	high confidence
ZFHD2	pass	pass	pass	high confidence
GARP5	pass	non-pass	pass	median confidence
HSF1	pass	non-pass	pass	median confidence
MYB19	pass	non-pass	pass	median confidence
NAC18	pass	non-pass	pass	median confidence
NAC26	pass	non-pass	pass	median confidence
NAC4	pass	non-pass	pass	median confidence
NAC15	pass	non-pass	pass	median confidence
C2H2-4	pass	pass	non-pass	median confidence
bHLH5	pass	pass	non-pass	low confidence
MYB12	pass	pass	non-pass	low confidence
MYB23	pass	pass	non-pass	low confidence
NAC10	pass	pass	non-pass	low confidence
NAC12	pass	pass	non-pass	low confidence
NAC13	pass	pass	non-pass	low confidence
NAC23	pass	pass	non-pass	low confidence
NAC9	pass	pass	non-pass	low confidence
MYB14	pass	non-pass	non-pass	low confidence
NAC1	pass	non-pass	non-pass	low confidence
bZIP4	non-pass	pass	pass	low confidence
bZIP8	non-pass	pass	pass	low confidence
MYB2	non-pass	pass	pass	low confidence
WRKY14	non-pass	pass	pass	low confidence
MYB20	non-pass	pass	non-pass	low confidence
MYB21	non-pass	pass	non-pass	low confidence
AP2-XXX-14	non-pass	pass	non-pass	low confidence
AP2-XXX-15	non-pass	pass	non-pass	low confidence
B3-10	non-pass	pass	non-pass	low confidence
bHLH12	non-pass	pass	non-pass	low confidence
bHLH13	non-pass	pass	non-pass	low confidence
bHLH14	non-pass	pass	non-pass	low confidence
bHLH16	non-pass	pass	non-pass	low confidence
bHLH2	non-pass	pass	non-pass	low confidence
bHLH7	non-pass	pass	non-pass	low confidence
bZIP1	non-pass	pass	non-pass	low confidence
bZIP11	non-pass	pass	non-pass	low confidence
bZIP3	non-pass	pass	non-pass	low confidence
bZIP5	non-pass	pass	non-pass	low confidence
C2C2-1	non-pass	pass	non-pass	low confidence
C2C2-2	non-pass	pass	non-pass	low confidence
C2C2-3	non-pass	pass	non-pass	low confidence
C2C2-4	non-pass	pass	non-pass	low confidence
C2C2-5	non-pass	pass	non-pass	low confidence
C3H-1	non-pass	pass	non-pass	low confidence
C3H-2	non-pass	pass	non-pass	low confidence
C3H-5	non-pass	pass	non-pass	low confidence
GARP2	non-pass	pass	non-pass	low confidence
GARP6	non-pass	pass	non-pass	low confidence
GARP-G2-1	non-pass	pass	non-pass	low confidence
GRAS2	non-pass	pass	non-pass	low confidence
HB-HD-ZIP-3	non-pass	pass	non-pass	low confidence
LOB2	non-pass	pass	non-pass	low confidence
LOB3	non-pass	pass	non-pass	low confidence
LOB5	non-pass	pass	non-pass	low confidence
MYB15	non-pass	pass	non-pass	low confidence
MYB16	non-pass	pass	non-pass	low confidence
MYB18	non-pass	pass	non-pass	low confidence
MYB22	non-pass	pass	non-pass	low confidence
MYB24	non-pass	pass	non-pass	low confidence
MYB30	non-pass	pass	non-pass	low confidence
MYB32	non-pass	pass	non-pass	low confidence
MYB33	non-pass	pass	non-pass	low confidence
MYB34	non-pass	pass	non-pass	low confidence
MYB36	non-pass	pass	non-pass	low confidence
MYB6	non-pass	pass	non-pass	low confidence
NAC11	non-pass	pass	non-pass	low confidence
NAC22	non-pass	pass	non-pass	low confidence
NAC24	non-pass	pass	non-pass	low confidence
NAC27	non-pass	pass	non-pass	low confidence
NAC8	non-pass	pass	non-pass	low confidence
NF-YC-1	non-pass	pass	non-pass	low confidence
SBP3	non-pass	pass	non-pass	low confidence
