# Supplementary material for: Evolutionary rewiring of the wheat transcriptional regulatory network by lineage-specific transposable elements
Source: HighWire-hosted journal article supplement (doi:10.1101/gr.275658.121), 2021-09-09
Supplement: Supplemental_Table_S3.xlsx [file Supplemental_Table_S3.xlsx]

## Sheet:  T. urartu-common
Supplemental Table S3A. List of genes commonly induced in T. urartu.
GeneID
TuG1812G0100000039
TuG1812G0100000048
TuG1812G0100000119
TuG1812G0100000120
TuG1812G0100000224
TuG1812G0100000297
TuG1812G0100000347
TuG1812G0100000361
TuG1812G0100000366
TuG1812G0100000374
TuG1812G0100000392
TuG1812G0100000395
TuG1812G0100000403
TuG1812G0100000408
TuG1812G0100000437
TuG1812G0100000448
TuG1812G0100000459
TuG1812G0100000475
TuG1812G0100000517
TuG1812G0100000551
TuG1812G0100000594
TuG1812G0100000635
TuG1812G0100000673
TuG1812G0100000720
TuG1812G0100000748
TuG1812G0100000772
TuG1812G0100000809
TuG1812G0100000823
TuG1812G0100000840
TuG1812G0100000877
TuG1812G0100000890
TuG1812G0100000903
TuG1812G0100000910
TuG1812G0100000921
TuG1812G0100000948
TuG1812G0100000966
TuG1812G0100000986
TuG1812G0100000994
TuG1812G0100000995
TuG1812G0100001000
TuG1812G0100001018
TuG1812G0100001023
TuG1812G0100001025
TuG1812G0100001026
TuG1812G0100001056
TuG1812G0100001105
TuG1812G0100001160
TuG1812G0100001188
TuG1812G0100001203
TuG1812G0100001230
TuG1812G0100001236
TuG1812G0100001237
TuG1812G0100001248
TuG1812G0100001311
TuG1812G0100001385
TuG1812G0100001389
TuG1812G0100001422
TuG1812G0100001423
TuG1812G0100001428
TuG1812G0100001440
TuG1812G0100001531
TuG1812G0100001587
TuG1812G0100001619
TuG1812G0100001622
TuG1812G0100001624
TuG1812G0100001637
TuG1812G0100001706
TuG1812G0100001719
TuG1812G0100001773
TuG1812G0100001797
TuG1812G0100001818
TuG1812G0100001820
TuG1812G0100001826
TuG1812G0100001827
TuG1812G0100001829
TuG1812G0100001845
TuG1812G0100001935
TuG1812G0100001945
TuG1812G0100001952
TuG1812G0100001970
TuG1812G0100002013
TuG1812G0100002052
TuG1812G0100002063
TuG1812G0100002084
TuG1812G0100002085
TuG1812G0100002087
TuG1812G0100002107
TuG1812G0100002113
TuG1812G0100002116
TuG1812G0100002166
TuG1812G0100002174
TuG1812G0100002176
TuG1812G0100002180
TuG1812G0100002182
TuG1812G0100002185
TuG1812G0100002186
TuG1812G0100002187
TuG1812G0100002190
TuG1812G0100002191
TuG1812G0100002192
TuG1812G0100002197
TuG1812G0100002210
TuG1812G0100002249
TuG1812G0100002253
TuG1812G0100002259
TuG1812G0100002272
TuG1812G0100002276
TuG1812G0100002398
TuG1812G0100002410
TuG1812G0100002416
TuG1812G0100002429
TuG1812G0100002435
TuG1812G0100002446
TuG1812G0100002452
TuG1812G0100002467
TuG1812G0100002468
TuG1812G0100002469
TuG1812G0100002493
TuG1812G0100002495
TuG1812G0100002499
TuG1812G0100002502
TuG1812G0100002557
TuG1812G0100002599
TuG1812G0100002687
TuG1812G0100002690
TuG1812G0100002731
TuG1812G0100002748
TuG1812G0100002774
TuG1812G0100002776
TuG1812G0100002808
TuG1812G0100002809
TuG1812G0100002817
TuG1812G0100002822
TuG1812G0100002826
TuG1812G0100002832
TuG1812G0100002844
TuG1812G0100002886
TuG1812G0100002891
TuG1812G0100002919
TuG1812G0100002929
TuG1812G0100002952
TuG1812G0100002954
TuG1812G0100002975
TuG1812G0100002977
TuG1812G0100002985
TuG1812G0100002990
TuG1812G0100002997
TuG1812G0100003043
TuG1812G0100003057
TuG1812G0100003089
TuG1812G0100003090
TuG1812G0100003106
TuG1812G0100003151
TuG1812G0100003155
TuG1812G0100003160
TuG1812G0100003164
TuG1812G0100003181
TuG1812G0100003205
TuG1812G0100003220
TuG1812G0100003231
TuG1812G0100003246
TuG1812G0100003247
TuG1812G0100003255
TuG1812G0100003277
TuG1812G0100003283
TuG1812G0100003300
TuG1812G0100003356
TuG1812G0100003364
TuG1812G0100003382
TuG1812G0100003395
TuG1812G0100003397
TuG1812G0100003405
TuG1812G0100003416
TuG1812G0100003443
TuG1812G0100003465
TuG1812G0100003466
TuG1812G0100003481
TuG1812G0100003497
TuG1812G0100003519
TuG1812G0100003534
TuG1812G0100003535
TuG1812G0100003538
TuG1812G0100003539
TuG1812G0100003577
TuG1812G0100003583
TuG1812G0100003610
TuG1812G0100003674
TuG1812G0100003675
TuG1812G0100003710
TuG1812G0100003718
TuG1812G0100003762
TuG1812G0100003775
TuG1812G0100003793
TuG1812G0100003795
TuG1812G0100003796
TuG1812G0100003810
TuG1812G0100003828
TuG1812G0100003835
TuG1812G0100003849
TuG1812G0100003866
TuG1812G0100003922
TuG1812G0100003937
TuG1812G0100003945
TuG1812G0100003948
TuG1812G0100003978
TuG1812G0100003986
TuG1812G0100003993
TuG1812G0100004011
TuG1812G0100004020
TuG1812G0100004027
TuG1812G0100004031
TuG1812G0100004039
TuG1812G0100004041
TuG1812G0100004051
TuG1812G0100004052
TuG1812G0100004058
TuG1812G0100004067
TuG1812G0100004072
TuG1812G0100004073
TuG1812G0100004074
TuG1812G0100004075
TuG1812G0100004076
TuG1812G0100004096
TuG1812G0100004100
TuG1812G0100004102
TuG1812G0100004108
TuG1812G0100004134
TuG1812G0100004135
TuG1812G0100004195
TuG1812G0100004214
TuG1812G0100004224
TuG1812G0100004269
TuG1812G0100004298
TuG1812G0100004317
TuG1812G0100004326
TuG1812G0100004334
TuG1812G0100004348
TuG1812G0100004352
TuG1812G0100004369
TuG1812G0100004381
TuG1812G0100004402
TuG1812G0100004443
TuG1812G0100004464
TuG1812G0100004474
TuG1812G0100004495
TuG1812G0100004538
TuG1812G0100004548
TuG1812G0100004551
TuG1812G0100004557
TuG1812G0100004576
TuG1812G0100004577
TuG1812G0100004596
TuG1812G0100004597
TuG1812G0100004616
TuG1812G0100004628
TuG1812G0100004665
TuG1812G0100004679
TuG1812G0100004699
TuG1812G0100004756
TuG1812G0100004838
TuG1812G0200000016
TuG1812G0200000045
TuG1812G0200000100
TuG1812G0200000151
TuG1812G0200000172
TuG1812G0200000240
TuG1812G0200000251
TuG1812G0200000298
TuG1812G0200000315
TuG1812G0200000318
TuG1812G0200000322
TuG1812G0200000328
TuG1812G0200000394
TuG1812G0200000412
TuG1812G0200000622
TuG1812G0200000624
TuG1812G0200000625
TuG1812G0200000629
TuG1812G0200000630
TuG1812G0200000632
TuG1812G0200000633
TuG1812G0200000645
TuG1812G0200000646
TuG1812G0200000653
TuG1812G0200000664
TuG1812G0200000683
TuG1812G0200000829
TuG1812G0200000841
TuG1812G0200000846
TuG1812G0200000879
TuG1812G0200000918
TuG1812G0200000970
TuG1812G0200000972
TuG1812G0200000994
TuG1812G0200001005
TuG1812G0200001028
TuG1812G0200001033
TuG1812G0200001036
TuG1812G0200001037
TuG1812G0200001039
TuG1812G0200001064
TuG1812G0200001076
TuG1812G0200001081
TuG1812G0200001083
TuG1812G0200001085
TuG1812G0200001126
TuG1812G0200001132
TuG1812G0200001159
TuG1812G0200001171
TuG1812G0200001175
TuG1812G0200001190
TuG1812G0200001232
TuG1812G0200001234
TuG1812G0200001252
TuG1812G0200001280
TuG1812G0200001286
TuG1812G0200001317
TuG1812G0200001321
TuG1812G0200001331
TuG1812G0200001355
TuG1812G0200001368
TuG1812G0200001382
TuG1812G0200001384
TuG1812G0200001435
TuG1812G0200001437
TuG1812G0200001440
TuG1812G0200001485
TuG1812G0200001486
TuG1812G0200001491
TuG1812G0200001502
TuG1812G0200001525
TuG1812G0200001527
TuG1812G0200001569
TuG1812G0200001579
TuG1812G0200001581
TuG1812G0200001612
TuG1812G0200001616
TuG1812G0200001623
TuG1812G0200001633
TuG1812G0200001655
TuG1812G0200001656
TuG1812G0200001666
TuG1812G0200001668
TuG1812G0200001677
TuG1812G0200001695
TuG1812G0200001697
TuG1812G0200001717
TuG1812G0200001719
TuG1812G0200001739
TuG1812G0200001746
TuG1812G0200001767
TuG1812G0200001774
TuG1812G0200001796
TuG1812G0200001832
TuG1812G0200001840
TuG1812G0200001878
TuG1812G0200001880
TuG1812G0200001884
TuG1812G0200001896
TuG1812G0200001913
TuG1812G0200001929
TuG1812G0200001948
TuG1812G0200001957
TuG1812G0200001958
TuG1812G0200001969
TuG1812G0200001988
TuG1812G0200001992
TuG1812G0200002036
TuG1812G0200002040
TuG1812G0200002044
TuG1812G0200002076
TuG1812G0200002096
TuG1812G0200002111
TuG1812G0200002116
TuG1812G0200002158
TuG1812G0200002179
TuG1812G0200002185
TuG1812G0200002251
TuG1812G0200002259
TuG1812G0200002280
TuG1812G0200002323
TuG1812G0200002332
TuG1812G0200002410
TuG1812G0200002442
TuG1812G0200002446
TuG1812G0200002476
TuG1812G0200002492
TuG1812G0200002521
TuG1812G0200002583
TuG1812G0200002604
TuG1812G0200002640
TuG1812G0200002646
TuG1812G0200002671
TuG1812G0200002677
TuG1812G0200002714
TuG1812G0200002924
TuG1812G0200002930
TuG1812G0200002952
TuG1812G0200002954
TuG1812G0200002965
TuG1812G0200002999
TuG1812G0200003013
TuG1812G0200003026
TuG1812G0200003034
TuG1812G0200003089
TuG1812G0200003095
TuG1812G0200003108
TuG1812G0200003114
TuG1812G0200003139
TuG1812G0200003187
TuG1812G0200003190
TuG1812G0200003207
TuG1812G0200003244
TuG1812G0200003266
TuG1812G0200003276
TuG1812G0200003279
TuG1812G0200003280
TuG1812G0200003313
TuG1812G0200003401
TuG1812G0200003469
TuG1812G0200003511
TuG1812G0200003518
TuG1812G0200003575
TuG1812G0200003581
TuG1812G0200003582
TuG1812G0200003696
TuG1812G0200003699
TuG1812G0200003717
TuG1812G0200003746
TuG1812G0200003754
TuG1812G0200003786
TuG1812G0200003788
TuG1812G0200003796
TuG1812G0200003823
TuG1812G0200003835
TuG1812G0200003845
TuG1812G0200003852
TuG1812G0200003876
TuG1812G0200003899
TuG1812G0200003931
TuG1812G0200003932
TuG1812G0200003967
TuG1812G0200003969
TuG1812G0200003988
TuG1812G0200004016
TuG1812G0200004032
TuG1812G0200004054
TuG1812G0200004076
TuG1812G0200004088
TuG1812G0200004116
TuG1812G0200004118
TuG1812G0200004125
TuG1812G0200004178
TuG1812G0200004209
TuG1812G0200004247
TuG1812G0200004249
TuG1812G0200004266
TuG1812G0200004267
TuG1812G0200004288
TuG1812G0200004292
TuG1812G0200004293
TuG1812G0200004298
TuG1812G0200004304
TuG1812G0200004305
TuG1812G0200004315
TuG1812G0200004319
TuG1812G0200004331
TuG1812G0200004345
TuG1812G0200004352
TuG1812G0200004358
TuG1812G0200004376
TuG1812G0200004404
TuG1812G0200004406
TuG1812G0200004461
TuG1812G0200004468
TuG1812G0200004479
TuG1812G0200004482
TuG1812G0200004492
TuG1812G0200004498
TuG1812G0200004499
TuG1812G0200004507
TuG1812G0200004551
TuG1812G0200004554
TuG1812G0200004595
TuG1812G0200004599
TuG1812G0200004603
TuG1812G0200004612
TuG1812G0200004629
TuG1812G0200004651
TuG1812G0200004657
TuG1812G0200004715
TuG1812G0200004722
TuG1812G0200004736
TuG1812G0200004759
TuG1812G0200004760
TuG1812G0200004768
TuG1812G0200004868
TuG1812G0200004877
TuG1812G0200004886
TuG1812G0200004897
TuG1812G0200004902
TuG1812G0200004918
TuG1812G0200004976
TuG1812G0200005002
TuG1812G0200005012
TuG1812G0200005023
TuG1812G0200005026
TuG1812G0200005030
TuG1812G0200005033
TuG1812G0200005061
TuG1812G0200005073
TuG1812G0200005092
TuG1812G0200005100
TuG1812G0200005116
TuG1812G0200005160
TuG1812G0200005216
TuG1812G0200005234
TuG1812G0200005235
TuG1812G0200005323
TuG1812G0200005385
TuG1812G0200005559
TuG1812G0200005661
TuG1812G0200005662
TuG1812G0200005666
TuG1812G0200005690
TuG1812G0200005692
TuG1812G0200005759
TuG1812G0200005761
TuG1812G0200005763
TuG1812G0200005765
TuG1812G0200005775
TuG1812G0200005816
TuG1812G0200005817
TuG1812G0200005825
TuG1812G0200005861
TuG1812G0200005864
TuG1812G0200005866
TuG1812G0200005896
TuG1812G0200005948
TuG1812G0200005984
TuG1812G0200005985
TuG1812G0200005988
TuG1812G0200006065
TuG1812G0200006164
TuG1812G0200006165
TuG1812G0200006278
TuG1812G0200006288
TuG1812G0200006311
TuG1812G0200006349
TuG1812G0200006359
TuG1812G0200006391
TuG1812G0300000005
TuG1812G0300000006
TuG1812G0300000012
TuG1812G0300000048
TuG1812G0300000124
TuG1812G0300000175
TuG1812G0300000178
TuG1812G0300000184
TuG1812G0300000198
TuG1812G0300000199
TuG1812G0300000200
TuG1812G0300000215
TuG1812G0300000272
TuG1812G0300000275
TuG1812G0300000276
TuG1812G0300000370
TuG1812G0300000375
TuG1812G0300000397
TuG1812G0300000404
TuG1812G0300000440
TuG1812G0300000450
TuG1812G0300000518
TuG1812G0300000534
TuG1812G0300000549
TuG1812G0300000550
TuG1812G0300000551
TuG1812G0300000552
TuG1812G0300000554
TuG1812G0300000589
TuG1812G0300000658
TuG1812G0300000700
TuG1812G0300000800
TuG1812G0300000863
TuG1812G0300000866
TuG1812G0300000868
TuG1812G0300000871
TuG1812G0300000881
TuG1812G0300000912
TuG1812G0300000923
TuG1812G0300000961
TuG1812G0300001005
TuG1812G0300001012
TuG1812G0300001022
TuG1812G0300001066
TuG1812G0300001068
TuG1812G0300001069
TuG1812G0300001090
TuG1812G0300001106
TuG1812G0300001123
TuG1812G0300001138
TuG1812G0300001145
TuG1812G0300001155
TuG1812G0300001170
TuG1812G0300001199
TuG1812G0300001210
TuG1812G0300001214
TuG1812G0300001220
TuG1812G0300001223
TuG1812G0300001270
TuG1812G0300001272
TuG1812G0300001307
TuG1812G0300001318
TuG1812G0300001336
TuG1812G0300001337
TuG1812G0300001355
TuG1812G0300001379
TuG1812G0300001391
TuG1812G0300001413
TuG1812G0300001416
TuG1812G0300001418
TuG1812G0300001424
TuG1812G0300001454
TuG1812G0300001467
TuG1812G0300001483
TuG1812G0300001484
TuG1812G0300001485
TuG1812G0300001512
TuG1812G0300001514
TuG1812G0300001516
TuG1812G0300001519
TuG1812G0300001579
TuG1812G0300001588
TuG1812G0300001597
TuG1812G0300001628
TuG1812G0300001684
TuG1812G0300001731
TuG1812G0300001870
TuG1812G0300001924
TuG1812G0300001931
TuG1812G0300001933
TuG1812G0300001945
TuG1812G0300001950
TuG1812G0300001960
TuG1812G0300002024
TuG1812G0300002056
TuG1812G0300002067
TuG1812G0300002073
TuG1812G0300002090
TuG1812G0300002094
TuG1812G0300002119
TuG1812G0300002133
TuG1812G0300002229
TuG1812G0300002249
TuG1812G0300002264
TuG1812G0300002333
TuG1812G0300002340
TuG1812G0300002342
TuG1812G0300002350
TuG1812G0300002358
TuG1812G0300002410
TuG1812G0300002443
TuG1812G0300002451
TuG1812G0300002453
TuG1812G0300002546
TuG1812G0300002584
TuG1812G0300002598
TuG1812G0300002601
TuG1812G0300002606
TuG1812G0300002615
TuG1812G0300002631
TuG1812G0300002632
TuG1812G0300002635
TuG1812G0300002650
TuG1812G0300002656
TuG1812G0300002737
TuG1812G0300002740
TuG1812G0300002748
TuG1812G0300002754
TuG1812G0300002757
TuG1812G0300002769
TuG1812G0300002773
TuG1812G0300002778
TuG1812G0300002796
TuG1812G0300002825
TuG1812G0300002865
TuG1812G0300002881
TuG1812G0300002883
TuG1812G0300002884
TuG1812G0300002887
TuG1812G0300002895
TuG1812G0300002897
TuG1812G0300002913
TuG1812G0300002915
TuG1812G0300002925
TuG1812G0300002929
TuG1812G0300002940
TuG1812G0300002947
TuG1812G0300002960
TuG1812G0300002976
TuG1812G0300002977
TuG1812G0300002986
TuG1812G0300003024
TuG1812G0300003030
TuG1812G0300003053
TuG1812G0300003068
TuG1812G0300003076
TuG1812G0300003086
TuG1812G0300003117
TuG1812G0300003124
TuG1812G0300003132
TuG1812G0300003205
TuG1812G0300003211
TuG1812G0300003213
TuG1812G0300003220
TuG1812G0300003221
TuG1812G0300003231
TuG1812G0300003235
TuG1812G0300003256
TuG1812G0300003263
TuG1812G0300003268
TuG1812G0300003269
TuG1812G0300003270
TuG1812G0300003278
TuG1812G0300003283
TuG1812G0300003295
TuG1812G0300003301
TuG1812G0300003310
TuG1812G0300003313
TuG1812G0300003340
TuG1812G0300003347
TuG1812G0300003348
TuG1812G0300003353
TuG1812G0300003365
TuG1812G0300003369
TuG1812G0300003371
TuG1812G0300003380
TuG1812G0300003387
TuG1812G0300003419
TuG1812G0300003424
TuG1812G0300003431
TuG1812G0300003473
TuG1812G0300003500
TuG1812G0300003530
TuG1812G0300003534
TuG1812G0300003539
TuG1812G0300003544
TuG1812G0300003595
TuG1812G0300003607
TuG1812G0300003654
TuG1812G0300003655
TuG1812G0300003667
TuG1812G0300003672
TuG1812G0300003678
TuG1812G0300003679
TuG1812G0300003681
TuG1812G0300003682
TuG1812G0300003702
TuG1812G0300003706
TuG1812G0300003707
TuG1812G0300003727
TuG1812G0300003752
TuG1812G0300003754
TuG1812G0300003762
TuG1812G0300003769
TuG1812G0300003784
TuG1812G0300003788
TuG1812G0300003811
TuG1812G0300003822
TuG1812G0300003834
TuG1812G0300003838
TuG1812G0300003839
TuG1812G0300003850
TuG1812G0300003853
TuG1812G0300003859
TuG1812G0300003870
TuG1812G0300003871
TuG1812G0300003875
TuG1812G0300003886
TuG1812G0300003907
TuG1812G0300003917
TuG1812G0300003919
TuG1812G0300003925
TuG1812G0300003937
TuG1812G0300003956
TuG1812G0300003958
TuG1812G0300003964
TuG1812G0300003978
TuG1812G0300003982
TuG1812G0300003992
TuG1812G0300003993
TuG1812G0300003995
TuG1812G0300004003
TuG1812G0300004009
TuG1812G0300004012
TuG1812G0300004016
TuG1812G0300004022
TuG1812G0300004023
TuG1812G0300004026
TuG1812G0300004040
TuG1812G0300004045
TuG1812G0300004055
TuG1812G0300004090
TuG1812G0300004117
TuG1812G0300004142
TuG1812G0300004147
TuG1812G0300004150
TuG1812G0300004154
TuG1812G0300004263
TuG1812G0300004270
TuG1812G0300004273
TuG1812G0300004290
TuG1812G0300004298
TuG1812G0300004315
TuG1812G0300004319
TuG1812G0300004320
TuG1812G0300004322
TuG1812G0300004328
TuG1812G0300004400
TuG1812G0300004402
TuG1812G0300004411
TuG1812G0300004415
TuG1812G0300004427
TuG1812G0300004486
TuG1812G0300004495
TuG1812G0300004508
TuG1812G0300004563
TuG1812G0300004564
TuG1812G0300004680
TuG1812G0300004695
TuG1812G0300004704
TuG1812G0300004734
TuG1812G0300004742
TuG1812G0300004757
TuG1812G0300004829
TuG1812G0300004886
TuG1812G0300004892
TuG1812G0300004944
TuG1812G0300005038
TuG1812G0300005094
TuG1812G0300005115
TuG1812G0300005147
TuG1812G0300005271
TuG1812G0300005331
TuG1812G0300005359
TuG1812G0300005360
TuG1812G0300005418
TuG1812G0300005421
TuG1812G0300005463
TuG1812G0300005485
TuG1812G0300005514
TuG1812G0300005578
TuG1812G0300005596
TuG1812G0300005634
TuG1812G0300005640
TuG1812G0300005729
TuG1812G0300005741
TuG1812G0300005808
TuG1812G0300005831
TuG1812G0300005837
TuG1812G0300005921
TuG1812G0400000034
TuG1812G0400000037
TuG1812G0400000038
TuG1812G0400000040
TuG1812G0400000070
TuG1812G0400000095
TuG1812G0400000117
TuG1812G0400000189
TuG1812G0400000199
TuG1812G0400000211
TuG1812G0400000254
TuG1812G0400000292
TuG1812G0400000295
TuG1812G0400000345
TuG1812G0400000354
TuG1812G0400000375
TuG1812G0400000418
TuG1812G0400000419
TuG1812G0400000421
TuG1812G0400000448
TuG1812G0400000473
TuG1812G0400000494
TuG1812G0400000510
TuG1812G0400000516
TuG1812G0400000518
TuG1812G0400000526
TuG1812G0400000533
TuG1812G0400000551
TuG1812G0400000560
TuG1812G0400000561
TuG1812G0400000595
TuG1812G0400000624
TuG1812G0400000652
TuG1812G0400000657
TuG1812G0400000659
TuG1812G0400000687
TuG1812G0400000712
TuG1812G0400000716
TuG1812G0400000761
TuG1812G0400000767
TuG1812G0400000773
TuG1812G0400000803
TuG1812G0400000823
TuG1812G0400000830
TuG1812G0400000832
TuG1812G0400000843
TuG1812G0400000865
TuG1812G0400000868
TuG1812G0400000882
TuG1812G0400000902
TuG1812G0400000916
TuG1812G0400000928
TuG1812G0400000933
TuG1812G0400000994
TuG1812G0400000999
TuG1812G0400001005
TuG1812G0400001050
TuG1812G0400001058
TuG1812G0400001068
TuG1812G0400001098
TuG1812G0400001123
TuG1812G0400001147
TuG1812G0400001164
TuG1812G0400001191
TuG1812G0400001195
TuG1812G0400001205
TuG1812G0400001212
TuG1812G0400001226
TuG1812G0400001228
TuG1812G0400001270
TuG1812G0400001280
TuG1812G0400001296
TuG1812G0400001322
TuG1812G0400001326
TuG1812G0400001327
TuG1812G0400001352
TuG1812G0400001374
TuG1812G0400001386
TuG1812G0400001463
TuG1812G0400001497
TuG1812G0400001499
TuG1812G0400001501
TuG1812G0400001521
TuG1812G0400001531
TuG1812G0400001535
TuG1812G0400001537
TuG1812G0400001624
TuG1812G0400001710
TuG1812G0400001788
TuG1812G0400001793
TuG1812G0400001803
TuG1812G0400001816
TuG1812G0400001849
TuG1812G0400001856
TuG1812G0400001858
TuG1812G0400001874
TuG1812G0400001963
TuG1812G0400001966
TuG1812G0400002049
TuG1812G0400002109
TuG1812G0400002144
TuG1812G0400002166
TuG1812G0400002167
TuG1812G0400002172
TuG1812G0400002217
TuG1812G0400002219
TuG1812G0400002221
TuG1812G0400002224
TuG1812G0400002232
TuG1812G0400002248
TuG1812G0400002257
TuG1812G0400002263
TuG1812G0400002326
TuG1812G0400002351
TuG1812G0400002367
TuG1812G0400002371
TuG1812G0400002376
TuG1812G0400002387
TuG1812G0400002396
TuG1812G0400002401
TuG1812G0400002402
TuG1812G0400002405
TuG1812G0400002406
TuG1812G0400002428
TuG1812G0400002453
TuG1812G0400002454
TuG1812G0400002456
TuG1812G0400002472
TuG1812G0400002474
TuG1812G0400002476
TuG1812G0400002484
TuG1812G0400002485
TuG1812G0400002486
TuG1812G0400002488
TuG1812G0400002490
TuG1812G0400002492
TuG1812G0400002504
TuG1812G0400002505
TuG1812G0400002510
TuG1812G0400002519
TuG1812G0400002522
TuG1812G0400002531
TuG1812G0400002568
TuG1812G0400002569
TuG1812G0400002579
TuG1812G0400002590
TuG1812G0400002592
TuG1812G0400002609
TuG1812G0400002612
TuG1812G0400002613
TuG1812G0400002620
TuG1812G0400002630
TuG1812G0400002644
TuG1812G0400002648
TuG1812G0400002665
TuG1812G0400002666
TuG1812G0400002691
TuG1812G0400002716
TuG1812G0400002719
TuG1812G0400002746
TuG1812G0400002771
TuG1812G0400002777
TuG1812G0400002778
TuG1812G0400002781
TuG1812G0400002785
TuG1812G0400002811
TuG1812G0400002819
TuG1812G0400002833
TuG1812G0400002862
TuG1812G0400002863
TuG1812G0400002872
TuG1812G0400002903
TuG1812G0400002924
TuG1812G0400002929
TuG1812G0400002932
TuG1812G0400002944
TuG1812G0400002953
TuG1812G0400002982
TuG1812G0400003024
TuG1812G0400003026
TuG1812G0400003035
TuG1812G0400003036
TuG1812G0400003037
TuG1812G0400003043
TuG1812G0400003065
TuG1812G0400003090
TuG1812G0400003092
TuG1812G0400003138
TuG1812G0400003153
TuG1812G0400003168
TuG1812G0400003180
TuG1812G0400003184
TuG1812G0400003191
TuG1812G0400003245
TuG1812G0400003251
TuG1812G0400003264
TuG1812G0400003304
TuG1812G0400003306
TuG1812G0400003341
TuG1812G0400003365
TuG1812G0400003445
TuG1812G0400003482
TuG1812G0400003485
TuG1812G0400003508
TuG1812G0400003510
TuG1812G0400003526
TuG1812G0400003528
TuG1812G0400003529
TuG1812G0400003546
TuG1812G0400003566
TuG1812G0400003620
TuG1812G0400003625
TuG1812G0400003647
TuG1812G0400003688
TuG1812G0400003772
TuG1812G0400003791
TuG1812G0400003794
TuG1812G0400003795
TuG1812G0400003808
TuG1812G0400003809
TuG1812G0400003810
TuG1812G0400003876
TuG1812G0400003921
TuG1812G0400003933
TuG1812G0400004018
TuG1812G0500000009
TuG1812G0500000013
TuG1812G0500000059
TuG1812G0500000063
TuG1812G0500000070
TuG1812G0500000110
TuG1812G0500000133
TuG1812G0500000181
TuG1812G0500000182
TuG1812G0500000187
TuG1812G0500000214
TuG1812G0500000228
TuG1812G0500000229
TuG1812G0500000294
TuG1812G0500000319
TuG1812G0500000364
TuG1812G0500000385
TuG1812G0500000482
TuG1812G0500000514
TuG1812G0500000600
TuG1812G0500000603
TuG1812G0500000605
TuG1812G0500000645
TuG1812G0500000647
TuG1812G0500000657
TuG1812G0500000689
TuG1812G0500000695
TuG1812G0500000723
TuG1812G0500000724
TuG1812G0500000744
TuG1812G0500000752
TuG1812G0500000796
TuG1812G0500000816
TuG1812G0500000831
TuG1812G0500000842
TuG1812G0500000880
TuG1812G0500000884
TuG1812G0500000901
TuG1812G0500000947
TuG1812G0500000955
TuG1812G0500000970
TuG1812G0500000974
TuG1812G0500000985
TuG1812G0500001023
TuG1812G0500001054
TuG1812G0500001062
TuG1812G0500001094
TuG1812G0500001116
TuG1812G0500001174
TuG1812G0500001184
TuG1812G0500001190
TuG1812G0500001220
TuG1812G0500001315
TuG1812G0500001353
TuG1812G0500001385
TuG1812G0500001461
TuG1812G0500001489
TuG1812G0500001494
TuG1812G0500001523
TuG1812G0500001608
TuG1812G0500001639
TuG1812G0500001643
TuG1812G0500001648
TuG1812G0500001666
TuG1812G0500001719
TuG1812G0500001722
TuG1812G0500001726
TuG1812G0500001740
TuG1812G0500001741
TuG1812G0500001742
TuG1812G0500001767
TuG1812G0500001774
TuG1812G0500001778
TuG1812G0500001779
TuG1812G0500001785
TuG1812G0500001841
TuG1812G0500001863
TuG1812G0500001921
TuG1812G0500001938
TuG1812G0500001945
TuG1812G0500001972
TuG1812G0500001974
TuG1812G0500002058
TuG1812G0500002062
TuG1812G0500002063
TuG1812G0500002085
TuG1812G0500002101
TuG1812G0500002122
TuG1812G0500002147
TuG1812G0500002156
TuG1812G0500002157
TuG1812G0500002167
TuG1812G0500002173
TuG1812G0500002188
TuG1812G0500002199
TuG1812G0500002246
TuG1812G0500002274
TuG1812G0500002306
TuG1812G0500002307
TuG1812G0500002315
TuG1812G0500002321
TuG1812G0500002353
TuG1812G0500002358
TuG1812G0500002388
TuG1812G0500002395
TuG1812G0500002408
TuG1812G0500002410
TuG1812G0500002420
TuG1812G0500002435
TuG1812G0500002438
TuG1812G0500002442
TuG1812G0500002450
TuG1812G0500002482
TuG1812G0500002484
TuG1812G0500002509
TuG1812G0500002511
TuG1812G0500002512
TuG1812G0500002513
TuG1812G0500002514
TuG1812G0500002515
TuG1812G0500002535
TuG1812G0500002566
TuG1812G0500002574
TuG1812G0500002599
TuG1812G0500002616
TuG1812G0500002633
TuG1812G0500002658
TuG1812G0500002667
TuG1812G0500002672
TuG1812G0500002690
TuG1812G0500002693
TuG1812G0500002736
TuG1812G0500002737
TuG1812G0500002754
TuG1812G0500002757
TuG1812G0500002764
TuG1812G0500002770
TuG1812G0500002791
TuG1812G0500002800
TuG1812G0500002848
TuG1812G0500002872
TuG1812G0500002949
TuG1812G0500002985
TuG1812G0500003022
TuG1812G0500003070
TuG1812G0500003074
TuG1812G0500003075
TuG1812G0500003117
TuG1812G0500003165
TuG1812G0500003173
TuG1812G0500003175
TuG1812G0500003263
TuG1812G0500003287
TuG1812G0500003300
TuG1812G0500003326
TuG1812G0500003336
TuG1812G0500003354
TuG1812G0500003355
TuG1812G0500003357
TuG1812G0500003416
TuG1812G0500003417
TuG1812G0500003423
TuG1812G0500003424
TuG1812G0500003451
TuG1812G0500003454
TuG1812G0500003476
TuG1812G0500003486
TuG1812G0500003512
TuG1812G0500003546
TuG1812G0500003592
TuG1812G0500003599
TuG1812G0500003623
TuG1812G0500003625
TuG1812G0500003656
TuG1812G0500003664
TuG1812G0500003673
TuG1812G0500003677
TuG1812G0500003678
TuG1812G0500003680
TuG1812G0500003697
TuG1812G0500003701
TuG1812G0500003704
TuG1812G0500003715
TuG1812G0500003725
TuG1812G0500003727
TuG1812G0500003773
TuG1812G0500003826
TuG1812G0500003841
TuG1812G0500003848
TuG1812G0500003864
TuG1812G0500003867
TuG1812G0500003877
TuG1812G0500003891
TuG1812G0500003902
TuG1812G0500003971
TuG1812G0500003973
TuG1812G0500003989
TuG1812G0500004010
TuG1812G0500004035
TuG1812G0500004048
TuG1812G0500004057
TuG1812G0500004065
TuG1812G0500004069
TuG1812G0500004072
TuG1812G0500004075
TuG1812G0500004118
TuG1812G0500004126
TuG1812G0500004141
TuG1812G0500004153
TuG1812G0500004168
TuG1812G0500004171
TuG1812G0500004172
TuG1812G0500004173
TuG1812G0500004193
TuG1812G0500004197
TuG1812G0500004199
TuG1812G0500004204
TuG1812G0500004226
TuG1812G0500004228
TuG1812G0500004240
TuG1812G0500004277
TuG1812G0500004283
TuG1812G0500004296
TuG1812G0500004308
TuG1812G0500004313
TuG1812G0500004320
TuG1812G0500004403
TuG1812G0500004474
TuG1812G0500004480
TuG1812G0500004492
TuG1812G0500004527
TuG1812G0500004542
TuG1812G0500004568
TuG1812G0500004679
TuG1812G0500004703
TuG1812G0500004711
TuG1812G0500004713
TuG1812G0500004715
TuG1812G0500004728
TuG1812G0500004729
TuG1812G0500004741
TuG1812G0500004754
TuG1812G0500004762
TuG1812G0500004793
TuG1812G0500004831
TuG1812G0500004846
TuG1812G0500004874
TuG1812G0500004885
TuG1812G0500004889
TuG1812G0500004890
TuG1812G0500004891
TuG1812G0500004901
TuG1812G0500004908
TuG1812G0500004910
TuG1812G0500004912
TuG1812G0500004914
TuG1812G0500004921
TuG1812G0500004931
TuG1812G0500004962
TuG1812G0500004988
TuG1812G0500005000
TuG1812G0500005013
TuG1812G0500005027
TuG1812G0500005104
TuG1812G0500005114
TuG1812G0500005130
TuG1812G0500005150
TuG1812G0500005160
TuG1812G0500005209
TuG1812G0500005226
TuG1812G0500005246
TuG1812G0500005249
TuG1812G0500005250
TuG1812G0500005266
TuG1812G0500005286
TuG1812G0500005287
TuG1812G0500005306
TuG1812G0500005359
TuG1812G0500005406
TuG1812G0500005433
TuG1812G0500005440
TuG1812G0500005443
TuG1812G0500005450
TuG1812G0500005454
TuG1812G0500005479
TuG1812G0500005490
TuG1812G0500005504
TuG1812G0500005505
TuG1812G0500005549
TuG1812G0500005569
TuG1812G0500005582
TuG1812G0500005589
TuG1812G0500005596
TuG1812G0500005599
TuG1812G0500005603
TuG1812G0500005604
TuG1812G0500005657
TuG1812G0500005665
TuG1812G0500005676
TuG1812G0500005708
TuG1812G0600000035
TuG1812G0600000073
TuG1812G0600000079
TuG1812G0600000085
TuG1812G0600000220
TuG1812G0600000227
TuG1812G0600000259
TuG1812G0600000282
TuG1812G0600000314
TuG1812G0600000378
TuG1812G0600000391
TuG1812G0600000441
TuG1812G0600000442
TuG1812G0600000445
TuG1812G0600000449
TuG1812G0600000521
TuG1812G0600000528
TuG1812G0600000565
TuG1812G0600000568
TuG1812G0600000606
TuG1812G0600000655
TuG1812G0600000668
TuG1812G0600000704
TuG1812G0600000716
TuG1812G0600000732
TuG1812G0600000853
TuG1812G0600000913
TuG1812G0600000933
TuG1812G0600000978
TuG1812G0600000987
TuG1812G0600001000
TuG1812G0600001051
TuG1812G0600001112
TuG1812G0600001216
TuG1812G0600001240
TuG1812G0600001283
TuG1812G0600001311
TuG1812G0600001345
TuG1812G0600001386
TuG1812G0600001401
TuG1812G0600001479
TuG1812G0600001510
TuG1812G0600001523
TuG1812G0600001527
TuG1812G0600001531
TuG1812G0600001540
TuG1812G0600001555
TuG1812G0600001562
TuG1812G0600001614
TuG1812G0600001623
TuG1812G0600001649
TuG1812G0600001727
TuG1812G0600001731
TuG1812G0600001738
TuG1812G0600001750
TuG1812G0600001760
TuG1812G0600001765
TuG1812G0600001782
TuG1812G0600001807
TuG1812G0600001815
TuG1812G0600001826
TuG1812G0600001849
TuG1812G0600001856
TuG1812G0600001911
TuG1812G0600001933
TuG1812G0600001940
TuG1812G0600001945
TuG1812G0600002000
TuG1812G0600002096
TuG1812G0600002103
TuG1812G0600002150
TuG1812G0600002157
TuG1812G0600002208
TuG1812G0600002217
TuG1812G0600002220
TuG1812G0600002236
TuG1812G0600002279
TuG1812G0600002334
TuG1812G0600002447
TuG1812G0600002467
TuG1812G0600002471
TuG1812G0600002479
TuG1812G0600002522
TuG1812G0600002539
TuG1812G0600002548
TuG1812G0600002564
TuG1812G0600002572
TuG1812G0600002588
TuG1812G0600002595
TuG1812G0600002606
TuG1812G0600002609
TuG1812G0600002622
TuG1812G0600002627
TuG1812G0600002628
TuG1812G0600002642
TuG1812G0600002650
TuG1812G0600002679
TuG1812G0600002683
TuG1812G0600002697
TuG1812G0600002705
TuG1812G0600002711
TuG1812G0600002738
TuG1812G0600002739
TuG1812G0600002752
TuG1812G0600002767
TuG1812G0600002776
TuG1812G0600002777
TuG1812G0600002788
TuG1812G0600002803
TuG1812G0600002806
TuG1812G0600002817
TuG1812G0600002828
TuG1812G0600002830
TuG1812G0600002849
TuG1812G0600002854
TuG1812G0600002865
TuG1812G0600002870
TuG1812G0600002884
TuG1812G0600002893
TuG1812G0600002897
TuG1812G0600002899
TuG1812G0600002900
TuG1812G0600002931
TuG1812G0600002934
TuG1812G0600002935
TuG1812G0600002942
TuG1812G0600002972
TuG1812G0600002979
TuG1812G0600002981
TuG1812G0600002983
TuG1812G0600002986
TuG1812G0600002989
TuG1812G0600003009
TuG1812G0600003033
TuG1812G0600003041
TuG1812G0600003065
TuG1812G0600003067
TuG1812G0600003069
TuG1812G0600003072
TuG1812G0600003079
TuG1812G0600003097
TuG1812G0600003110
TuG1812G0600003119
TuG1812G0600003130
TuG1812G0600003208
TuG1812G0600003225
TuG1812G0600003227
TuG1812G0600003230
TuG1812G0600003249
TuG1812G0600003251
TuG1812G0600003257
TuG1812G0600003264
TuG1812G0600003271
TuG1812G0600003274
TuG1812G0600003283
TuG1812G0600003311
TuG1812G0600003325
TuG1812G0600003332
TuG1812G0600003341
TuG1812G0600003350
TuG1812G0600003397
TuG1812G0600003399
TuG1812G0600003401
TuG1812G0600003413
TuG1812G0600003427
TuG1812G0600003436
TuG1812G0600003458
TuG1812G0600003462
TuG1812G0600003485
TuG1812G0600003486
TuG1812G0600003528
TuG1812G0600003537
TuG1812G0600003551
TuG1812G0600003557
TuG1812G0600003600
TuG1812G0600003619
TuG1812G0600003620
TuG1812G0600003651
TuG1812G0600003653
TuG1812G0600003673
TuG1812G0600003749
TuG1812G0600003751
TuG1812G0600003754
TuG1812G0600003767
TuG1812G0600003774
TuG1812G0600003779
TuG1812G0600003940
TuG1812G0600003943
TuG1812G0600003969
TuG1812G0600004001
TuG1812G0600004012
TuG1812G0600004039
TuG1812G0600004137
TuG1812G0600004143
TuG1812G0600004145
TuG1812G0600004147
TuG1812G0600004169
TuG1812G0600004223
TuG1812G0600004264
TuG1812G0600004320
TuG1812G0600004321
TuG1812G0600004356
TuG1812G0600004368
TuG1812G0600004385
TuG1812G0600004388
TuG1812G0600004400
TuG1812G0700000032
TuG1812G0700000113
TuG1812G0700000278
TuG1812G0700000279
TuG1812G0700000295
TuG1812G0700000316
TuG1812G0700000402
TuG1812G0700000482
TuG1812G0700000485
TuG1812G0700000486
TuG1812G0700000564
TuG1812G0700000587
TuG1812G0700000606
TuG1812G0700000617
TuG1812G0700000622
TuG1812G0700000663
TuG1812G0700000725
TuG1812G0700000769
TuG1812G0700000792
TuG1812G0700000888
TuG1812G0700000914
TuG1812G0700000929
TuG1812G0700000990
TuG1812G0700001003
TuG1812G0700001006
TuG1812G0700001085
TuG1812G0700001124
TuG1812G0700001149
TuG1812G0700001221
TuG1812G0700001222
TuG1812G0700001223
TuG1812G0700001236
TuG1812G0700001239
TuG1812G0700001299
TuG1812G0700001303
TuG1812G0700001305
TuG1812G0700001315
TuG1812G0700001323
TuG1812G0700001372
TuG1812G0700001387
TuG1812G0700001388
TuG1812G0700001391
TuG1812G0700001459
TuG1812G0700001467
TuG1812G0700001472
TuG1812G0700001512
TuG1812G0700001527
TuG1812G0700001528
TuG1812G0700001533
TuG1812G0700001553
TuG1812G0700001583
TuG1812G0700001612
TuG1812G0700001616
TuG1812G0700001639
TuG1812G0700001654
TuG1812G0700001660
TuG1812G0700001663
TuG1812G0700001671
TuG1812G0700001672
TuG1812G0700001686
TuG1812G0700001703
TuG1812G0700001737
TuG1812G0700001757
TuG1812G0700001760
TuG1812G0700001761
TuG1812G0700001801
TuG1812G0700001827
TuG1812G0700001829
TuG1812G0700001849
TuG1812G0700001870
TuG1812G0700001883
TuG1812G0700001885
TuG1812G0700001897
TuG1812G0700001902
TuG1812G0700001910
TuG1812G0700001940
TuG1812G0700001949
TuG1812G0700002004
TuG1812G0700002011
TuG1812G0700002017
TuG1812G0700002031
TuG1812G0700002107
TuG1812G0700002116
TuG1812G0700002118
TuG1812G0700002134
TuG1812G0700002150
TuG1812G0700002177
TuG1812G0700002187
TuG1812G0700002218
TuG1812G0700002228
TuG1812G0700002230
TuG1812G0700002242
TuG1812G0700002286
TuG1812G0700002291
TuG1812G0700002322
TuG1812G0700002334
TuG1812G0700002381
TuG1812G0700002388
TuG1812G0700002395
TuG1812G0700002422
TuG1812G0700002431
TuG1812G0700002432
TuG1812G0700002458
TuG1812G0700002475
TuG1812G0700002483
TuG1812G0700002497
TuG1812G0700002506
TuG1812G0700002508
TuG1812G0700002527
TuG1812G0700002542
TuG1812G0700002566
TuG1812G0700002575
TuG1812G0700002592
TuG1812G0700002594
TuG1812G0700002595
TuG1812G0700002610
TuG1812G0700002624
TuG1812G0700002651
TuG1812G0700002677
TuG1812G0700002685
TuG1812G0700002689
TuG1812G0700002698
TuG1812G0700002713
TuG1812G0700002733
TuG1812G0700002742
TuG1812G0700002812
TuG1812G0700002832
TuG1812G0700002850
TuG1812G0700002855
TuG1812G0700002868
TuG1812G0700002907
TuG1812G0700002917
TuG1812G0700002922
TuG1812G0700002929
TuG1812G0700002935
TuG1812G0700003089
TuG1812G0700003174
TuG1812G0700003197
TuG1812G0700003234
TuG1812G0700003290
TuG1812G0700003291
TuG1812G0700003340
TuG1812G0700003400
TuG1812G0700003403
TuG1812G0700003411
TuG1812G0700003412
TuG1812G0700003422
TuG1812G0700003442
TuG1812G0700003452
TuG1812G0700003484
TuG1812G0700003499
TuG1812G0700003507
TuG1812G0700003527
TuG1812G0700003532
TuG1812G0700003537
TuG1812G0700003542
TuG1812G0700003543
TuG1812G0700003550
TuG1812G0700003564
TuG1812G0700003565
TuG1812G0700003575
TuG1812G0700003592
TuG1812G0700003604
TuG1812G0700003625
TuG1812G0700003642
TuG1812G0700003648
TuG1812G0700003657
TuG1812G0700003673
TuG1812G0700003681
TuG1812G0700003694
TuG1812G0700003743
TuG1812G0700003771
TuG1812G0700003808
TuG1812G0700003850
TuG1812G0700003860
TuG1812G0700003867
TuG1812G0700003908
TuG1812G0700003944
TuG1812G0700003946
TuG1812G0700003993
TuG1812G0700004031
TuG1812G0700004033
TuG1812G0700004066
TuG1812G0700004100
TuG1812G0700004149
TuG1812G0700004184
TuG1812G0700004194
TuG1812G0700004234
TuG1812G0700004255
TuG1812G0700004258
TuG1812G0700004265
TuG1812G0700004308
TuG1812G0700004357
TuG1812G0700004368
TuG1812G0700004411
TuG1812G0700004462
TuG1812G0700004509
TuG1812G0700004517
TuG1812G0700004548
TuG1812G0700004563
TuG1812G0700004594
TuG1812G0700004634
TuG1812G0700004640
TuG1812G0700004647
TuG1812G0700004650
TuG1812G0700004652
TuG1812G0700004653
TuG1812G0700004655
TuG1812G0700004659
TuG1812G0700004660
TuG1812G0700004661
TuG1812G0700004663
TuG1812G0700004691
TuG1812G0700004763
TuG1812G0700004767
TuG1812G0700004831
TuG1812G0700004833
TuG1812G0700004857
TuG1812G0700004858
TuG1812G0700004922
TuG1812G0700004937
TuG1812G0700004942
TuG1812G0700004969
TuG1812G0700004978
TuG1812G0700004982
TuG1812G0700004988
TuG1812G0700004989
TuG1812G0700004994
TuG1812G0700005065
TuG1812G0700005066
TuG1812G0700005088
TuG1812G0700005089
TuG1812G0700005106
TuG1812G0700005107
TuG1812G0700005112
TuG1812G0700005230
TuG1812G0700005246
TuG1812G0700005271
TuG1812G0700005318
TuG1812G0700005364
TuG1812G0700005375
TuG1812G0700005425
TuG1812G0700005455
TuG1812G0700005470
TuG1812G0700005535
TuG1812G0700005565
TuG1812G0700005581
TuG1812G0700005613
TuG1812G0700005684
TuG1812G0700005730
TuG1812G0700005807
TuG1812G0700005820
TuG1812G0700005868
TuG1812G0700005899
TuG1812G0700005977
TuG1812G0700005984
TuG1812G0700005991
TuG1812S0000026800
TuG1812S0000032300
TuG1812S0000057900
TuG1812S0000093200
TuG1812S0000107500
TuG1812S0000113500
TuG1812S0000121900
TuG1812S0000132300
TuG1812S0000138000
TuG1812S0000151700
TuG1812S0000172100
TuG1812S0000175900
TuG1812S0000214400
TuG1812S0000263400
TuG1812S0000270600
TuG1812S0000291100
TuG1812S0000313700
TuG1812S0000370100
TuG1812S0000376500
TuG1812S0000390800
TuG1812S0000402400
TuG1812S0000408000
TuG1812S0000444800
TuG1812S0000509700
TuG1812S0000538300
TuG1812S0000587000
TuG1812S0000619900
TuG1812S0000632900
TuG1812S0000663700
TuG1812S0000666600
TuG1812S0000711500
TuG1812S0000777100
TuG1812S0000783700
TuG1812S0000785200
TuG1812S0000800700
TuG1812S0000803900
TuG1812S0000804300
TuG1812S0000812000
TuG1812S0000836200
TuG1812S0000851000
TuG1812S0000865000
TuG1812S0000878800
TuG1812S0000882800
TuG1812S0000885200
TuG1812S0000915700
TuG1812S0000973300
TuG1812S0000977600
TuG1812S0001111500
TuG1812S0001154700
TuG1812S0001278800
TuG1812S0001294800
TuG1812S0001346400
TuG1812S0001356800
TuG1812S0001363700
TuG1812S0001427400
TuG1812S0001459900
TuG1812S0001463600
TuG1812S0001470100
TuG1812S0001480500
TuG1812S0001539000
TuG1812S0001548500
TuG1812S0001553900
TuG1812S0001555100
TuG1812S0001566600
TuG1812S0001571700
TuG1812S0001602300
TuG1812S0001610400
TuG1812S0001634800
TuG1812S0001650900
TuG1812S0001652900
TuG1812S0001660600
TuG1812S0001686000
TuG1812S0001694100
TuG1812S0001699900
TuG1812S0001703000
TuG1812S0001707900
TuG1812S0001750800
TuG1812S0001751900
TuG1812S0001778400
TuG1812S0001802100
TuG1812S0001826200
TuG1812S0001863800
TuG1812S0001864900
TuG1812S0001936300
TuG1812S0001942600
TuG1812S0001947500
TuG1812S0001975800
TuG1812S0001976300
TuG1812S0001997000
TuG1812S0002008600
TuG1812S0002012600
TuG1812S0002029900
TuG1812S0002034900
TuG1812S0002047700
TuG1812S0002083700
TuG1812S0002116000
TuG1812S0002136600
TuG1812S0002157800
TuG1812S0002158100
TuG1812S0002224100
TuG1812S0002233900
TuG1812S0002265900
TuG1812S0002283300
TuG1812S0002320400
TuG1812S0002323400
TuG1812S0002323600
TuG1812S0002346100
TuG1812S0002368000
TuG1812S0002425400
TuG1812S0002465500
TuG1812S0002467000
TuG1812S0002485400
TuG1812S0002494300
TuG1812S0002498200
TuG1812S0002509000
TuG1812S0002577700
TuG1812S0002627500
TuG1812S0002628200
TuG1812S0002656500
TuG1812S0002661000
TuG1812S0002675000
TuG1812S0002710000
TuG1812S0002745200
TuG1812S0002753000
TuG1812S0002753400
TuG1812S0002765800
TuG1812S0002785100
TuG1812S0002789300
TuG1812S0002832000
TuG1812S0002844800
TuG1812S0002856400
TuG1812S0002874800
TuG1812S0002908800
TuG1812S0002960300
TuG1812S0002963900
TuG1812S0003028900
TuG1812S0003054000
TuG1812S0003055700
TuG1812S0003060300
TuG1812S0003064100
TuG1812S0003081800
TuG1812S0003084000
TuG1812S0003095000
TuG1812S0003105800
TuG1812S0003125900
TuG1812S0003146900
TuG1812S0003165700
TuG1812S0003182700
TuG1812S0003250500
[truncated: 20 more rows]

## Sheet:  T. urartu-unique
Supplemental Table S3B. List of genes uniquely induced in T. urartu.
GeneID
TuG1812G0100000018
TuG1812G0100000035
TuG1812G0100000038
TuG1812G0100000050
TuG1812G0100000051
TuG1812G0100000058
TuG1812G0100000060
TuG1812G0100000079
TuG1812G0100000133
TuG1812G0100000146
TuG1812G0100000156
TuG1812G0100000211
TuG1812G0100000214
TuG1812G0100000215
TuG1812G0100000223
TuG1812G0100000236
TuG1812G0100000256
TuG1812G0100000293
TuG1812G0100000294
TuG1812G0100000300
TuG1812G0100000355
TuG1812G0100000363
TuG1812G0100000373
TuG1812G0100000376
TuG1812G0100000384
TuG1812G0100000390
TuG1812G0100000391
TuG1812G0100000426
TuG1812G0100000463
TuG1812G0100000464
TuG1812G0100000521
TuG1812G0100000540
TuG1812G0100000546
TuG1812G0100000549
TuG1812G0100000617
TuG1812G0100000620
TuG1812G0100000631
TuG1812G0100000662
TuG1812G0100000814
TuG1812G0100000825
TuG1812G0100000876
TuG1812G0100000879
TuG1812G0100000891
TuG1812G0100000893
TuG1812G0100000908
TuG1812G0100000911
TuG1812G0100000933
TuG1812G0100000947
TuG1812G0100000961
TuG1812G0100000962
TuG1812G0100000996
TuG1812G0100000997
TuG1812G0100000999
TuG1812G0100001004
TuG1812G0100001015
TuG1812G0100001024
TuG1812G0100001066
TuG1812G0100001106
TuG1812G0100001112
TuG1812G0100001124
TuG1812G0100001143
TuG1812G0100001157
TuG1812G0100001158
TuG1812G0100001166
TuG1812G0100001171
TuG1812G0100001185
TuG1812G0100001186
TuG1812G0100001192
TuG1812G0100001208
TuG1812G0100001209
TuG1812G0100001218
TuG1812G0100001227
TuG1812G0100001231
TuG1812G0100001250
TuG1812G0100001265
TuG1812G0100001278
TuG1812G0100001281
TuG1812G0100001286
TuG1812G0100001291
TuG1812G0100001312
TuG1812G0100001320
TuG1812G0100001321
TuG1812G0100001346
TuG1812G0100001348
TuG1812G0100001441
TuG1812G0100001498
TuG1812G0100001508
TuG1812G0100001510
TuG1812G0100001537
TuG1812G0100001541
TuG1812G0100001542
TuG1812G0100001556
TuG1812G0100001576
TuG1812G0100001595
TuG1812G0100001611
TuG1812G0100001617
TuG1812G0100001648
TuG1812G0100001695
TuG1812G0100001696
TuG1812G0100001698
TuG1812G0100001711
TuG1812G0100001807
TuG1812G0100001811
TuG1812G0100001825
TuG1812G0100001838
TuG1812G0100001841
TuG1812G0100001852
TuG1812G0100001861
TuG1812G0100001864
TuG1812G0100001865
TuG1812G0100001885
TuG1812G0100001906
TuG1812G0100001938
TuG1812G0100001986
TuG1812G0100002000
TuG1812G0100002008
TuG1812G0100002057
TuG1812G0100002059
TuG1812G0100002078
TuG1812G0100002081
TuG1812G0100002083
TuG1812G0100002094
TuG1812G0100002104
TuG1812G0100002129
TuG1812G0100002135
TuG1812G0100002136
TuG1812G0100002152
TuG1812G0100002163
TuG1812G0100002168
TuG1812G0100002183
TuG1812G0100002188
TuG1812G0100002193
TuG1812G0100002199
TuG1812G0100002220
TuG1812G0100002227
TuG1812G0100002236
TuG1812G0100002247
TuG1812G0100002267
TuG1812G0100002268
TuG1812G0100002273
TuG1812G0100002289
TuG1812G0100002290
TuG1812G0100002308
TuG1812G0100002360
TuG1812G0100002369
TuG1812G0100002370
TuG1812G0100002376
TuG1812G0100002388
TuG1812G0100002407
TuG1812G0100002419
TuG1812G0100002420
TuG1812G0100002453
TuG1812G0100002471
TuG1812G0100002478
TuG1812G0100002496
TuG1812G0100002497
TuG1812G0100002501
TuG1812G0100002504
TuG1812G0100002508
TuG1812G0100002512
TuG1812G0100002517
TuG1812G0100002518
TuG1812G0100002530
TuG1812G0100002533
TuG1812G0100002547
TuG1812G0100002560
TuG1812G0100002561
TuG1812G0100002562
TuG1812G0100002571
TuG1812G0100002577
TuG1812G0100002580
TuG1812G0100002581
TuG1812G0100002588
TuG1812G0100002590
TuG1812G0100002595
TuG1812G0100002596
TuG1812G0100002605
TuG1812G0100002654
TuG1812G0100002656
TuG1812G0100002659
TuG1812G0100002669
TuG1812G0100002672
TuG1812G0100002680
TuG1812G0100002705
TuG1812G0100002709
TuG1812G0100002747
TuG1812G0100002749
TuG1812G0100002753
TuG1812G0100002755
TuG1812G0100002802
TuG1812G0100002803
TuG1812G0100002827
TuG1812G0100002834
TuG1812G0100002841
TuG1812G0100002843
TuG1812G0100002887
TuG1812G0100002894
TuG1812G0100002918
TuG1812G0100002946
TuG1812G0100002951
TuG1812G0100002958
TuG1812G0100002966
TuG1812G0100003001
TuG1812G0100003002
TuG1812G0100003005
TuG1812G0100003025
TuG1812G0100003034
TuG1812G0100003039
TuG1812G0100003042
TuG1812G0100003060
TuG1812G0100003068
TuG1812G0100003073
TuG1812G0100003082
TuG1812G0100003084
TuG1812G0100003088
TuG1812G0100003091
TuG1812G0100003098
TuG1812G0100003102
TuG1812G0100003105
TuG1812G0100003107
TuG1812G0100003118
TuG1812G0100003131
TuG1812G0100003132
TuG1812G0100003142
TuG1812G0100003144
TuG1812G0100003159
TuG1812G0100003162
TuG1812G0100003163
TuG1812G0100003185
TuG1812G0100003190
TuG1812G0100003200
TuG1812G0100003211
TuG1812G0100003233
TuG1812G0100003242
TuG1812G0100003266
TuG1812G0100003284
TuG1812G0100003293
TuG1812G0100003304
TuG1812G0100003374
TuG1812G0100003378
TuG1812G0100003383
TuG1812G0100003424
TuG1812G0100003442
TuG1812G0100003504
TuG1812G0100003549
TuG1812G0100003555
TuG1812G0100003557
TuG1812G0100003580
TuG1812G0100003596
TuG1812G0100003635
TuG1812G0100003636
TuG1812G0100003661
TuG1812G0100003717
TuG1812G0100003722
TuG1812G0100003748
TuG1812G0100003753
TuG1812G0100003759
TuG1812G0100003764
TuG1812G0100003818
TuG1812G0100003819
TuG1812G0100003823
TuG1812G0100003825
TuG1812G0100003827
TuG1812G0100003847
TuG1812G0100003886
TuG1812G0100003900
TuG1812G0100003903
TuG1812G0100003949
TuG1812G0100003976
TuG1812G0100003980
TuG1812G0100003999
TuG1812G0100004017
TuG1812G0100004018
TuG1812G0100004046
TuG1812G0100004048
TuG1812G0100004060
TuG1812G0100004062
TuG1812G0100004098
TuG1812G0100004099
TuG1812G0100004130
TuG1812G0100004131
TuG1812G0100004132
TuG1812G0100004133
TuG1812G0100004157
TuG1812G0100004165
TuG1812G0100004187
TuG1812G0100004215
TuG1812G0100004239
TuG1812G0100004248
TuG1812G0100004264
TuG1812G0100004274
TuG1812G0100004283
TuG1812G0100004284
TuG1812G0100004292
TuG1812G0100004351
TuG1812G0100004355
TuG1812G0100004356
TuG1812G0100004380
TuG1812G0100004403
TuG1812G0100004436
TuG1812G0100004441
TuG1812G0100004466
TuG1812G0100004470
TuG1812G0100004480
TuG1812G0100004494
TuG1812G0100004515
TuG1812G0100004555
TuG1812G0100004593
TuG1812G0100004620
TuG1812G0100004629
TuG1812G0100004667
TuG1812G0100004695
TuG1812G0100004701
TuG1812G0100004737
TuG1812G0100004742
TuG1812G0100004770
TuG1812G0100004789
TuG1812G0100004795
TuG1812G0100004836
TuG1812G0100004858
TuG1812G0100004873
TuG1812G0100004876
TuG1812G0200000003
TuG1812G0200000019
TuG1812G0200000020
TuG1812G0200000028
TuG1812G0200000030
TuG1812G0200000032
TuG1812G0200000041
TuG1812G0200000051
TuG1812G0200000087
TuG1812G0200000097
TuG1812G0200000103
TuG1812G0200000108
TuG1812G0200000119
TuG1812G0200000138
TuG1812G0200000156
TuG1812G0200000161
TuG1812G0200000162
TuG1812G0200000167
TuG1812G0200000192
TuG1812G0200000250
TuG1812G0200000277
TuG1812G0200000314
TuG1812G0200000351
TuG1812G0200000358
TuG1812G0200000372
TuG1812G0200000393
TuG1812G0200000398
TuG1812G0200000404
TuG1812G0200000405
TuG1812G0200000410
TuG1812G0200000416
TuG1812G0200000420
TuG1812G0200000422
TuG1812G0200000427
TuG1812G0200000429
TuG1812G0200000437
TuG1812G0200000450
TuG1812G0200000466
TuG1812G0200000480
TuG1812G0200000491
TuG1812G0200000526
TuG1812G0200000569
TuG1812G0200000575
TuG1812G0200000591
TuG1812G0200000634
TuG1812G0200000667
TuG1812G0200000678
TuG1812G0200000687
TuG1812G0200000719
TuG1812G0200000725
TuG1812G0200000769
TuG1812G0200000779
TuG1812G0200000827
TuG1812G0200000833
TuG1812G0200000839
TuG1812G0200000842
TuG1812G0200000850
TuG1812G0200000851
TuG1812G0200000857
TuG1812G0200000874
TuG1812G0200000875
TuG1812G0200000876
TuG1812G0200000878
TuG1812G0200000883
TuG1812G0200000912
TuG1812G0200000955
TuG1812G0200000961
TuG1812G0200000986
TuG1812G0200000987
TuG1812G0200000993
TuG1812G0200001038
TuG1812G0200001044
TuG1812G0200001051
TuG1812G0200001106
TuG1812G0200001166
TuG1812G0200001172
TuG1812G0200001186
TuG1812G0200001201
TuG1812G0200001202
TuG1812G0200001211
TuG1812G0200001243
TuG1812G0200001251
TuG1812G0200001272
TuG1812G0200001279
TuG1812G0200001289
TuG1812G0200001302
TuG1812G0200001303
TuG1812G0200001306
TuG1812G0200001308
TuG1812G0200001309
TuG1812G0200001310
TuG1812G0200001326
TuG1812G0200001349
TuG1812G0200001363
TuG1812G0200001383
TuG1812G0200001401
TuG1812G0200001413
TuG1812G0200001415
TuG1812G0200001443
TuG1812G0200001488
TuG1812G0200001528
TuG1812G0200001560
TuG1812G0200001563
TuG1812G0200001609
TuG1812G0200001610
TuG1812G0200001619
TuG1812G0200001647
TuG1812G0200001658
TuG1812G0200001694
TuG1812G0200001698
TuG1812G0200001721
TuG1812G0200001724
TuG1812G0200001727
TuG1812G0200001735
TuG1812G0200001737
TuG1812G0200001749
TuG1812G0200001753
TuG1812G0200001754
TuG1812G0200001756
TuG1812G0200001762
TuG1812G0200001763
TuG1812G0200001764
TuG1812G0200001765
TuG1812G0200001766
TuG1812G0200001768
TuG1812G0200001769
TuG1812G0200001776
TuG1812G0200001819
TuG1812G0200001823
TuG1812G0200001835
TuG1812G0200001839
TuG1812G0200001845
TuG1812G0200001848
TuG1812G0200001866
TuG1812G0200001879
TuG1812G0200001887
TuG1812G0200001908
TuG1812G0200001909
TuG1812G0200001914
TuG1812G0200001918
TuG1812G0200001923
TuG1812G0200001932
TuG1812G0200001972
TuG1812G0200002007
TuG1812G0200002009
TuG1812G0200002011
TuG1812G0200002027
TuG1812G0200002041
TuG1812G0200002042
TuG1812G0200002051
TuG1812G0200002062
TuG1812G0200002074
TuG1812G0200002088
TuG1812G0200002100
TuG1812G0200002130
TuG1812G0200002144
TuG1812G0200002147
TuG1812G0200002148
TuG1812G0200002149
TuG1812G0200002164
TuG1812G0200002187
TuG1812G0200002194
TuG1812G0200002233
TuG1812G0200002235
TuG1812G0200002236
TuG1812G0200002237
TuG1812G0200002243
TuG1812G0200002255
TuG1812G0200002256
TuG1812G0200002260
TuG1812G0200002261
TuG1812G0200002287
TuG1812G0200002302
TuG1812G0200002333
TuG1812G0200002351
TuG1812G0200002357
TuG1812G0200002408
TuG1812G0200002409
TuG1812G0200002451
TuG1812G0200002456
TuG1812G0200002457
TuG1812G0200002497
TuG1812G0200002532
TuG1812G0200002553
TuG1812G0200002588
TuG1812G0200002595
TuG1812G0200002606
TuG1812G0200002666
TuG1812G0200002669
TuG1812G0200002708
TuG1812G0200002710
TuG1812G0200002713
TuG1812G0200002726
TuG1812G0200002739
TuG1812G0200002758
TuG1812G0200002768
TuG1812G0200002773
TuG1812G0200002821
TuG1812G0200002833
TuG1812G0200002836
TuG1812G0200002849
TuG1812G0200002885
TuG1812G0200002910
TuG1812G0200002942
TuG1812G0200002950
TuG1812G0200002958
TuG1812G0200002969
TuG1812G0200002971
TuG1812G0200002975
TuG1812G0200002985
TuG1812G0200003015
TuG1812G0200003025
TuG1812G0200003032
TuG1812G0200003038
TuG1812G0200003045
TuG1812G0200003057
TuG1812G0200003118
TuG1812G0200003128
TuG1812G0200003143
TuG1812G0200003160
TuG1812G0200003171
TuG1812G0200003200
TuG1812G0200003220
TuG1812G0200003239
TuG1812G0200003255
TuG1812G0200003267
TuG1812G0200003282
TuG1812G0200003285
TuG1812G0200003288
TuG1812G0200003312
TuG1812G0200003321
TuG1812G0200003328
TuG1812G0200003330
TuG1812G0200003355
TuG1812G0200003398
TuG1812G0200003409
TuG1812G0200003416
TuG1812G0200003417
TuG1812G0200003422
TuG1812G0200003451
TuG1812G0200003462
TuG1812G0200003476
TuG1812G0200003486
TuG1812G0200003521
TuG1812G0200003560
TuG1812G0200003570
TuG1812G0200003592
TuG1812G0200003594
TuG1812G0200003598
TuG1812G0200003610
TuG1812G0200003611
TuG1812G0200003613
TuG1812G0200003617
TuG1812G0200003642
TuG1812G0200003652
TuG1812G0200003684
TuG1812G0200003685
TuG1812G0200003694
TuG1812G0200003734
TuG1812G0200003745
TuG1812G0200003758
TuG1812G0200003761
TuG1812G0200003772
TuG1812G0200003773
TuG1812G0200003854
TuG1812G0200003855
TuG1812G0200003864
TuG1812G0200003883
TuG1812G0200003897
TuG1812G0200003898
TuG1812G0200003951
TuG1812G0200003952
TuG1812G0200003956
TuG1812G0200003958
TuG1812G0200003965
TuG1812G0200003999
TuG1812G0200004002
TuG1812G0200004018
TuG1812G0200004023
TuG1812G0200004030
TuG1812G0200004040
TuG1812G0200004051
TuG1812G0200004074
TuG1812G0200004087
TuG1812G0200004089
TuG1812G0200004112
TuG1812G0200004126
TuG1812G0200004127
TuG1812G0200004128
TuG1812G0200004146
TuG1812G0200004153
TuG1812G0200004181
TuG1812G0200004191
TuG1812G0200004197
TuG1812G0200004210
TuG1812G0200004219
TuG1812G0200004220
TuG1812G0200004229
TuG1812G0200004234
TuG1812G0200004259
TuG1812G0200004260
TuG1812G0200004262
TuG1812G0200004301
TuG1812G0200004318
TuG1812G0200004325
TuG1812G0200004351
TuG1812G0200004364
TuG1812G0200004368
TuG1812G0200004370
TuG1812G0200004401
TuG1812G0200004402
TuG1812G0200004412
TuG1812G0200004416
TuG1812G0200004417
TuG1812G0200004421
TuG1812G0200004423
TuG1812G0200004451
TuG1812G0200004465
TuG1812G0200004467
TuG1812G0200004493
TuG1812G0200004494
TuG1812G0200004495
TuG1812G0200004497
TuG1812G0200004513
TuG1812G0200004515
TuG1812G0200004517
TuG1812G0200004534
TuG1812G0200004579
TuG1812G0200004580
TuG1812G0200004617
TuG1812G0200004641
TuG1812G0200004643
TuG1812G0200004649
TuG1812G0200004664
TuG1812G0200004667
TuG1812G0200004681
TuG1812G0200004687
TuG1812G0200004696
TuG1812G0200004712
TuG1812G0200004762
TuG1812G0200004774
TuG1812G0200004775
TuG1812G0200004778
TuG1812G0200004789
TuG1812G0200004797
TuG1812G0200004808
TuG1812G0200004817
TuG1812G0200004827
TuG1812G0200004838
TuG1812G0200004865
TuG1812G0200004884
TuG1812G0200004891
TuG1812G0200004935
TuG1812G0200004941
TuG1812G0200004944
TuG1812G0200004961
TuG1812G0200004968
TuG1812G0200004970
TuG1812G0200004981
TuG1812G0200005025
TuG1812G0200005034
TuG1812G0200005036
TuG1812G0200005040
TuG1812G0200005042
TuG1812G0200005055
TuG1812G0200005095
TuG1812G0200005098
TuG1812G0200005125
TuG1812G0200005136
TuG1812G0200005149
TuG1812G0200005156
TuG1812G0200005165
TuG1812G0200005170
TuG1812G0200005174
TuG1812G0200005201
TuG1812G0200005202
TuG1812G0200005229
TuG1812G0200005239
TuG1812G0200005272
TuG1812G0200005274
TuG1812G0200005310
TuG1812G0200005311
TuG1812G0200005326
TuG1812G0200005353
TuG1812G0200005356
TuG1812G0200005370
TuG1812G0200005372
TuG1812G0200005387
TuG1812G0200005392
TuG1812G0200005405
TuG1812G0200005416
TuG1812G0200005427
TuG1812G0200005456
TuG1812G0200005474
TuG1812G0200005479
TuG1812G0200005503
TuG1812G0200005527
TuG1812G0200005529
TuG1812G0200005530
TuG1812G0200005532
TuG1812G0200005534
TuG1812G0200005536
TuG1812G0200005550
TuG1812G0200005553
TuG1812G0200005556
TuG1812G0200005558
TuG1812G0200005576
TuG1812G0200005582
TuG1812G0200005588
TuG1812G0200005590
TuG1812G0200005603
TuG1812G0200005621
TuG1812G0200005624
TuG1812G0200005648
TuG1812G0200005655
TuG1812G0200005658
TuG1812G0200005675
TuG1812G0200005688
TuG1812G0200005705
TuG1812G0200005706
TuG1812G0200005707
TuG1812G0200005715
TuG1812G0200005717
TuG1812G0200005718
TuG1812G0200005733
TuG1812G0200005760
TuG1812G0200005762
TuG1812G0200005764
TuG1812G0200005766
TuG1812G0200005773
TuG1812G0200005774
TuG1812G0200005777
TuG1812G0200005781
TuG1812G0200005810
TuG1812G0200005850
TuG1812G0200005868
TuG1812G0200005874
TuG1812G0200005876
TuG1812G0200005880
TuG1812G0200005884
TuG1812G0200005921
TuG1812G0200005968
TuG1812G0200005971
TuG1812G0200005973
TuG1812G0200005982
TuG1812G0200005995
TuG1812G0200006032
TuG1812G0200006034
TuG1812G0200006051
TuG1812G0200006052
TuG1812G0200006066
TuG1812G0200006094
TuG1812G0200006101
TuG1812G0200006114
TuG1812G0200006115
TuG1812G0200006147
TuG1812G0200006163
TuG1812G0200006166
TuG1812G0200006167
TuG1812G0200006211
TuG1812G0200006214
TuG1812G0200006238
TuG1812G0200006266
TuG1812G0200006294
TuG1812G0200006312
TuG1812G0200006328
TuG1812G0200006340
TuG1812G0200006341
TuG1812G0200006343
TuG1812G0300000085
TuG1812G0300000088
TuG1812G0300000111
TuG1812G0300000116
TuG1812G0300000148
TuG1812G0300000157
TuG1812G0300000169
TuG1812G0300000171
TuG1812G0300000188
TuG1812G0300000192
TuG1812G0300000218
TuG1812G0300000233
TuG1812G0300000257
TuG1812G0300000264
TuG1812G0300000268
TuG1812G0300000382
TuG1812G0300000389
TuG1812G0300000395
TuG1812G0300000413
TuG1812G0300000427
TuG1812G0300000434
TuG1812G0300000441
TuG1812G0300000444
TuG1812G0300000458
TuG1812G0300000467
TuG1812G0300000468
TuG1812G0300000469
TuG1812G0300000485
TuG1812G0300000537
TuG1812G0300000553
TuG1812G0300000559
TuG1812G0300000585
TuG1812G0300000595
TuG1812G0300000600
TuG1812G0300000624
TuG1812G0300000679
TuG1812G0300000726
TuG1812G0300000727
TuG1812G0300000739
TuG1812G0300000821
TuG1812G0300000831
TuG1812G0300000855
TuG1812G0300000859
TuG1812G0300000862
TuG1812G0300000892
TuG1812G0300000904
TuG1812G0300000914
TuG1812G0300000990
TuG1812G0300001015
TuG1812G0300001019
TuG1812G0300001035
TuG1812G0300001058
TuG1812G0300001077
TuG1812G0300001082
TuG1812G0300001098
TuG1812G0300001114
TuG1812G0300001139
TuG1812G0300001140
TuG1812G0300001156
TuG1812G0300001157
TuG1812G0300001171
TuG1812G0300001178
TuG1812G0300001188
TuG1812G0300001201
TuG1812G0300001206
TuG1812G0300001209
TuG1812G0300001221
TuG1812G0300001226
TuG1812G0300001233
TuG1812G0300001235
TuG1812G0300001243
TuG1812G0300001273
TuG1812G0300001274
TuG1812G0300001303
TuG1812G0300001304
TuG1812G0300001306
TuG1812G0300001315
TuG1812G0300001327
TuG1812G0300001343
TuG1812G0300001361
TuG1812G0300001375
TuG1812G0300001388
TuG1812G0300001402
TuG1812G0300001422
TuG1812G0300001465
TuG1812G0300001474
TuG1812G0300001529
TuG1812G0300001533
TuG1812G0300001549
TuG1812G0300001584
TuG1812G0300001602
TuG1812G0300001622
TuG1812G0300001632
TuG1812G0300001644
TuG1812G0300001652
TuG1812G0300001689
TuG1812G0300001690
TuG1812G0300001692
TuG1812G0300001693
TuG1812G0300001714
TuG1812G0300001716
TuG1812G0300001721
TuG1812G0300001732
TuG1812G0300001751
TuG1812G0300001753
TuG1812G0300001762
TuG1812G0300001779
TuG1812G0300001781
TuG1812G0300001791
TuG1812G0300001850
TuG1812G0300001855
TuG1812G0300001915
TuG1812G0300001927
TuG1812G0300001943
TuG1812G0300001972
TuG1812G0300001980
TuG1812G0300001991
TuG1812G0300002009
TuG1812G0300002015
TuG1812G0300002049
TuG1812G0300002085
TuG1812G0300002095
TuG1812G0300002106
TuG1812G0300002109
TuG1812G0300002124
TuG1812G0300002135
TuG1812G0300002147
TuG1812G0300002225
TuG1812G0300002231
TuG1812G0300002237
TuG1812G0300002238
TuG1812G0300002242
TuG1812G0300002275
TuG1812G0300002303
TuG1812G0300002312
TuG1812G0300002313
TuG1812G0300002316
TuG1812G0300002337
TuG1812G0300002348
TuG1812G0300002354
TuG1812G0300002366
TuG1812G0300002395
TuG1812G0300002401
TuG1812G0300002406
TuG1812G0300002417
TuG1812G0300002439
TuG1812G0300002441
TuG1812G0300002491
TuG1812G0300002505
TuG1812G0300002515
TuG1812G0300002520
TuG1812G0300002538
TuG1812G0300002542
TuG1812G0300002557
TuG1812G0300002574
TuG1812G0300002581
TuG1812G0300002588
TuG1812G0300002591
TuG1812G0300002602
TuG1812G0300002654
TuG1812G0300002666
TuG1812G0300002671
TuG1812G0300002682
TuG1812G0300002684
TuG1812G0300002685
TuG1812G0300002705
TuG1812G0300002708
TuG1812G0300002710
TuG1812G0300002736
TuG1812G0300002749
TuG1812G0300002751
TuG1812G0300002755
TuG1812G0300002758
TuG1812G0300002774
TuG1812G0300002786
TuG1812G0300002791
TuG1812G0300002816
TuG1812G0300002827
TuG1812G0300002834
TuG1812G0300002843
TuG1812G0300002844
TuG1812G0300002845
TuG1812G0300002904
TuG1812G0300002910
TuG1812G0300002936
TuG1812G0300002949
TuG1812G0300002954
TuG1812G0300002964
TuG1812G0300002967
TuG1812G0300002981
TuG1812G0300002993
TuG1812G0300002997
TuG1812G0300003018
TuG1812G0300003032
TuG1812G0300003039
TuG1812G0300003040
TuG1812G0300003045
TuG1812G0300003048
TuG1812G0300003058
TuG1812G0300003066
TuG1812G0300003105
TuG1812G0300003120
TuG1812G0300003126
TuG1812G0300003157
TuG1812G0300003162
TuG1812G0300003165
TuG1812G0300003176
TuG1812G0300003185
TuG1812G0300003190
TuG1812G0300003196
TuG1812G0300003214
TuG1812G0300003219
TuG1812G0300003225
TuG1812G0300003226
TuG1812G0300003237
TuG1812G0300003238
TuG1812G0300003241
TuG1812G0300003243
TuG1812G0300003246
TuG1812G0300003247
TuG1812G0300003261
TuG1812G0300003262
TuG1812G0300003264
TuG1812G0300003265
TuG1812G0300003288
TuG1812G0300003296
TuG1812G0300003298
TuG1812G0300003300
TuG1812G0300003303
TuG1812G0300003308
TuG1812G0300003326
TuG1812G0300003343
TuG1812G0300003344
TuG1812G0300003351
TuG1812G0300003358
TuG1812G0300003361
TuG1812G0300003391
TuG1812G0300003401
TuG1812G0300003407
TuG1812G0300003413
TuG1812G0300003450
TuG1812G0300003451
TuG1812G0300003465
TuG1812G0300003476
TuG1812G0300003484
TuG1812G0300003488
TuG1812G0300003501
TuG1812G0300003523
TuG1812G0300003525
TuG1812G0300003527
TuG1812G0300003532
TuG1812G0300003533
TuG1812G0300003553
TuG1812G0300003554
TuG1812G0300003568
TuG1812G0300003569
TuG1812G0300003588
TuG1812G0300003600
TuG1812G0300003603
TuG1812G0300003604
TuG1812G0300003614
TuG1812G0300003622
TuG1812G0300003630
TuG1812G0300003643
TuG1812G0300003651
TuG1812G0300003661
TuG1812G0300003663
TuG1812G0300003664
TuG1812G0300003684
TuG1812G0300003689
TuG1812G0300003712
TuG1812G0300003716
TuG1812G0300003770
TuG1812G0300003773
TuG1812G0300003778
TuG1812G0300003781
TuG1812G0300003787
TuG1812G0300003792
TuG1812G0300003800
TuG1812G0300003806
TuG1812G0300003809
TuG1812G0300003819
TuG1812G0300003826
TuG1812G0300003827
TuG1812G0300003841
TuG1812G0300003855
TuG1812G0300003856
TuG1812G0300003857
TuG1812G0300003866
TuG1812G0300003869
TuG1812G0300003873
TuG1812G0300003874
TuG1812G0300003878
TuG1812G0300003879
TuG1812G0300003883
TuG1812G0300003885
TuG1812G0300003908
TuG1812G0300003912
TuG1812G0300003918
TuG1812G0300003934
TuG1812G0300003941
TuG1812G0300003943
TuG1812G0300003955
TuG1812G0300003962
TuG1812G0300003967
TuG1812G0300004001
TuG1812G0300004008
TuG1812G0300004017
TuG1812G0300004020
TuG1812G0300004021
TuG1812G0300004028
TuG1812G0300004032
TuG1812G0300004033
TuG1812G0300004041
TuG1812G0300004046
TuG1812G0300004056
TuG1812G0300004063
TuG1812G0300004078
TuG1812G0300004083
TuG1812G0300004104
TuG1812G0300004107
TuG1812G0300004108
TuG1812G0300004112
TuG1812G0300004121
TuG1812G0300004125
TuG1812G0300004174
TuG1812G0300004180
TuG1812G0300004183
TuG1812G0300004195
TuG1812G0300004199
TuG1812G0300004205
TuG1812G0300004209
TuG1812G0300004221
TuG1812G0300004238
TuG1812G0300004262
TuG1812G0300004266
TuG1812G0300004269
TuG1812G0300004294
TuG1812G0300004295
TuG1812G0300004302
TuG1812G0300004304
TuG1812G0300004313
TuG1812G0300004321
TuG1812G0300004329
TuG1812G0300004331
TuG1812G0300004332
TuG1812G0300004344
TuG1812G0300004345
TuG1812G0300004350
TuG1812G0300004386
TuG1812G0300004388
TuG1812G0300004399
TuG1812G0300004401
TuG1812G0300004405
TuG1812G0300004406
TuG1812G0300004478
TuG1812G0300004480
TuG1812G0300004485
TuG1812G0300004500
TuG1812G0300004505
TuG1812G0300004506
TuG1812G0300004519
TuG1812G0300004536
TuG1812G0300004537
TuG1812G0300004538
TuG1812G0300004552
TuG1812G0300004568
TuG1812G0300004580
TuG1812G0300004581
TuG1812G0300004594
TuG1812G0300004616
TuG1812G0300004665
TuG1812G0300004679
TuG1812G0300004681
TuG1812G0300004685
TuG1812G0300004703
TuG1812G0300004713
TuG1812G0300004716
TuG1812G0300004721
TuG1812G0300004726
TuG1812G0300004741
TuG1812G0300004755
TuG1812G0300004770
TuG1812G0300004771
TuG1812G0300004799
TuG1812G0300004906
TuG1812G0300004914
TuG1812G0300004954
TuG1812G0300004977
TuG1812G0300004997
TuG1812G0300005000
TuG1812G0300005028
TuG1812G0300005036
TuG1812G0300005048
TuG1812G0300005083
TuG1812G0300005089
TuG1812G0300005091
TuG1812G0300005123
TuG1812G0300005132
TuG1812G0300005134
TuG1812G0300005135
TuG1812G0300005150
TuG1812G0300005178
TuG1812G0300005210
TuG1812G0300005217
TuG1812G0300005219
TuG1812G0300005227
TuG1812G0300005231
TuG1812G0300005232
TuG1812G0300005233
TuG1812G0300005235
TuG1812G0300005236
TuG1812G0300005243
TuG1812G0300005244
TuG1812G0300005246
TuG1812G0300005247
TuG1812G0300005268
TuG1812G0300005275
TuG1812G0300005295
TuG1812G0300005311
TuG1812G0300005313
TuG1812G0300005319
TuG1812G0300005325
TuG1812G0300005342
TuG1812G0300005354
TuG1812G0300005371
TuG1812G0300005375
TuG1812G0300005378
TuG1812G0300005410
TuG1812G0300005414
TuG1812G0300005426
TuG1812G0300005430
TuG1812G0300005432
TuG1812G0300005453
TuG1812G0300005487
TuG1812G0300005549
TuG1812G0300005601
TuG1812G0300005641
TuG1812G0300005682
TuG1812G0300005709
TuG1812G0300005721
TuG1812G0300005748
TuG1812G0300005751
TuG1812G0300005759
TuG1812G0300005769
TuG1812G0300005772
TuG1812G0300005799
TuG1812G0300005814
TuG1812G0300005824
TuG1812G0300005828
TuG1812G0300005835
TuG1812G0300005836
TuG1812G0300005848
TuG1812G0300005875
TuG1812G0300005890
TuG1812G0300005920
TuG1812G0300005924
TuG1812G0400000014
TuG1812G0400000018
TuG1812G0400000019
TuG1812G0400000056
TuG1812G0400000057
TuG1812G0400000067
TuG1812G0400000083
TuG1812G0400000085
TuG1812G0400000113
TuG1812G0400000116
TuG1812G0400000120
TuG1812G0400000131
TuG1812G0400000133
TuG1812G0400000135
TuG1812G0400000136
TuG1812G0400000161
TuG1812G0400000162
TuG1812G0400000170
TuG1812G0400000173
TuG1812G0400000182
TuG1812G0400000183
TuG1812G0400000191
TuG1812G0400000195
TuG1812G0400000196
TuG1812G0400000207
TuG1812G0400000208
TuG1812G0400000213
TuG1812G0400000215
TuG1812G0400000242
TuG1812G0400000244
TuG1812G0400000278
TuG1812G0400000293
TuG1812G0400000309
TuG1812G0400000313
TuG1812G0400000314
TuG1812G0400000315
TuG1812G0400000334
TuG1812G0400000339
TuG1812G0400000350
TuG1812G0400000358
TuG1812G0400000363
TuG1812G0400000384
TuG1812G0400000386
TuG1812G0400000388
TuG1812G0400000389
TuG1812G0400000393
TuG1812G0400000424
TuG1812G0400000426
TuG1812G0400000442
TuG1812G0400000443
TuG1812G0400000451
TuG1812G0400000453
TuG1812G0400000455
TuG1812G0400000476
TuG1812G0400000479
TuG1812G0400000491
TuG1812G0400000493
TuG1812G0400000507
TuG1812G0400000517
TuG1812G0400000534
TuG1812G0400000536
TuG1812G0400000573
TuG1812G0400000576
TuG1812G0400000582
TuG1812G0400000614
TuG1812G0400000619
TuG1812G0400000653
TuG1812G0400000656
TuG1812G0400000662
TuG1812G0400000682
TuG1812G0400000686
TuG1812G0400000709
TuG1812G0400000715
TuG1812G0400000728
TuG1812G0400000738
TuG1812G0400000739
TuG1812G0400000745
TuG1812G0400000765
TuG1812G0400000776
TuG1812G0400000809
TuG1812G0400000820
TuG1812G0400000821
TuG1812G0400000822
TuG1812G0400000846
TuG1812G0400000850
TuG1812G0400000860
TuG1812G0400000864
TuG1812G0400000888
TuG1812G0400000900
TuG1812G0400000901
TuG1812G0400000907
TuG1812G0400000917
TuG1812G0400000926
TuG1812G0400000927
TuG1812G0400000929
TuG1812G0400000934
TuG1812G0400000936
TuG1812G0400000963
TuG1812G0400000993
TuG1812G0400001002
TuG1812G0400001025
TuG1812G0400001039
TuG1812G0400001046
TuG1812G0400001055
TuG1812G0400001080
TuG1812G0400001089
TuG1812G0400001125
TuG1812G0400001138
TuG1812G0400001139
TuG1812G0400001161
TuG1812G0400001171
TuG1812G0400001173
TuG1812G0400001176
TuG1812G0400001196
TuG1812G0400001197
TuG1812G0400001211
TuG1812G0400001240
TuG1812G0400001244
TuG1812G0400001289
TuG1812G0400001313
TuG1812G0400001315
TuG1812G0400001321
TuG1812G0400001358
TuG1812G0400001370
TuG1812G0400001396
TuG1812G0400001418
TuG1812G0400001445
TuG1812G0400001481
TuG1812G0400001522
TuG1812G0400001544
TuG1812G0400001558
TuG1812G0400001568
TuG1812G0400001590
TuG1812G0400001628
TuG1812G0400001630
TuG1812G0400001652
TuG1812G0400001662
TuG1812G0400001667
TuG1812G0400001671
TuG1812G0400001732
TuG1812G0400001760
TuG1812G0400001770
TuG1812G0400001783
TuG1812G0400001785
TuG1812G0400001786
TuG1812G0400001789
TuG1812G0400001792
TuG1812G0400001817
TuG1812G0400001835
TuG1812G0400001854
TuG1812G0400001857
TuG1812G0400001881
TuG1812G0400001895
TuG1812G0400001899
TuG1812G0400001900
TuG1812G0400001915
TuG1812G0400001947
TuG1812G0400002027
TuG1812G0400002082
TuG1812G0400002085
TuG1812G0400002088
TuG1812G0400002101
TuG1812G0400002125
TuG1812G0400002132
TuG1812G0400002138
TuG1812G0400002146
TuG1812G0400002147
TuG1812G0400002149
TuG1812G0400002183
TuG1812G0400002195
TuG1812G0400002225
TuG1812G0400002229
TuG1812G0400002233
TuG1812G0400002235
TuG1812G0400002252
TuG1812G0400002254
TuG1812G0400002299
TuG1812G0400002310
TuG1812G0400002335
TuG1812G0400002346
TuG1812G0400002370
TuG1812G0400002378
TuG1812G0400002404
TuG1812G0400002442
TuG1812G0400002468
TuG1812G0400002473
TuG1812G0400002478
TuG1812G0400002480
TuG1812G0400002517
TuG1812G0400002530
TuG1812G0400002536
TuG1812G0400002547
TuG1812G0400002572
TuG1812G0400002574
TuG1812G0400002575
TuG1812G0400002576
TuG1812G0400002587
TuG1812G0400002595
TuG1812G0400002602
TuG1812G0400002603
TuG1812G0400002610
TuG1812G0400002618
TuG1812G0400002641
TuG1812G0400002642
TuG1812G0400002653
TuG1812G0400002654
TuG1812G0400002657
TuG1812G0400002687
TuG1812G0400002709
TuG1812G0400002721
TuG1812G0400002727
TuG1812G0400002756
TuG1812G0400002787
TuG1812G0400002796
TuG1812G0400002808
TuG1812G0400002825
TuG1812G0400002834
TuG1812G0400002842
TuG1812G0400002844
TuG1812G0400002866
TuG1812G0400002868
TuG1812G0400002878
TuG1812G0400002890
TuG1812G0400002918
TuG1812G0400002963
TuG1812G0400002974
TuG1812G0400002986
TuG1812G0400002988
TuG1812G0400003010
TuG1812G0400003012
TuG1812G0400003018
TuG1812G0400003030
TuG1812G0400003051
TuG1812G0400003053
TuG1812G0400003086
TuG1812G0400003094
TuG1812G0400003102
TuG1812G0400003103
TuG1812G0400003132
TuG1812G0400003147
TuG1812G0400003148
TuG1812G0400003155
TuG1812G0400003162
TuG1812G0400003179
TuG1812G0400003190
TuG1812G0400003192
TuG1812G0400003206
TuG1812G0400003213
TuG1812G0400003217
TuG1812G0400003229
TuG1812G0400003256
TuG1812G0400003257
TuG1812G0400003259
TuG1812G0400003261
TuG1812G0400003265
TuG1812G0400003268
TuG1812G0400003273
TuG1812G0400003293
TuG1812G0400003297
TuG1812G0400003302
TuG1812G0400003313
TuG1812G0400003320
TuG1812G0400003375
TuG1812G0400003390
TuG1812G0400003421
TuG1812G0400003423
TuG1812G0400003426
TuG1812G0400003433
TuG1812G0400003435
TuG1812G0400003436
TuG1812G0400003453
TuG1812G0400003456
TuG1812G0400003487
TuG1812G0400003498
TuG1812G0400003522
TuG1812G0400003535
TuG1812G0400003550
TuG1812G0400003626
TuG1812G0400003632
TuG1812G0400003650
TuG1812G0400003663
TuG1812G0400003673
TuG1812G0400003685
TuG1812G0400003738
TuG1812G0400003740
TuG1812G0400003742
TuG1812G0400003761
TuG1812G0400003789
TuG1812G0400003812
TuG1812G0400003818
TuG1812G0400003830
TuG1812G0400003831
TuG1812G0400003833
TuG1812G0400003844
TuG1812G0400003857
TuG1812G0400003858
TuG1812G0400003861
TuG1812G0400003887
TuG1812G0400003909
TuG1812G0400003910
TuG1812G0400003922
TuG1812G0400003930
TuG1812G0400003966
TuG1812G0400003991
TuG1812G0400004003
TuG1812G0400004033
TuG1812G0500000012
TuG1812G0500000024
TuG1812G0500000029
TuG1812G0500000032
TuG1812G0500000039
TuG1812G0500000073
TuG1812G0500000083
TuG1812G0500000122
TuG1812G0500000136
TuG1812G0500000176
TuG1812G0500000177
TuG1812G0500000217
TuG1812G0500000218
TuG1812G0500000219
TuG1812G0500000237
TuG1812G0500000240
TuG1812G0500000253
TuG1812G0500000318
TuG1812G0500000332
TuG1812G0500000333
TuG1812G0500000342
TuG1812G0500000355
TuG1812G0500000414
TuG1812G0500000415
TuG1812G0500000435
TuG1812G0500000447
TuG1812G0500000464
TuG1812G0500000511
TuG1812G0500000566
TuG1812G0500000571
TuG1812G0500000581
TuG1812G0500000586
TuG1812G0500000587
TuG1812G0500000588
TuG1812G0500000598
TuG1812G0500000607
TuG1812G0500000619
TuG1812G0500000621
TuG1812G0500000625
TuG1812G0500000640
TuG1812G0500000652
TuG1812G0500000672
TuG1812G0500000687
TuG1812G0500000694
TuG1812G0500000701
TuG1812G0500000736
TuG1812G0500000738
TuG1812G0500000741
TuG1812G0500000745
TuG1812G0500000790
TuG1812G0500000795
TuG1812G0500000802
TuG1812G0500000820
TuG1812G0500000836
TuG1812G0500000844
TuG1812G0500000848
TuG1812G0500000856
TuG1812G0500000858
TuG1812G0500000863
TuG1812G0500000882
TuG1812G0500000893
TuG1812G0500000915
TuG1812G0500000938
TuG1812G0500000941
TuG1812G0500000968
TuG1812G0500000969
TuG1812G0500000987
TuG1812G0500001000
TuG1812G0500001012
TuG1812G0500001021
TuG1812G0500001030
TuG1812G0500001052
TuG1812G0500001084
TuG1812G0500001099
TuG1812G0500001171
TuG1812G0500001177
TuG1812G0500001178
TuG1812G0500001181
TuG1812G0500001189
TuG1812G0500001208
TuG1812G0500001215
TuG1812G0500001240
TuG1812G0500001256
TuG1812G0500001265
TuG1812G0500001278
TuG1812G0500001279
TuG1812G0500001282
TuG1812G0500001283
TuG1812G0500001284
TuG1812G0500001285
TuG1812G0500001327
TuG1812G0500001349
TuG1812G0500001411
TuG1812G0500001412
TuG1812G0500001428
TuG1812G0500001430
TuG1812G0500001433
TuG1812G0500001434
TuG1812G0500001435
TuG1812G0500001476
TuG1812G0500001492
TuG1812G0500001524
TuG1812G0500001527
TuG1812G0500001545
TuG1812G0500001560
TuG1812G0500001561
TuG1812G0500001563
TuG1812G0500001589
TuG1812G0500001659
TuG1812G0500001660
TuG1812G0500001697
TuG1812G0500001698
TuG1812G0500001699
TuG1812G0500001705
TuG1812G0500001723
TuG1812G0500001744
TuG1812G0500001760
TuG1812G0500001796
TuG1812G0500001812
TuG1812G0500001820
TuG1812G0500001821
TuG1812G0500001823
TuG1812G0500001824
TuG1812G0500001852
TuG1812G0500001854
TuG1812G0500001867
TuG1812G0500001911
TuG1812G0500001923
TuG1812G0500001926
TuG1812G0500001935
TuG1812G0500001944
TuG1812G0500001956
TuG1812G0500001969
TuG1812G0500001983
TuG1812G0500001987
TuG1812G0500001989
TuG1812G0500001992
TuG1812G0500002001
TuG1812G0500002015
TuG1812G0500002026
TuG1812G0500002040
TuG1812G0500002054
TuG1812G0500002055
TuG1812G0500002105
TuG1812G0500002119
TuG1812G0500002140
TuG1812G0500002182
TuG1812G0500002189
TuG1812G0500002193
TuG1812G0500002195
TuG1812G0500002227
TuG1812G0500002230
TuG1812G0500002244
TuG1812G0500002253
TuG1812G0500002259
TuG1812G0500002266
TuG1812G0500002278
TuG1812G0500002282
TuG1812G0500002288
TuG1812G0500002297
TuG1812G0500002300
TuG1812G0500002324
TuG1812G0500002331
TuG1812G0500002333
TuG1812G0500002335
TuG1812G0500002346
TuG1812G0500002350
TuG1812G0500002355
TuG1812G0500002371
TuG1812G0500002373
TuG1812G0500002375
TuG1812G0500002386
TuG1812G0500002399
TuG1812G0500002409
TuG1812G0500002427
TuG1812G0500002432
TuG1812G0500002449
TuG1812G0500002460
TuG1812G0500002461
TuG1812G0500002489
TuG1812G0500002499
TuG1812G0500002521
TuG1812G0500002522
TuG1812G0500002523
TuG1812G0500002544
TuG1812G0500002549
TuG1812G0500002569
TuG1812G0500002573
TuG1812G0500002575
TuG1812G0500002577
TuG1812G0500002578
TuG1812G0500002582
TuG1812G0500002585
TuG1812G0500002589
TuG1812G0500002591
TuG1812G0500002619
TuG1812G0500002621
TuG1812G0500002625
TuG1812G0500002627
TuG1812G0500002630
TuG1812G0500002635
TuG1812G0500002638
TuG1812G0500002639
TuG1812G0500002649
TuG1812G0500002662
TuG1812G0500002676
TuG1812G0500002716
TuG1812G0500002717
TuG1812G0500002718
TuG1812G0500002726
TuG1812G0500002758
TuG1812G0500002773
TuG1812G0500002783
TuG1812G0500002823
TuG1812G0500002824
TuG1812G0500002841
TuG1812G0500002846
TuG1812G0500002849
TuG1812G0500002864
TuG1812G0500002870
TuG1812G0500002875
TuG1812G0500002876
TuG1812G0500002877
TuG1812G0500002879
TuG1812G0500002891
TuG1812G0500002896
TuG1812G0500002935
TuG1812G0500002936
TuG1812G0500002945
TuG1812G0500002986
TuG1812G0500002988
TuG1812G0500003019
TuG1812G0500003041
TuG1812G0500003062
TuG1812G0500003071
TuG1812G0500003080
TuG1812G0500003096
TuG1812G0500003151
TuG1812G0500003152
TuG1812G0500003158
TuG1812G0500003164
TuG1812G0500003176
TuG1812G0500003252
TuG1812G0500003264
TuG1812G0500003265
TuG1812G0500003273
TuG1812G0500003274
TuG1812G0500003302
TuG1812G0500003309
TuG1812G0500003333
TuG1812G0500003352
TuG1812G0500003356
TuG1812G0500003365
TuG1812G0500003368
TuG1812G0500003374
TuG1812G0500003377
TuG1812G0500003402
TuG1812G0500003409
TuG1812G0500003421
TuG1812G0500003428
TuG1812G0500003452
TuG1812G0500003456
TuG1812G0500003487
TuG1812G0500003491
TuG1812G0500003501
TuG1812G0500003507
TuG1812G0500003509
TuG1812G0500003522
TuG1812G0500003531
TuG1812G0500003570
TuG1812G0500003581
TuG1812G0500003587
TuG1812G0500003593
TuG1812G0500003594
TuG1812G0500003595
TuG1812G0500003596
TuG1812G0500003597
TuG1812G0500003598
TuG1812G0500003600
TuG1812G0500003603
TuG1812G0500003611
TuG1812G0500003629
TuG1812G0500003632
TuG1812G0500003646
TuG1812G0500003652
TuG1812G0500003653
TuG1812G0500003659
TuG1812G0500003667
TuG1812G0500003669
TuG1812G0500003679
TuG1812G0500003706
TuG1812G0500003714
TuG1812G0500003745
TuG1812G0500003755
TuG1812G0500003770
TuG1812G0500003815
TuG1812G0500003834
TuG1812G0500003888
TuG1812G0500003900
TuG1812G0500003914
TuG1812G0500003949
TuG1812G0500003974
TuG1812G0500003985
TuG1812G0500003986
TuG1812G0500003993
TuG1812G0500004003
TuG1812G0500004011
TuG1812G0500004022
TuG1812G0500004023
TuG1812G0500004029
TuG1812G0500004031
TuG1812G0500004039
TuG1812G0500004062
TuG1812G0500004066
TuG1812G0500004067
TuG1812G0500004077
TuG1812G0500004098
TuG1812G0500004099
TuG1812G0500004101
TuG1812G0500004130
TuG1812G0500004136
TuG1812G0500004139
TuG1812G0500004146
TuG1812G0500004182
TuG1812G0500004183
TuG1812G0500004186
TuG1812G0500004187
TuG1812G0500004213
TuG1812G0500004235
TuG1812G0500004246
TuG1812G0500004266
TuG1812G0500004290
TuG1812G0500004293
TuG1812G0500004314
TuG1812G0500004316
TuG1812G0500004321
TuG1812G0500004327
TuG1812G0500004334
TuG1812G0500004343
TuG1812G0500004344
TuG1812G0500004353
TuG1812G0500004362
TuG1812G0500004386
TuG1812G0500004419
TuG1812G0500004428
TuG1812G0500004472
TuG1812G0500004485
TuG1812G0500004486
TuG1812G0500004487
TuG1812G0500004497
TuG1812G0500004501
TuG1812G0500004551
TuG1812G0500004576
TuG1812G0500004586
TuG1812G0500004600
TuG1812G0500004607
TuG1812G0500004617
TuG1812G0500004621
TuG1812G0500004673
TuG1812G0500004689
TuG1812G0500004725
TuG1812G0500004744
TuG1812G0500004807
TuG1812G0500004809
TuG1812G0500004830
TuG1812G0500004848
TuG1812G0500004851
TuG1812G0500004902
TuG1812G0500004916
TuG1812G0500004939
TuG1812G0500004949
TuG1812G0500004954
TuG1812G0500004956
TuG1812G0500004997
TuG1812G0500004999
TuG1812G0500005007
TuG1812G0500005009
TuG1812G0500005011
TuG1812G0500005028
TuG1812G0500005038
TuG1812G0500005051
TuG1812G0500005052
TuG1812G0500005056
TuG1812G0500005089
TuG1812G0500005129
TuG1812G0500005135
TuG1812G0500005142
TuG1812G0500005144
TuG1812G0500005170
TuG1812G0500005171
TuG1812G0500005172
TuG1812G0500005184
TuG1812G0500005211
TuG1812G0500005212
TuG1812G0500005215
TuG1812G0500005229
TuG1812G0500005230
TuG1812G0500005234
TuG1812G0500005243
TuG1812G0500005248
TuG1812G0500005264
TuG1812G0500005265
TuG1812G0500005269
TuG1812G0500005272
TuG1812G0500005280
TuG1812G0500005320
TuG1812G0500005322
TuG1812G0500005335
TuG1812G0500005353
TuG1812G0500005367
TuG1812G0500005399
TuG1812G0500005400
TuG1812G0500005408
TuG1812G0500005413
TuG1812G0500005417
TuG1812G0500005418
TuG1812G0500005427
TuG1812G0500005456
TuG1812G0500005457
TuG1812G0500005461
TuG1812G0500005484
TuG1812G0500005488
TuG1812G0500005489
TuG1812G0500005508
TuG1812G0500005511
TuG1812G0500005517
TuG1812G0500005534
TuG1812G0500005538
TuG1812G0500005542
TuG1812G0500005551
TuG1812G0500005577
TuG1812G0500005581
TuG1812G0500005594
TuG1812G0500005595
TuG1812G0500005716
TuG1812G0600000019
TuG1812G0600000046
TuG1812G0600000047
TuG1812G0600000064
TuG1812G0600000065
TuG1812G0600000139
TuG1812G0600000140
TuG1812G0600000141
TuG1812G0600000143
[truncated: 973 more rows]

## Sheet: O. sativa-common
Supplemental Table S3C. List of genes commonly induced in O. sativa.
GeneID
Os01g0104200
Os01g0104400
Os01g0105800
Os01g0108400
Os01g0108600
Os01g0110400
Os01g0112500
Os01g0113200
Os01g0114100
Os01g0115900
Os01g0118000
Os01g0118700
Os01g0120700
Os01g0128100
Os01g0129500
Os01g0130900
Os01g0132000
Os01g0134700
Os01g0135900
Os01g0138900
Os01g0143800
Os01g0149800
Os01g0151500
Os01g0151700
Os01g0155000
Os01g0159300
Os01g0159400
Os01g0159800
Os01g0160100
Os01g0160700
Os01g0160800
Os01g0163000
Os01g0167400
Os01g0167900
Os01g0168100
Os01g0168200
Os01g0170000
Os01g0171800
Os01g0172400
Os01g0173900
Os01g0175100
Os01g0176000
Os01g0176200
Os01g0177900
Os01g0179000
Os01g0179600
Os01g0179800
Os01g0180000
Os01g0182400
Os01g0183000
Os01g0184100
Os01g0184200
Os01g0186900
Os01g0187900
Os01g0188100
Os01g0190000
Os01g0192000
Os01g0197400
Os01g0198500
Os01g0198900
Os01g0199400
Os01g0201800
Os01g0201900
Os01g0203400
Os01g0203800
Os01g0211600
Os01g0214500
Os01g0214600
Os01g0222700
Os01g0225000
Os01g0225600
Os01g0227100
Os01g0242600
Os01g0243000
Os01g0243200
Os01g0246400
Os01g0246700
Os01g0247500
Os01g0248500
Os01g0249200
Os01g0253900
Os01g0256500
Os01g0261100
Os01g0261200
Os01g0264000
Os01g0265100
Os01g0265200
Os01g0266800
Os01g0278000
Os01g0280500
Os01g0281100
Os01g0282800
Os01g0283500
Os01g0294700
Os01g0295700
Os01g0297200
Os01g0303300
Os01g0303600
Os01g0303800
Os01g0304400
Os01g0305200
Os01g0314100
Os01g0314800
Os01g0315800
Os01g0319000
Os01g0326000
Os01g0326300
Os01g0327100
Os01g0327900
Os01g0332100
Os01g0350100
Os01g0350300
Os01g0360200
Os01g0361500
Os01g0362100
Os01g0369700
Os01g0375200
Os01g0375500
Os01g0379400
Os01g0383900
Os01g0389700
Os01g0498300
Os01g0507700
Os01g0508000
Os01g0531400
Os01g0531500
Os01g0532300
Os01g0534900
Os01g0548600
Os01g0557100
Os01g0559000
Os01g0570800
Os01g0582600
Os01g0583100
Os01g0591000
Os01g0597800
Os01g0600500
Os01g0606133
Os01g0606900
Os01g0607200
Os01g0609000
Os01g0609200
Os01g0609300
Os01g0612500
Os01g0615050
Os01g0615100
Os01g0619900
Os01g0623200
Os01g0627400
Os01g0627500
Os01g0627800
Os01g0638000
Os01g0639200
Os01g0639600
Os01g0642000
Os01g0644000
Os01g0645000
Os01g0654100
Os01g0654400
Os01g0656200
Os01g0658900
Os01g0661500
Os01g0662600
Os01g0665900
Os01g0666000
Os01g0667100
Os01g0667200
Os01g0667800
Os01g0667900
Os01g0668100
Os01g0670800
Os01g0674700
Os01g0680400
Os01g0683550
Os01g0684900
Os01g0687800
Os01g0692100
Os01g0693400
Os01g0694100
Os01g0699100
Os01g0699400
Os01g0699500
Os01g0699600
Os01g0699900
Os01g0700000
Os01g0705200
Os01g0708900
Os01g0711600
Os01g0716500
Os01g0717000
Os01g0718000
Os01g0719000
Os01g0719100
Os01g0719300
Os01g0723700
Os01g0725800
Os01g0727800
Os01g0730200
Os01g0730500
Os01g0731100
Os01g0731600
Os01g0733200
Os01g0733500
Os01g0734600
Os01g0738400
Os01g0739200
Os01g0742400
Os01g0743500
Os01g0743800
Os01g0745700
Os01g0750000
Os01g0750500
Os01g0753100
Os01g0753800
Os01g0754200
Os01g0756600
Os01g0757200
Os01g0757500
Os01g0758200
Os01g0759400
Os01g0764800
Os01g0767600
Os01g0770200
Os01g0771000
Os01g0771200
Os01g0772400
Os01g0782200
Os01g0783200
Os01g0783500
Os01g0787000
Os01g0793800
Os01g0793900
Os01g0794400
Os01g0794500
Os01g0795200
Os01g0797600
Os01g0800500
Os01g0801600
Os01g0805400
Os01g0805900
Os01g0808100
Os01g0810300
Os01g0812200
Os01g0812900
Os01g0815400
Os01g0816100
Os01g0817000
Os01g0817100
Os01g0817650
Os01g0818000
Os01g0819000
Os01g0821300
Os01g0823100
Os01g0823600
Os01g0825800
Os01g0826400
Os01g0827300
Os01g0832600
Os01g0833400
Os01g0833600
Os01g0836800
Os01g0837000
Os01g0839100
Os01g0840100
Os01g0841000
Os01g0841600
Os01g0842400
Os01g0842600
Os01g0844800
Os01g0846300
Os01g0847700
Os01g0848200
Os01g0848900
Os01g0850100
Os01g0850900
Os01g0858350
Os01g0860601
Os01g0866400
Os01g0867300
Os01g0868000
Os01g0869000
Os01g0869900
Os01g0874300
Os01g0876300
Os01g0876400
Os01g0879500
Os01g0883800
Os01g0884300
Os01g0885300
Os01g0892600
Os01g0898300
Os01g0898800
Os01g0900800
Os01g0905200
Os01g0906000
Os01g0908700
Os01g0916400
Os01g0919900
Os01g0922700
Os01g0923000
Os01g0925000
Os01g0926400
Os01g0926600
Os01g0927000
Os01g0930800
Os01g0934400
Os01g0934800
Os01g0934900
Os01g0937100
Os01g0938100
Os01g0938200
Os01g0940000
Os01g0951200
Os01g0951400
Os01g0954000
Os01g0954500
Os01g0955100
Os01g0955700
Os01g0960200
Os01g0962100
Os01g0966300
Os01g0966900
Os01g0971800
Os01g0971900
Os01g0972000
Os01g0973500
Os01g0973600
Os01g0974400
Os01g0976300
Os02g0101000
Os02g0102300
Os02g0103600
Os02g0106100
Os02g0106600
Os02g0110700
Os02g0115900
Os02g0118200
Os02g0121700
Os02g0125300
Os02g0126400
Os02g0134200
Os02g0134300
Os02g0139000
Os02g0139100
Os02g0148000
Os02g0149800
Os02g0150900
Os02g0152900
Os02g0158300
Os02g0160200
Os02g0168100
Os02g0168200
Os02g0171100
Os02g0173900
Os02g0176000
Os02g0178800
Os02g0181300
Os02g0182700
Os02g0182850
Os02g0187700
Os02g0188000
Os02g0189400
Os02g0191300
Os02g0193100
Os02g0194100
Os02g0194700
Os02g0201300
Os02g0203000
Os02g0205500
Os02g0215700
Os02g0218600
Os02g0220400
Os02g0226300
Os02g0229800
Os02g0232000
Os02g0232900
Os02g0240100
Os02g0244600
Os02g0249300
Os02g0249700
Os02g0259850
Os02g0259900
Os02g0260200
Os02g0266800
Os02g0270200
Os02g0273000
Os02g0274100
Os02g0274900
Os02g0282100
Os02g0294100
Os02g0302200
Os02g0313700
Os02g0322400
Os02g0325600
Os02g0329800
Os02g0330200
Os02g0467600
Os02g0483500
Os02g0484200
Os02g0485000
Os02g0491400
Os02g0508100
Os02g0513000
Os02g0513100
Os02g0527200
Os02g0527300
Os02g0532900
Os02g0538700
Os02g0541325
Os02g0551100
Os02g0555300
Os02g0558100
Os02g0564000
Os02g0566300
Os02g0567200
Os02g0572400
Os02g0574500
Os02g0579000
Os02g0581400
Os02g0581500
Os02g0588500
Os02g0592400
Os02g0592833
Os02g0594900
Os02g0595900
Os02g0602100
Os02g0605600
Os02g0606200
Os02g0608600
Os02g0611200
Os02g0612000
Os02g0612900
Os02g0613900
Os02g0614200
Os02g0618100
Os02g0618400
Os02g0619600
Os02g0621300
Os02g0621800
Os02g0623300
Os02g0623932
Os02g0624100
Os02g0624300
Os02g0625300
Os02g0626600
Os02g0627100
Os02g0629000
Os02g0629200
Os02g0631000
Os02g0631200
Os02g0635200
Os02g0637000
Os02g0640800
Os02g0644100
Os02g0645600
Os02g0649300
Os02g0653900
Os02g0654100
Os02g0655100
Os02g0655200
Os02g0657000
Os02g0658200
Os02g0658800
Os02g0661100
Os02g0664000
Os02g0666200
Os02g0667300
Os02g0668000
Os02g0669100
Os02g0670400
Os02g0670900
Os02g0676800
Os02g0677300
Os02g0678200
Os02g0682300
Os02g0684400
Os02g0685200
Os02g0685900
Os02g0686700
Os02g0687200
Os02g0687900
Os02g0692700
Os02g0693000
Os02g0693400
Os02g0695200
Os02g0695600
Os02g0695800
Os02g0696700
Os02g0697400
Os02g0700400
Os02g0703600
Os02g0705500
Os02g0709600
Os02g0711900
Os02g0712500
Os02g0712700
Os02g0713250
Os02g0714200
Os02g0715000
Os02g0716800
Os02g0717500
Os02g0719100
Os02g0719600
Os02g0720600
Os02g0730000
Os02g0730300
Os02g0732600
Os02g0734900
Os02g0736100
Os02g0736300
Os02g0736400
Os02g0738200
Os02g0738400
Os02g0739400
Os02g0739900
Os02g0741700
Os02g0744650
Os02g0748300
Os02g0753300
Os02g0753800
Os02g0755000
Os02g0756800
Os02g0758000
Os02g0759000
Os02g0762600
Os02g0764700
Os02g0766700
Os02g0768300
Os02g0771700
Os02g0771800
Os02g0773200
Os02g0774200
Os02g0781000
Os02g0781400
Os02g0782300
Os02g0782500
Os02g0783700
Os02g0787300
Os02g0788500
Os02g0788800
Os02g0789600
Os02g0791300
Os02g0802500
Os02g0810900
Os02g0813000
Os02g0813166
Os02g0813350
Os02g0813600
Os02g0814000
Os02g0816600
Os02g0817700
Os02g0819400
Os02g0823900
Os02g0827400
Os02g0828200
Os02g0828500
Os02g0832400
Os03g0101000
Os03g0103300
Os03g0103950
Os03g0105800
Os03g0109300
Os03g0111200
Os03g0111300
Os03g0113000
Os03g0113700
Os03g0114800
Os03g0116700
Os03g0116800
Os03g0118800
Os03g0119300
Os03g0119500
Os03g0122300
Os03g0123500
Os03g0125100
Os03g0128200
Os03g0130300
Os03g0131100
Os03g0131200
Os03g0132200
Os03g0133400
Os03g0136900
Os03g0140100
Os03g0142500
Os03g0143400
Os03g0146400
Os03g0146600
Os03g0148400
Os03g0152000
Os03g0153400
Os03g0153500
Os03g0153900
Os03g0154000
Os03g0156700
Os03g0159100
Os03g0159900
Os03g0161500
Os03g0161900
Os03g0162900
Os03g0167500
Os03g0178400
Os03g0178500
Os03g0181800
Os03g0183500
Os03g0184100
Os03g0188100
Os03g0192600
Os03g0195100
Os03g0195800
Os03g0197000
Os03g0197100
Os03g0205800
Os03g0206600
Os03g0207400
Os03g0210600
Os03g0215700
Os03g0218400
Os03g0218500
Os03g0221200
Os03g0221800
Os03g0225900
Os03g0226200
Os03g0228200
Os03g0230300
Os03g0232800
Os03g0233900
Os03g0236200
Os03g0237500
Os03g0238600
Os03g0240600
Os03g0241900
Os03g0242200
Os03g0245800
Os03g0247900
Os03g0248200
Os03g0249700
Os03g0250200
Os03g0255200
Os03g0257600
Os03g0264000
Os03g0264300
Os03g0264400
Os03g0266300
Os03g0266700
Os03g0266900
Os03g0267000
Os03g0267200
Os03g0268600
Os03g0268900
Os03g0269900
Os03g0270000
Os03g0270500
Os03g0270700
Os03g0271200
Os03g0271400
Os03g0271600
Os03g0273800
Os03g0274300
Os03g0276500
Os03g0277300
Os03g0279000
Os03g0279200
Os03g0280400
Os03g0283100
Os03g0283200
Os03g0285800
Os03g0286200
Os03g0286900
Os03g0287100
Os03g0287400
Os03g0287800
Os03g0289800
Os03g0290300
Os03g0291500
Os03g0292100
Os03g0295800
Os03g0299200
Os03g0299600
Os03g0300400
Os03g0300600
Os03g0300700
Os03g0302800
Os03g0304800
Os03g0305000
Os03g0305100
Os03g0305400
Os03g0305600
Os03g0314800
Os03g0315400
Os03g0316200
Os03g0318400
Os03g0321300
Os03g0325000
Os03g0327600
Os03g0327800
Os03g0329500
Os03g0330200
Os03g0331700
Os03g0334200
Os03g0335600
Os03g0339300
Os03g0340500
Os03g0341300
Os03g0347900
Os03g0348200
Os03g0351100
Os03g0352200
Os03g0362200
Os03g0363100
Os03g0366000
Os03g0370600
Os03g0374500
Os03g0374600
Os03g0375300
Os03g0379300
Os03g0381300
Os03g0382100
Os03g0385400
Os03g0386000
Os03g0388600
Os03g0388800
Os03g0390200
Os03g0395000
Os03g0397600
Os03g0402800
Os03g0405100
Os03g0407900
Os03g0412300
Os03g0416200
Os03g0426900
Os03g0432900
Os03g0445700
Os03g0564200
Os03g0565300
Os03g0571900
Os03g0572900
Os03g0575200
Os03g0580200
Os03g0581650
Os03g0593600
Os03g0594900
Os03g0609500
Os03g0610400
Os03g0610700
Os03g0611200
Os03g0626500
Os03g0626700
Os03g0626800
Os03g0633800
Os03g0638900
Os03g0640400
Os03g0643300
Os03g0650900
Os03g0654700
Os03g0656800
Os03g0659400
Os03g0661600
Os03g0663500
Os03g0669300
Os03g0685600
Os03g0688200
Os03g0689300
Os03g0689900
Os03g0693400
Os03g0693700
Os03g0694000
Os03g0698350
Os03g0700400
Os03g0703000
Os03g0709000
Os03g0709300
Os03g0710000
Os03g0712800
Os03g0719100
Os03g0721300
Os03g0722500
Os03g0723400
Os03g0724100
Os03g0729000
Os03g0730000
Os03g0734700
Os03g0736300
Os03g0738600
Os03g0739700
Os03g0741100
Os03g0743500
Os03g0744700
Os03g0745550
Os03g0745600
Os03g0746900
Os03g0747900
Os03g0749300
Os03g0749500
Os03g0751600
Os03g0754500
Os03g0756500
Os03g0757100
Os03g0757200
Os03g0757600
Os03g0760000
Os03g0760200
Os03g0760300
Os03g0760700
Os03g0760800
Os03g0764100
Os03g0764600
Os03g0766800
Os03g0767800
Os03g0767900
Os03g0770800
Os03g0773700
Os03g0775200
Os03g0775300
Os03g0775700
Os03g0780800
Os03g0786500
Os03g0787300
Os03g0788200
Os03g0790500
Os03g0792800
Os03g0793800
Os03g0800500
Os03g0802100
Os03g0802500
Os03g0803500
Os03g0804400
Os03g0804700
Os03g0804900
Os03g0805100
Os03g0806600
Os03g0807100
Os03g0808900
Os03g0817800
Os03g0819400
Os03g0820300
Os03g0820400
Os03g0820500
Os03g0821100
Os03g0822700
Os03g0825500
Os03g0826800
Os03g0829100
Os03g0829200
Os03g0830500
Os03g0832200
Os03g0832600
Os03g0833700
Os03g0834050
Os03g0839800
Os03g0842700
Os03g0844700
Os03g0845000
Os03g0845500
Os03g0848700
Os03g0849500
Os03g0849800
Os03g0849900
Os03g0850900
Os03g0852400
Os03g0856000
Os03g0857900
Os03g0860600
Os04g0108300
Os04g0116600
Os04g0136700
Os04g0171800
Os04g0182200
Os04g0184100
Os04g0191600
Os04g0201800
Os04g0206600
Os04g0206700
Os04g0210800
Os04g0223300
Os04g0223500
Os04g0229100
Os04g0233400
Os04g0244400
Os04g0244800
Os04g0253000
Os04g0271700
Os04g0272200
Os04g0272700
Os04g0301500
Os04g0301700
Os04g0306800
Os04g0321800
Os04g0338000
Os04g0339400
Os04g0340300
Os04g0344100
Os04g0345400
Os04g0352400
Os04g0357700
Os04g0373400
Os04g0390000
Os04g0395800
Os04g0398000
Os04g0398600
Os04g0402500
Os04g0404900
Os04g0405100
Os04g0405300
Os04g0405800
Os04g0406600
Os04g0412300
Os04g0415800
Os04g0430600
Os04g0435500
Os04g0437000
Os04g0445700
Os04g0447100
Os04g0447700
Os04g0450900
Os04g0456700
Os04g0456900
Os04g0460300
Os04g0460600
Os04g0470100
Os04g0470700
Os04g0471300
Os04g0474500
Os04g0475600
Os04g0476100
Os04g0480700
Os04g0482300
Os04g0483200
Os04g0483600
Os04g0486900
Os04g0486950
Os04g0487100
Os04g0488000
Os04g0488700
Os04g0493100
Os04g0493400
Os04g0496400
Os04g0497000
Os04g0502900
Os04g0504000
Os04g0508300
Os04g0508500
Os04g0508800
Os04g0511200
Os04g0513400
Os04g0514600
Os04g0515900
Os04g0517100
Os04g0517500
Os04g0518000
Os04g0518400
Os04g0520700
Os04g0521700
Os04g0523600
Os04g0524500
Os04g0527400
Os04g0527700
Os04g0529100
Os04g0531400
Os04g0533900
Os04g0538000
Os04g0540900
Os04g0541100
Os04g0541700
Os04g0545100
Os04g0548700
Os04g0549700
Os04g0549800
Os04g0550200
Os04g0555000
Os04g0555300
Os04g0559700
Os04g0563900
Os04g0564700
Os04g0565200
Os04g0570500
Os04g0571600
Os04g0573000
Os04g0573100
Os04g0578400
Os04g0578550
Os04g0579200
Os04g0580300
Os04g0581100
Os04g0583200
Os04g0583900
Os04g0584600
Os04g0586100
Os04g0586700
Os04g0587500
Os04g0588700
Os04g0591100
Os04g0593600
Os04g0593700
Os04g0593800
Os04g0600200
Os04g0600300
Os04g0602300
Os04g0603400
Os04g0605500
Os04g0606000
Os04g0609600
Os04g0613000
Os04g0613900
Os04g0614500
Os04g0614600
Os04g0615100
Os04g0616900
Os04g0618200
Os04g0618700
Os04g0623300
Os04g0623500
Os04g0631600
Os04g0632600
Os04g0633300
Os04g0634800
Os04g0635000
Os04g0635500
Os04g0639200
Os04g0650900
Os04g0652700
Os04g0663300
Os04g0671200
Os04g0674700
Os04g0676700
Os04g0678400
Os04g0679200
Os04g0683600
Os04g0685500
Os04g0691900
Os05g0100600
Os05g0102600
Os05g0102800
Os05g0104900
Os05g0105200
Os05g0107900
Os05g0110000
Os05g0112000
Os05g0112800
Os05g0122700
Os05g0125500
Os05g0126200
Os05g0127500
Os05g0128200
Os05g0128400
Os05g0129300
Os05g0130100
Os05g0131900
Os05g0134200
Os05g0135500
Os05g0136200
Os05g0137300
Os05g0139200
Os05g0140300
Os05g0141700
Os05g0142100
Os05g0142200
Os05g0151200
Os05g0159300
Os05g0163300
Os05g0163700
Os05g0163900
Os05g0170200
Os05g0171200
Os05g0171900
Os05g0175800
Os05g0176700
Os05g0177000
Os05g0177500
Os05g0179800
Os05g0179950
Os05g0185800
Os05g0186100
Os05g0186300
Os05g0190300
Os05g0190500
Os05g0191500
Os05g0192100
Os05g0195200
Os05g0196100
Os05g0200280
Os05g0206100
Os05g0209600
Os05g0215300
Os05g0221200
Os05g0231700
Os05g0299500
Os05g0302700
Os05g0304900
Os05g0316200
Os05g0324100
Os05g0332300
Os05g0343400
Os05g0353600
Os05g0373400
Os05g0373900
Os05g0380900
Os05g0381400
Os05g0383200
Os05g0386800
Os05g0389400
Os05g0391500
Os05g0399400
Os05g0402700
Os05g0402900
Os05g0407100
Os05g0407500
Os05g0410200
Os05g0411200
Os05g0426000
Os05g0429900
Os05g0432700
Os05g0437900
Os05g0438600
Os05g0438800
Os05g0443500
Os05g0444200
Os05g0445100
Os05g0446900
Os05g0453500
Os05g0454500
Os05g0455500
Os05g0456300
Os05g0456925
Os05g0459300
Os05g0460000
Os05g0460475
Os05g0461900
Os05g0464200
Os05g0469600
Os05g0469800
Os05g0470700
Os05g0471000
Os05g0472700
Os05g0475400
Os05g0477600
Os05g0478400
Os05g0481500
Os05g0484800
Os05g0487300
Os05g0489200
Os05g0490400
Os05g0490500
Os05g0493800
Os05g0495700
Os05g0495900
Os05g0497300
Os05g0498800
Os05g0501400
Os05g0501700
Os05g0506000
Os05g0508300
Os05g0508400
Os05g0510100
Os05g0510600
Os05g0511500
Os05g0514200
Os05g0515200
Os05g0515400
Os05g0516700
Os05g0516800
Os05g0517500
Os05g0519700
Os05g0521300
Os05g0522600
Os05g0523300
Os05g0524200
Os05g0525900
Os05g0526700
Os05g0529700
Os05g0534400
Os05g0535400
Os05g0535900
Os05g0536400
Os05g0536900
Os05g0537400
Os05g0539600
Os05g0539800
Os05g0540300
Os05g0540900
Os05g0541400
Os05g0542500
Os05g0542732
Os05g0542800
Os05g0542900
Os05g0543100
Os05g0545300
Os05g0545400
Os05g0549800
Os05g0550000
Os05g0550300
Os05g0550600
Os05g0550800
Os05g0554400
Os05g0555100
Os05g0556300
Os05g0557100
Os05g0559400
Os05g0561500
Os05g0562200
Os05g0562300
Os05g0563400
Os05g0563600
Os05g0564800
Os05g0566800
Os05g0568100
Os05g0568600
Os05g0569300
Os05g0569500
Os05g0571200
Os05g0571400
Os05g0572700
Os05g0573300
Os05g0574100
Os05g0574600
Os05g0575000
Os05g0578100
Os05g0578500
Os05g0579000
Os05g0582500
Os05g0582800
Os05g0586400
Os05g0586600
Os05g0587000
Os05g0587200
Os05g0591600
Os05g0594700
Os05g0595100
Os06g0102100
Os06g0103200
Os06g0103300
Os06g0104300
Os06g0109600
Os06g0110200
Os06g0114000
Os06g0116400
Os06g0118700
Os06g0127100
Os06g0129100
Os06g0129400
Os06g0131700
Os06g0133400
Os06g0133500
Os06g0133900
Os06g0134900
Os06g0138600
Os06g0141600
Os06g0142050
Os06g0142200
Os06g0142300
Os06g0143700
Os06g0150400
Os06g0154900
Os06g0158900
Os06g0160700
Os06g0166400
Os06g0166900
Os06g0167400
Os06g0168500
Os06g0168700
Os06g0172800
Os06g0178900
Os06g0179200
Os06g0181100
Os06g0181200
Os06g0181500
Os06g0183100
Os06g0187900
Os06g0192800
Os06g0193400
Os06g0195800
Os06g0195900
Os06g0196700
Os06g0196900
Os06g0203600
Os06g0203800
Os06g0207200
Os06g0208800
Os06g0210000
Os06g0211200
Os06g0211300
Os06g0215500
Os06g0215900
Os06g0216200
Os06g0220000
Os06g0221200
Os06g0221300
Os06g0225800
Os06g0231300
Os06g0232000
Os06g0234600
Os06g0236300
Os06g0244000
Os06g0246500
Os06g0248500
Os06g0254300
Os06g0256800
Os06g0258000
Os06g0270200
Os06g0274800
Os06g0288300
Os06g0289900
Os06g0300500
Os06g0306600
Os06g0309000
Os06g0318600
Os06g0324400
Os06g0326400
Os06g0336200
Os06g0341300
Os06g0343600
Os06g0345200
Os06g0354700
Os06g0470000
Os06g0472400
Os06g0476200
Os06g0486800
Os06g0494400
Os06g0496800
Os06g0497200
Os06g0497350
Os06g0497600
Os06g0503400
Os06g0506200
Os06g0528600
Os06g0531900
Os06g0543400
Os06g0546500
Os06g0547400
Os06g0549600
Os06g0549900
Os06g0554600
Os06g0556300
Os06g0557400
Os06g0562200
Os06g0564500
Os06g0564700
Os06g0593800
Os06g0604600
Os06g0613500
Os06g0623600
Os06g0625900
Os06g0633100
Os06g0634300
Os06g0635200
Os06g0637500
Os06g0638700
Os06g0640800
Os06g0641500
Os06g0642500
Os06g0644200
Os06g0646700
Os06g0649000
Os06g0649700
Os06g0650900
Os06g0651000
Os06g0661200
Os06g0661500
Os06g0662200
Os06g0669700
Os06g0670100
Os06g0670300
Os06g0672400
Os06g0674800
Os06g0675600
Os06g0677000
Os06g0677300
Os06g0682900
Os06g0685200
Os06g0686400
Os06g0687800
Os06g0694200
Os06g0695200
Os06g0695400
Os06g0695500
Os06g0695600
Os06g0696400
Os06g0696600
Os06g0697000
Os06g0698300
Os06g0700700
Os06g0703800
Os06g0707200
Os06g0710700
Os06g0711800
Os06g0713800
Os06g0714600
Os06g0714900
Os06g0716000
Os06g0724900
Os06g0725000
Os06g0726100
Os06g0726200
Os06g0728700
Os06g0729000
Os06g0729900
Os06g0730300
Os07g0100200
Os07g0118900
Os07g0119300
Os07g0122900
Os07g0123100
Os07g0124750
Os07g0129300
Os07g0130200
Os07g0132500
Os07g0141100
Os07g0147550
Os07g0158300
Os07g0159900
Os07g0164800
Os07g0169600
Os07g0174700
Os07g0174900
Os07g0175600
Os07g0178700
Os07g0179300
Os07g0179400
Os07g0186000
Os07g0187200
Os07g0191200
Os07g0192000
Os07g0195300
Os07g0196300
Os07g0200700
Os07g0204100
Os07g0208900
Os07g0209100
Os07g0224900
Os07g0229100
Os07g0229200
Os07g0241500
Os07g0241700
Os07g0245100
Os07g0258400
Os07g0274700
Os07g0418500
Os07g0422100
Os07g0425000
Os07g0442900
Os07g0448100
Os07g0448800
Os07g0456700
Os07g0462200
Os07g0463600
Os07g0464200
Os07g0489300
Os07g0499800
Os07g0502200
Os07g0503300
Os07g0503500
Os07g0510400
Os07g0510500
Os07g0522500
Os07g0523600
Os07g0529000
Os07g0529800
Os07g0535200
Os07g0535800
Os07g0537900
Os07g0545100
Os07g0545800
Os07g0546000
Os07g0549800
Os07g0557100
Os07g0559400
Os07g0563400
Os07g0568300
Os07g0570550
Os07g0573400
Os07g0575900
Os07g0584100
Os07g0586100
Os07g0586200
Os07g0586800
Os07g0589000
Os07g0592100
Os07g0592600
Os07g0597200
Os07g0599900
Os07g0601600
Os07g0602700
Os07g0604300
Os07g0604600
Os07g0605800
Os07g0606800
Os07g0606900
Os07g0607700
Os07g0614000
Os07g0614300
Os07g0618700
Os07g0619500
Os07g0619600
Os07g0622000
Os07g0622700
Os07g0625800
Os07g0627000
Os07g0629000
Os07g0633100
Os07g0633400
Os07g0634400
Os07g0635500
Os07g0635900
Os07g0637300
Os07g0640000
Os07g0641700
Os07g0643000
Os07g0643700
Os07g0644200
Os07g0656600
Os07g0657400
Os07g0658100
Os07g0659400
Os07g0660500
Os07g0661400
Os07g0663500
Os07g0664600
Os07g0665200
Os07g0666900
Os07g0668100
Os07g0671800
Os07g0672600
Os07g0672700
Os07g0673900
Os07g0677100
Os07g0678300
Os07g0679300
Os07g0680000
Os07g0680600
Os07g0682700
Os07g0683600
Os07g0683900
Os07g0684000
Os07g0684800
Os07g0685500
Os07g0686800
Os07g0687900
Os07g0688200
Os07g0693500
Os07g0693800
Os07g0695300
Os08g0102700
Os08g0104400
Os08g0104600
Os08g0104700
Os08g0104900
Os08g0105100
Os08g0105700
Os08g0105800
Os08g0107300
Os08g0107500
Os08g0109000
Os08g0109800
Os08g0110400
Os08g0110700
Os08g0113300
Os08g0114300
Os08g0117900
Os08g0121900
Os08g0126300
Os08g0127100
Os08g0137400
Os08g0137800
Os08g0137900
Os08g0138100
Os08g0138200
Os08g0139700
Os08g0140300
Os08g0140500
Os08g0143600
Os08g0143700
Os08g0149100
Os08g0156600
Os08g0158200
Os08g0158400
Os08g0158500
Os08g0160500
Os08g0167800
Os08g0168000
Os08g0169300
Os08g0170800
Os08g0189100
Os08g0189200
Os08g0189600
Os08g0189700
Os08g0189850
Os08g0189900
Os08g0191100
Os08g0197900
Os08g0207500
Os08g0231400
Os08g0240000
Os08g0249000
Os08g0269000
Os08g0270400
Os08g0280100
Os08g0280600
Os08g0289000
Os08g0290700
Os08g0293100
Os08g0298700
Os08g0299400
Os08g0301500
Os08g0321000
Os08g0331000
Os08g0331800
Os08g0337001
Os08g0345700
Os08g0386200
Os08g0387200
Os08g0389700
Os08g0390200
Os08g0390700
Os08g0392100
Os08g0393600
Os08g0398700
Os08g0398800
Os08g0402500
Os08g0417000
Os08g0420700
Os08g0424500
Os08g0425000
Os08g0428100
Os08g0434100
Os08g0437300
Os08g0441100
Os08g0446200
Os08g0448000
Os08g0457400
Os08g0457600
Os08g0465800
Os08g0470200
Os08g0471900
Os08g0472800
Os08g0473900
Os08g0474000
Os08g0476900
Os08g0477100
Os08g0480200
Os08g0481100
Os08g0482600
Os08g0483100
Os08g0484200
Os08g0485400
Os08g0487800
Os08g0489300
Os08g0492500
Os08g0497900
Os08g0498100
Os08g0498400
Os08g0499300
Os08g0500700
Os08g0500800
Os08g0503700
Os08g0504700
Os08g0508500
Os08g0511900
Os08g0512700
Os08g0517700
Os08g0518100
Os08g0520600
Os08g0524200
Os08g0525600
Os08g0525900
Os08g0529300
Os08g0532800
Os08g0536800
Os08g0540400
Os08g0542700
Os08g0543400
Os08g0544400
Os08g0544900
Os08g0546800
Os08g0550400
Os08g0551300
Os08g0551366
Os08g0557600
Os08g0557800
Os08g0557900
Os08g0558100
Os08g0560000
Os08g0561700
Os08g0564100
Os08g0564300
Os09g0106700
Os09g0115900
Os09g0123300
Os09g0129500
Os09g0129600
Os09g0129800
Os09g0133600
Os09g0135700
Os09g0248100
Os09g0249400
Os09g0255400
Os09g0270900
Os09g0272000
Os09g0272300
Os09g0277800
Os09g0307300
Os09g0322000
Os09g0323500
Os09g0327550
Os09g0334500
Os09g0344500
Os09g0344800
Os09g0363500
Os09g0375000
Os09g0379600
Os09g0379900
Os09g0381100
Os09g0385700
Os09g0392000
Os09g0396900
Os09g0403000
Os09g0408600
Os09g0420900
Os09g0423500
Os09g0433000
Os09g0433800
Os09g0437500
Os09g0438700
Os09g0439200
Os09g0439800
Os09g0440300
Os09g0442100
Os09g0442400
Os09g0442600
Os09g0448200
Os09g0451400
Os09g0453400
Os09g0454600
Os09g0455900
Os09g0457100
Os09g0457900
Os09g0460300
Os09g0464000
Os09g0467400
Os09g0469300
Os09g0471100
Os09g0471200
Os09g0472100
Os09g0474300
Os09g0478600
Os09g0481300
Os09g0484800
Os09g0484900
Os09g0486500
Os09g0489200
Os09g0491660
Os09g0491708
Os09g0491772
Os09g0491788
Os09g0491820
Os09g0491852
Os09g0492700
Os09g0493000
Os09g0498500
Os09g0504000
Os09g0506000
Os09g0511600
Os09g0518000
Os09g0518200
Os09g0520100
Os09g0520200
Os09g0522000
Os09g0525300
Os09g0526600
Os09g0527600
Os09g0529900
Os09g0532000
Os09g0532400
Os09g0533900
Os09g0534800
Os09g0538000
Os09g0538400
Os09g0542900
Os09g0544400
Os09g0545300
Os09g0545400
Os09g0546700
Os09g0547000
Os09g0552600
Os09g0554000
Os09g0554300
Os09g0555500
Os09g0556400
Os09g0556700
Os09g0557500
Os09g0558900
Os09g0563200
Os09g0565700
Os09g0567300
Os09g0569100
Os09g0570850
Os09g0572400
Os09g0572700
Os10g0101200
Os10g0122000
Os10g0125300
Os10g0126000
Os10g0127900
Os10g0135600
Os10g0136100
Os10g0145200
Os10g0150400
Os10g0166600
Os10g0173000
Os10g0177200
Os10g0178500
Os10g0190100
Os10g0204400
Os10g0325400
Os10g0343200
Os10g0344900
Os10g0345100
Os10g0360100
Os10g0368100
Os10g0376900
Os10g0377000
Os10g0389100
Os10g0389200
Os10g0389300
Os10g0389500
Os10g0390500
Os10g0391200
Os10g0391400
Os10g0393800
Os10g0397400
Os10g0406300
Os10g0409400
Os10g0416500
Os10g0416800
Os10g0417600
Os10g0419300
Os10g0419500
Os10g0430200
Os10g0442800
Os10g0462900
Os10g0468500
Os10g0469600
Os10g0485500
Os10g0489900
Os10g0490800
Os10g0490900
Os10g0491000
Os10g0492900
Os10g0494800
Os10g0495400
Os10g0496900
Os10g0499400
Os10g0499500
Os10g0499800
Os10g0501500
Os10g0503300
Os10g0505700
Os10g0505900
Os10g0506100
Os10g0515200
Os10g0516300
Os10g0517500
Os10g0520100
Os10g0521000
Os10g0521900
Os10g0522601
Os10g0523700
Os10g0524600
Os10g0524700
Os10g0525000
Os10g0525800
Os10g0527400
Os10g0527800
Os10g0527900
Os10g0528100
Os10g0528200
Os10g0528300
Os10g0528400
Os10g0528900
Os10g0529300
Os10g0529400
Os10g0529500
Os10g0529800
Os10g0530500
Os10g0530900
Os10g0531400
Os10g0532300
Os10g0533500
Os10g0535800
Os10g0537500
Os10g0539900
Os10g0542400
Os10g0542900
Os10g0544200
Os10g0544600
Os10g0545800
Os10g0546400
Os10g0547900
Os10g0548000
Os10g0548100
Os10g0548800
Os10g0553300
Os10g0553800
Os10g0555600
Os10g0555900
Os10g0560400
Os10g0564200
Os10g0564400
Os10g0564500
Os10g0564800
Os10g0571600
Os10g0572300
Os10g0574800
Os10g0576900
Os11g0100300
Os11g0105000
Os11g0106700
Os11g0107400
Os11g0112400
Os11g0113700
Os11g0114600
Os11g0115400
Os11g0116400
Os11g0116550
Os11g0119700
Os11g0123400
Os11g0126100
Os11g0126900
Os11g0127600
Os11g0129000
Os11g0132600
Os11g0133800
Os11g0134700
Os11g0135900
Os11g0136300
Os11g0141400
Os11g0149200
Os11g0149400
Os11g0153000
Os11g0153300
Os11g0155600
Os11g0159900
Os11g0160000
Os11g0173800
Os11g0177400
Os11g0180000
Os11g0181500
Os11g0182200
Os11g0184900
Os11g0195600
Os11g0198200
Os11g0202000
Os11g0202300
Os11g0210300
Os11g0212900
Os11g0213000
Os11g0213700
Os11g0213800
Os11g0244200
Os11g0246600
Os11g0249000
Os11g0255500
Os11g0260100
Os11g0261900
Os11g0283500
Os11g0289700
Os11g0303600
Os11g0427800
Os11g0432900
Os11g0441500
Os11g0444000
Os11g0453900
Os11g0454000
Os11g0454200
Os11g0454300
Os11g0483000
Os11g0498600
Os11g0521000
Os11g0530600
Os11g0532600
Os11g0533400
Os11g0536800
Os11g0540600
Os11g0545300
Os11g0546600
Os11g0547000
Os11g0548600
Os11g0558400
Os11g0569500
Os11g0576400
Os11g0576900
Os11g0582700
Os11g0591200
Os11g0592000
Os11g0592100
Os11g0592200
Os11g0605500
Os11g0614500
Os11g0615800
Os11g0634200
[truncated: 99 more rows]

## Sheet: O. sativa-unique
Supplemental Table S3D. List of genes uniquely induced in O. sativa.
GeneID
Os01g0100400
Os01g0100800
Os01g0102300
Os01g0102850
Os01g0102900
Os01g0104350
Os01g0104600
Os01g0105700
Os01g0105900
Os01g0106300
Os01g0106400
Os01g0107900
Os01g0108500
Os01g0110100
Os01g0110200
Os01g0111100
Os01g0111600
Os01g0112100
Os01g0112300
Os01g0113300
Os01g0114300
Os01g0118400
Os01g0119000
Os01g0119800
Os01g0120300
Os01g0120600
Os01g0121000
Os01g0121500
Os01g0121600
Os01g0121700
Os01g0122000
Os01g0123900
Os01g0124000
Os01g0124100
Os01g0124200
Os01g0124400
Os01g0124401
Os01g0124600
Os01g0124650
Os01g0125800
Os01g0126100
Os01g0127300
Os01g0127400
Os01g0127450
Os01g0127600
Os01g0127900
Os01g0128200
Os01g0128300
Os01g0128700
Os01g0130000
Os01g0132500
Os01g0132766
Os01g0133100
Os01g0133500
Os01g0134900
Os01g0135700
Os01g0135800
Os01g0136000
Os01g0136100
Os01g0136200
Os01g0138400
Os01g0138500
Os01g0138800
Os01g0139600
Os01g0139700
Os01g0139900
Os01g0140500
Os01g0141000
Os01g0142600
Os01g0142800
Os01g0144100
Os01g0144600
Os01g0144800
Os01g0147300
Os01g0148500
Os01g0151600
Os01g0151900
Os01g0152800
Os01g0152951
Os01g0154000
Os01g0155800
Os01g0157800
Os01g0158400
Os01g0159000
Os01g0159200
Os01g0159600
Os01g0164800
Os01g0164900
Os01g0165000
Os01g0166100
Os01g0168000
Os01g0170051
Os01g0172100
Os01g0173000
Os01g0174000
Os01g0174100
Os01g0174300
Os01g0174900
Os01g0176400
Os01g0178300
Os01g0178900
Os01g0180300
Os01g0181000
Os01g0181300
Os01g0182500
Os01g0182832
Os01g0182900
Os01g0183300
Os01g0183600
Os01g0184500
Os01g0184900
Os01g0185300
Os01g0185350
Os01g0185400
Os01g0185900
Os01g0186000
Os01g0187200
Os01g0188900
Os01g0189800
Os01g0190300
Os01g0190400
Os01g0191300
Os01g0191400
Os01g0191700
Os01g0192300
Os01g0192900
Os01g0194300
Os01g0195000
Os01g0195066
Os01g0196300
Os01g0196600
Os01g0197350
Os01g0198000
Os01g0199550
Os01g0200300
Os01g0200350
Os01g0200700
Os01g0201100
Os01g0202500
Os01g0205200
Os01g0205600
Os01g0206200
Os01g0206300
Os01g0206700
Os01g0207400
Os01g0207500
Os01g0209700
Os01g0210500
Os01g0212500
Os01g0212700
Os01g0213400
Os01g0214400
Os01g0217800
Os01g0218700
Os01g0218900
Os01g0219300
Os01g0220500
Os01g0221000
Os01g0221100
Os01g0221500
Os01g0223700
Os01g0223800
Os01g0223900
Os01g0224000
Os01g0224200
Os01g0224400
Os01g0225400
Os01g0225500
Os01g0226400
Os01g0226500
Os01g0226700
Os01g0227200
Os01g0227800
Os01g0228400
Os01g0228500
Os01g0229100
Os01g0229400
Os01g0229600
Os01g0232000
Os01g0233000
Os01g0233900
Os01g0234900
Os01g0235100
Os01g0235350
Os01g0235900
Os01g0236000
Os01g0237100
Os01g0238500
Os01g0239100
Os01g0241000
Os01g0241400
Os01g0243100
Os01g0243400
Os01g0246500
Os01g0247600
Os01g0251400
Os01g0252200
Os01g0255000
Os01g0257300
Os01g0258100
Os01g0259933
Os01g0262700
Os01g0263600
Os01g0264500
Os01g0264700
Os01g0264900
Os01g0265900
Os01g0266100
Os01g0266500
Os01g0266600
Os01g0267100
Os01g0269000
Os01g0270100
Os01g0270300
Os01g0271700
Os01g0272600
Os01g0272800
Os01g0272850
Os01g0274800
Os01g0275300
Os01g0275600
Os01g0276000
Os01g0276300
Os01g0276900
Os01g0279100
Os01g0279400
Os01g0279700
Os01g0281600
Os01g0283300
Os01g0284300
Os01g0284500
Os01g0284700
Os01g0284900
Os01g0286900
Os01g0287600
Os01g0288800
Os01g0289600
Os01g0290600
Os01g0290700
Os01g0291500
Os01g0292700
Os01g0296200
Os01g0298400
Os01g0301000
Os01g0301300
Os01g0302100
Os01g0302500
Os01g0306400
Os01g0306800
Os01g0307624
Os01g0307686
Os01g0310100
Os01g0311500
Os01g0311800
Os01g0313300
Os01g0314000
Os01g0316500
Os01g0316550
Os01g0316600
Os01g0323500
Os01g0329400
Os01g0329800
Os01g0329900
Os01g0337900
Os01g0342500
Os01g0342750
Os01g0343300
Os01g0343500
Os01g0347100
Os01g0347600
Os01g0348800
Os01g0348900
Os01g0349000
Os01g0354700
Os01g0356500
Os01g0357100
Os01g0361000
Os01g0363300
Os01g0363500
Os01g0364000
Os01g0366100
Os01g0367400
Os01g0368900
Os01g0369600
Os01g0369900
Os01g0372100
Os01g0373400
Os01g0375000
Os01g0376200
Os01g0378100
Os01g0382700
Os01g0384800
Os01g0385400
Os01g0386500
Os01g0387133
Os01g0388200
Os01g0391100
Os01g0392600
Os01g0393000
Os01g0500825
Os01g0501700
Os01g0501800
Os01g0504100
Os01g0505600
Os01g0506100
Os01g0507000
Os01g0510200
Os01g0510600
Os01g0511100
Os01g0511600
Os01g0513200
Os01g0513400
Os01g0513500
Os01g0518800
Os01g0519050
Os01g0519100
Os01g0521400
Os01g0524100
Os01g0524500
Os01g0524700
Os01g0527400
Os01g0529800
Os01g0530100
Os01g0532700
Os01g0534800
Os01g0535400
Os01g0542700
Os01g0543100
Os01g0543600
Os01g0547400
Os01g0548750
Os01g0552300
Os01g0553901
Os01g0555200
Os01g0555600
Os01g0555800
Os01g0556650
Os01g0556700
Os01g0558100
Os01g0558500
Os01g0558700
Os01g0558800
Os01g0559900
Os01g0561600
Os01g0566000
Os01g0566050
Os01g0566100
Os01g0566500
Os01g0571300
Os01g0572700
Os01g0574600
Os01g0575200
Os01g0578700
Os01g0579600
Os01g0580500
Os01g0583200
Os01g0584100
Os01g0585100
Os01g0585200
Os01g0587300
Os01g0588200
Os01g0589000
Os01g0590700
Os01g0592500
Os01g0593000
Os01g0593200
Os01g0594800
Os01g0595400
Os01g0595600
Os01g0597600
Os01g0601000
Os01g0602200
Os01g0602400
Os01g0603300
Os01g0605400
Os01g0607000
Os01g0607600
Os01g0610800
Os01g0614900
Os01g0617950
Os01g0618000
Os01g0618100
Os01g0619800
Os01g0620100
Os01g0621600
Os01g0621900
Os01g0622300
Os01g0623500
Os01g0625200
Os01g0625300
Os01g0626400
Os01g0627600
Os01g0627900
Os01g0628000
Os01g0628900
Os01g0629400
Os01g0629900
Os01g0630300
Os01g0630900
Os01g0631200
Os01g0631700
Os01g0631800
Os01g0633000
Os01g0633100
Os01g0633400
Os01g0636400
Os01g0636600
Os01g0637500
Os01g0640700
Os01g0642100
Os01g0644200
Os01g0644500
Os01g0644600
Os01g0646000
Os01g0647000
Os01g0647200
Os01g0649200
Os01g0651800
Os01g0652100
Os01g0652300
Os01g0652450
Os01g0652800
Os01g0655500
Os01g0656250
Os01g0658300
Os01g0660200
Os01g0660900
Os01g0661601
Os01g0661750
Os01g0662700
Os01g0664100
Os01g0664500
Os01g0665300
Os01g0665500
Os01g0665750
Os01g0666200
Os01g0666600
Os01g0667000
Os01g0668901
Os01g0670100
Os01g0672100
Os01g0673300
Os01g0673700
Os01g0673900
Os01g0674000
Os01g0675100
Os01g0675800
Os01g0678500
Os01g0679000
Os01g0680700
Os01g0681200
Os01g0681700
Os01g0681800
Os01g0681900
Os01g0682001
Os01g0683400
Os01g0683500
Os01g0683700
Os01g0685400
Os01g0686100
Os01g0686200
Os01g0686400
Os01g0686700
Os01g0687400
Os01g0688200
Os01g0689451
Os01g0691500
Os01g0692000
Os01g0692400
Os01g0693800
Os01g0695100
Os01g0695200
Os01g0695300
Os01g0695800
Os01g0695900
Os01g0696600
Os01g0698000
Os01g0698800
Os01g0701900
Os01g0702000
Os01g0702450
Os01g0702500
Os01g0703300
Os01g0704300
Os01g0704700
Os01g0705100
Os01g0705300
Os01g0705400
Os01g0705700
Os01g0706200
Os01g0706600
Os01g0706700
Os01g0707500
Os01g0708500
Os01g0709750
Os01g0710100
Os01g0711500
Os01g0712500
Os01g0712700
Os01g0714800
Os01g0715400
Os01g0716400
Os01g0716550
Os01g0716800
Os01g0717400
Os01g0718500
Os01g0719125
Os01g0719150
Os01g0719700
Os01g0720400
Os01g0720500
Os01g0720700
Os01g0721000
Os01g0721100
Os01g0723600
Os01g0725600
Os01g0726700
Os01g0727500
Os01g0727700
Os01g0727840
Os01g0728700
Os01g0729900
Os01g0730300
Os01g0730900
Os01g0731800
Os01g0733001
Os01g0734000
Os01g0734800
Os01g0736600
Os01g0738600
Os01g0739500
Os01g0739700
Os01g0740400
Os01g0740700
Os01g0743400
Os01g0743600
Os01g0743666
Os01g0744200
Os01g0747300
Os01g0749000
Os01g0749200
Os01g0750600
Os01g0752500
Os01g0754800
Os01g0755500
Os01g0756300
Os01g0759000
Os01g0760000
Os01g0761100
Os01g0762000
Os01g0763300
Os01g0763900
Os01g0764300
Os01g0765400
Os01g0766200
Os01g0767100
Os01g0767700
Os01g0768333
Os01g0768600
Os01g0769000
Os01g0771100
Os01g0771300
Os01g0772150
Os01g0772500
Os01g0772900
Os01g0773200
Os01g0774200
Os01g0775400
Os01g0777200
Os01g0777300
Os01g0777800
Os01g0777900
Os01g0780600
Os01g0780800
Os01g0780900
Os01g0781100
Os01g0782800
Os01g0783600
Os01g0783700
Os01g0785400
Os01g0786800
Os01g0786900
Os01g0787400
Os01g0788400
Os01g0793500
Os01g0793600
Os01g0794650
Os01g0795600
Os01g0795700
Os01g0796400
Os01g0796500
Os01g0796700
Os01g0800300
Os01g0800800
Os01g0800900
Os01g0801100
Os01g0801200
Os01g0802100
Os01g0802200
Os01g0802600
Os01g0804400
Os01g0805200
Os01g0805500
Os01g0806000
Os01g0806200
Os01g0810100
Os01g0810401
Os01g0812000
Os01g0812100
Os01g0812300
Os01g0814200
Os01g0814700
Os01g0814800
Os01g0815100
Os01g0818300
Os01g0819233
Os01g0819300
Os01g0820400
Os01g0821600
Os01g0822800
Os01g0822900
Os01g0823400
Os01g0823700
Os01g0823900
Os01g0825000
Os01g0829000
Os01g0829900
Os01g0830000
Os01g0830100
Os01g0830300
Os01g0830500
Os01g0833150
Os01g0833200
Os01g0834100
Os01g0834250
Os01g0834700
Os01g0835800
Os01g0836600
Os01g0838600
Os01g0839200
Os01g0839900
Os01g0841200
Os01g0841700
Os01g0842200
Os01g0844300
Os01g0844500
Os01g0846000
Os01g0846400
Os01g0846450
Os01g0846700
Os01g0846800
Os01g0849000
Os01g0850400
Os01g0850700
Os01g0851000
Os01g0851100
Os01g0851700
Os01g0852500
Os01g0853000
Os01g0854000
Os01g0855200
Os01g0855600
Os01g0855900
Os01g0856000
Os01g0857500
Os01g0857700
Os01g0858200
Os01g0858900
Os01g0859100
Os01g0859300
Os01g0860400
Os01g0860500
Os01g0862600
Os01g0862800
Os01g0863300
Os01g0864500
Os01g0866500
Os01g0867400
Os01g0867600
Os01g0871500
Os01g0871600
Os01g0871800
Os01g0871900
Os01g0872600
Os01g0872900
Os01g0873100
Os01g0874700
Os01g0874800
Os01g0874900
Os01g0875500
Os01g0877500
Os01g0878400
Os01g0878700
Os01g0878900
Os01g0879200
Os01g0881800
Os01g0881900
Os01g0882100
Os01g0884900
Os01g0885600
Os01g0885700
Os01g0886350
Os01g0887400
Os01g0888500
Os01g0888800
Os01g0888850
Os01g0888900
Os01g0891000
Os01g0891300
Os01g0891700
Os01g0892800
Os01g0895200
Os01g0895300
Os01g0895500
Os01g0896500
Os01g0898500
Os01g0900200
Os01g0901500
Os01g0901600
Os01g0901700
Os01g0901900
Os01g0902100
Os01g0902200
Os01g0904200
Os01g0905300
Os01g0907200
Os01g0908600
Os01g0909400
Os01g0909500
Os01g0910200
Os01g0910800
Os01g0911300
Os01g0911700
Os01g0912700
Os01g0913400
Os01g0913600
Os01g0914000
Os01g0915000
Os01g0915200
Os01g0915350
Os01g0917200
Os01g0917300
Os01g0918400
Os01g0918500
Os01g0919100
Os01g0919400
Os01g0920450
Os01g0921000
Os01g0921300
Os01g0922600
Os01g0923700
Os01g0925100
Os01g0925200
Os01g0927300
Os01g0928000
Os01g0930500
Os01g0931100
Os01g0931600
Os01g0933600
Os01g0934000
Os01g0934100
Os01g0934200
Os01g0934350
Os01g0935600
Os01g0937000
Os01g0939700
Os01g0940100
Os01g0940600
Os01g0940800
Os01g0941200
Os01g0944100
Os01g0944700
Os01g0944900
Os01g0945001
Os01g0946500
Os01g0946600
Os01g0946700
Os01g0948200
Os01g0948600
Os01g0949300
Os01g0949400
Os01g0949900
Os01g0950900
Os01g0952500
Os01g0952900
Os01g0955000
Os01g0955050
Os01g0956200
Os01g0956700
Os01g0958100
Os01g0959100
Os01g0959200
Os01g0960600
Os01g0961200
Os01g0962000
Os01g0962400
Os01g0963000
Os01g0964000
Os01g0965000
Os01g0965400
Os01g0966100
Os01g0966200
Os01g0967200
Os01g0968800
Os01g0970700
Os01g0971200
Os01g0973000
Os01g0975900
Os01g0976200
Os01g0977100
Os01g0977600
Os02g0100300
Os02g0101300
Os02g0102600
Os02g0102850
Os02g0103700
Os02g0104500
Os02g0104700
Os02g0106700
Os02g0107000
Os02g0109200
Os02g0110200
Os02g0112100
Os02g0112600
Os02g0114400
Os02g0115600
Os02g0117200
Os02g0117600
Os02g0119600
Os02g0120100
Os02g0120800
Os02g0121400
Os02g0122100
Os02g0122300
Os02g0122400
Os02g0122500
Os02g0122900
Os02g0123500
Os02g0123600
Os02g0123800
Os02g0124800
Os02g0125700
Os02g0128200
Os02g0128600
Os02g0129700
Os02g0129800
Os02g0129900
Os02g0130900
Os02g0132200
Os02g0135200
Os02g0136000
Os02g0136150
Os02g0137600
Os02g0137700
Os02g0138900
Os02g0139500
Os02g0139900
Os02g0140200
Os02g0140800
Os02g0141100
Os02g0141300
Os02g0142800
Os02g0143100
Os02g0145000
Os02g0145500
Os02g0146400
Os02g0148500
Os02g0148600
Os02g0149600
Os02g0149900
Os02g0151600
Os02g0153700
Os02g0155400
Os02g0156100
Os02g0156633
Os02g0156800
Os02g0157100
Os02g0158600
Os02g0158900
Os02g0159200
Os02g0160250
Os02g0160500
Os02g0161000
Os02g0161100
Os02g0161800
Os02g0162200
Os02g0162600
Os02g0163300
Os02g0164000
Os02g0166600
Os02g0168800
Os02g0169300
Os02g0170200
Os02g0170900
Os02g0172600
Os02g0173200
Os02g0175000
Os02g0175400
Os02g0175950
Os02g0178100
Os02g0179500
Os02g0179600
Os02g0180200
Os02g0181900
Os02g0182900
Os02g0184300
Os02g0186400
Os02g0188400
Os02g0189000
Os02g0189100
Os02g0189500
Os02g0189566
Os02g0189700
Os02g0190900
Os02g0191600
Os02g0192400
Os02g0192700
Os02g0196100
Os02g0196800
Os02g0197200
Os02g0197600
Os02g0198200
Os02g0198300
Os02g0199500
Os02g0199800
Os02g0201401
Os02g0202200
Os02g0202800
Os02g0202950
Os02g0204201
Os02g0204300
Os02g0204700
Os02g0206700
Os02g0208300
Os02g0209300
Os02g0209400
Os02g0211200
Os02g0211350
Os02g0212500
Os02g0214900
Os02g0215200
Os02g0217900
Os02g0218400
Os02g0218700
Os02g0219800
Os02g0221600
Os02g0223700
Os02g0226350
Os02g0227100
Os02g0230100
Os02g0230250
Os02g0231700
Os02g0232100
Os02g0233100
Os02g0234300
Os02g0234500
Os02g0241100
Os02g0243300
Os02g0245200
Os02g0247800
Os02g0250600
Os02g0251900
Os02g0252600
Os02g0254700
Os02g0256500
Os02g0257200
Os02g0257300
Os02g0257400
Os02g0258800
Os02g0258900
Os02g0259600
Os02g0264700
Os02g0265900
Os02g0266000
Os02g0267000
Os02g0267700
Os02g0269200
Os02g0272400
Os02g0273100
Os02g0273800
Os02g0273900
Os02g0279600
Os02g0280000
Os02g0284800
Os02g0285300
Os02g0290400
Os02g0293350
Os02g0293500
Os02g0299300
Os02g0302700
Os02g0302900
Os02g0305600
Os02g0306401
Os02g0307800
Os02g0308800
Os02g0312750
Os02g0312800
Os02g0313500
Os02g0314300
Os02g0314400
Os02g0314600
Os02g0317500
Os02g0318100
Os02g0321900
Os02g0324400
Os02g0324700
Os02g0327500
Os02g0328300
Os02g0330601
Os02g0332450
Os02g0332700
Os02g0435600
Os02g0453300
Os02g0454300
Os02g0461100
Os02g0461200
Os02g0462000
Os02g0462800
Os02g0463401
Os02g0463500
Os02g0465900
Os02g0466400
Os02g0467300
Os02g0467500
Os02g0468200
Os02g0468400
Os02g0469250
Os02g0469300
Os02g0469900
Os02g0473000
Os02g0473200
Os02g0474000
Os02g0475300
Os02g0475400
Os02g0478500
Os02g0480900
Os02g0481700
Os02g0482400
Os02g0488600
Os02g0489525
Os02g0489550
Os02g0494400
Os02g0497500
Os02g0498666
Os02g0499000
Os02g0501350
Os02g0502850
Os02g0503900
Os02g0504000
Os02g0504050
Os02g0509600
Os02g0510200
Os02g0510600
Os02g0511400
Os02g0515200
Os02g0517300
Os02g0520100
Os02g0521100
Os02g0521366
Os02g0522300
Os02g0522700
Os02g0525100
Os02g0526400
Os02g0526500
Os02g0527600
Os02g0528200
Os02g0528300
Os02g0528500
Os02g0530300
Os02g0530600
Os02g0531600
Os02g0532500
Os02g0533200
Os02g0533700
Os02g0533800
Os02g0535000
Os02g0535700
Os02g0537000
Os02g0537100
Os02g0537200
Os02g0537700
Os02g0537800
Os02g0538900
Os02g0539200
Os02g0539600
Os02g0540400
Os02g0541300
Os02g0541500
Os02g0543100
Os02g0549700
Os02g0551600
Os02g0552100
Os02g0552550
Os02g0553200
Os02g0553500
Os02g0555832
Os02g0555900
Os02g0556000
Os02g0556100
Os02g0556800
Os02g0556900
Os02g0557800
Os02g0558500
Os02g0559800
Os02g0565400
Os02g0565600
Os02g0566000
Os02g0566400
Os02g0566800
Os02g0566900
Os02g0567800
Os02g0567900
Os02g0569900
Os02g0570700
Os02g0570900
Os02g0571100
Os02g0571900
Os02g0572900
Os02g0573200
Os02g0574800
Os02g0574900
Os02g0575000
Os02g0575500
Os02g0575700
Os02g0578000
Os02g0578300
Os02g0579600
Os02g0579800
Os02g0580500
Os02g0580700
Os02g0582600
Os02g0582800
Os02g0584800
Os02g0585100
Os02g0586900
Os02g0588700
Os02g0589000
Os02g0589700
Os02g0590200
Os02g0590700
Os02g0591000
Os02g0591900
Os02g0592200
Os02g0592300
Os02g0592700
Os02g0593500
Os02g0593600
Os02g0595200
Os02g0595300
Os02g0595700
Os02g0596000
Os02g0596700
Os02g0596900
Os02g0597200
Os02g0600200
Os02g0601000
Os02g0604100
Os02g0606000
Os02g0606700
Os02g0606900
Os02g0608550
Os02g0610700
Os02g0611000
Os02g0612100
Os02g0612200
Os02g0612700
Os02g0613200
Os02g0613300
Os02g0617700
Os02g0618250
Os02g0620100
Os02g0620200
Os02g0620400
Os02g0620600
Os02g0621500
Os02g0622500
Os02g0623500
Os02g0625900
Os02g0628100
Os02g0628900
Os02g0629101
Os02g0631100
Os02g0633100
Os02g0633200
Os02g0638900
Os02g0639800
Os02g0640700
Os02g0642300
Os02g0642700
Os02g0643000
Os02g0643500
Os02g0643800
Os02g0644000
Os02g0649400
Os02g0649900
Os02g0650500
Os02g0650900
Os02g0651300
Os02g0651500
Os02g0651900
Os02g0652800
Os02g0654500
Os02g0654600
Os02g0654700
Os02g0655600
Os02g0656100
Os02g0656200
Os02g0658400
Os02g0661900
Os02g0663800
Os02g0668500
Os02g0668700
Os02g0669500
Os02g0669600
Os02g0670000
Os02g0671100
Os02g0671200
Os02g0671800
Os02g0672400
Os02g0672600
Os02g0672700
Os02g0673100
Os02g0674700
Os02g0676500
Os02g0677800
Os02g0681000
Os02g0684000
Os02g0686800
Os02g0689000
Os02g0689700
Os02g0689900
Os02g0690000
Os02g0690200
Os02g0693200
Os02g0696650
Os02g0699000
Os02g0699800
Os02g0699850
Os02g0701700
Os02g0702100
Os02g0702800
Os02g0704300
Os02g0704800
Os02g0704966
Os02g0705000
Os02g0705400
Os02g0706400
Os02g0706500
Os02g0706900
Os02g0707200
Os02g0707900
Os02g0711300
Os02g0712400
Os02g0712550
Os02g0713900
Os02g0714300
Os02g0715400
Os02g0716500
Os02g0718600
Os02g0720400
Os02g0720500
Os02g0724000
Os02g0724100
Os02g0724500
Os02g0725600
Os02g0726500
Os02g0726600
Os02g0727700
Os02g0729100
Os02g0729900
Os02g0731200
Os02g0731300
Os02g0732400
Os02g0732900
Os02g0733300
Os02g0733500
Os02g0733900
Os02g0734800
Os02g0735100
Os02g0735800
Os02g0735900
Os02g0739100
Os02g0740400
Os02g0740500
Os02g0740600
Os02g0740700
Os02g0741400
Os02g0742700
Os02g0742900
Os02g0743200
Os02g0743700
Os02g0744100
Os02g0744200
Os02g0744600
Os02g0744700
Os02g0744900
Os02g0745000
Os02g0745800
Os02g0747500
Os02g0747600
Os02g0751900
Os02g0753000
Os02g0753500
Os02g0753700
Os02g0753850
Os02g0753900
Os02g0754100
Os02g0754300
Os02g0755400
Os02g0755500
Os02g0755600
Os02g0755900
Os02g0756200
Os02g0756600
Os02g0758200
Os02g0758800
Os02g0759400
Os02g0759500
Os02g0759900
Os02g0760600
Os02g0761000
Os02g0761100
Os02g0761200
Os02g0761300
Os02g0761400
Os02g0763800
Os02g0764400
Os02g0767150
Os02g0767200
Os02g0767400
Os02g0768000
Os02g0768600
Os02g0769100
Os02g0769700
Os02g0770800
Os02g0772200
Os02g0773400
Os02g0773732
Os02g0773800
Os02g0774100
Os02g0775900
Os02g0776900
Os02g0777100
Os02g0777800
Os02g0779300
Os02g0780550
Os02g0781700
Os02g0781900
Os02g0783600
Os02g0783625
Os02g0784900
Os02g0786200
Os02g0786300
Os02g0786400
Os02g0787100
Os02g0790500
Os02g0791500
Os02g0791700
Os02g0794000
Os02g0794400
Os02g0794500
Os02g0794600
Os02g0796600
Os02g0796700
Os02g0798700
Os02g0798800
Os02g0798900
Os02g0799000
Os02g0799300
Os02g0799600
Os02g0800000
Os02g0801200
Os02g0803300
Os02g0805100
Os02g0805300
Os02g0805500
Os02g0806000
Os02g0807000
Os02g0808500
Os02g0809500
Os02g0813083
Os02g0813800
Os02g0815200
Os02g0815400
Os02g0815600
Os02g0815700
Os02g0816000
Os02g0816700
Os02g0820500
Os02g0822600
Os02g0823000
Os02g0823050
Os02g0823300
Os02g0823800
Os02g0824400
Os02g0824500
Os02g0826300
Os02g0827300
Os02g0827600
Os02g0828100
Os02g0828533
Os02g0828566
Os02g0828600
Os02g0829000
Os02g0829850
Os02g0832150
Os02g0832500
Os02g0833200
Os02g0833400
Os02g0834700
Os02g0834800
Os03g0100300
Os03g0101600
Os03g0103100
Os03g0103200
Os03g0106000
Os03g0107700
Os03g0108600
Os03g0110500
Os03g0111700
Os03g0113900
Os03g0115200
Os03g0115300
Os03g0115500
Os03g0117100
Os03g0117900
Os03g0118200
Os03g0118450
Os03g0118600
Os03g0120100
Os03g0120200
Os03g0121700
Os03g0122000
Os03g0122200
Os03g0123200
Os03g0123300
Os03g0123800
Os03g0124800
Os03g0124900
Os03g0125300
Os03g0126000
Os03g0126300
Os03g0126800
Os03g0128000
Os03g0128100
Os03g0129100
Os03g0129400
Os03g0131800
Os03g0131900
Os03g0132900
Os03g0133100
Os03g0133300
Os03g0133500
Os03g0133800
Os03g0133900
Os03g0134300
Os03g0134500
Os03g0135800
Os03g0136500
Os03g0136700
Os03g0137400
Os03g0137600
Os03g0138100
Os03g0138900
Os03g0139200
Os03g0140500
Os03g0140650
Os03g0141200
Os03g0142200
Os03g0142600
Os03g0142800
Os03g0144200
Os03g0145500
Os03g0145900
Os03g0146000
Os03g0146100
Os03g0146200
Os03g0148000
Os03g0148800
Os03g0150600
Os03g0150800
Os03g0151201
Os03g0151800
Os03g0152100
Os03g0152600
Os03g0152700
Os03g0153000
Os03g0156600
Os03g0157700
Os03g0157800
Os03g0158600
Os03g0159400
Os03g0159600
Os03g0159700
Os03g0160000
Os03g0160300
Os03g0161000
Os03g0161200
Os03g0161400
Os03g0162500
Os03g0163200
Os03g0163300
Os03g0164300
Os03g0167550
Os03g0167700
Os03g0168000
Os03g0168100
Os03g0168200
Os03g0168300
Os03g0168500
Os03g0170900
Os03g0172100
Os03g0174600
Os03g0175200
Os03g0176700
Os03g0177300
Os03g0178100
Os03g0179700
Os03g0180800
Os03g0180900
Os03g0181100
Os03g0183000
Os03g0183200
Os03g0183800
Os03g0184201
Os03g0184300
Os03g0184550
Os03g0185500
Os03g0187100
Os03g0187200
Os03g0187300
Os03g0187350
Os03g0187400
Os03g0187600
Os03g0187700
Os03g0187800
Os03g0189100
Os03g0190000
Os03g0190100
Os03g0190900
Os03g0191400
Os03g0191900
Os03g0192500
Os03g0192700
Os03g0194600
Os03g0195300
Os03g0195400
Os03g0195450
Os03g0195500
Os03g0197050
Os03g0197200
Os03g0198600
Os03g0199100
Os03g0200200
Os03g0202001
Os03g0203451
Os03g0205000
Os03g0205400
Os03g0206100
Os03g0207800
Os03g0208500
Os03g0210450
Os03g0210500
Os03g0211100
Os03g0211700
Os03g0212800
Os03g0213600
Os03g0213700
Os03g0214200
Os03g0217000
Os03g0218300
Os03g0219900
Os03g0221600
Os03g0222600
Os03g0224200
Os03g0224700
Os03g0225100
Os03g0226600
Os03g0229100
Os03g0229600
Os03g0231000
Os03g0231150
Os03g0231600
Os03g0231900
Os03g0231950
Os03g0232000
Os03g0233000
Os03g0234900
Os03g0237100
Os03g0238700
Os03g0238800
Os03g0240500
Os03g0240700
Os03g0240900
Os03g0241300
Os03g0242100
Os03g0242300
Os03g0243100
Os03g0243200
Os03g0243900
Os03g0244000
Os03g0244200
Os03g0245100
Os03g0246100
Os03g0247200
Os03g0248000
Os03g0248300
Os03g0249500
Os03g0250000
Os03g0251500
Os03g0258200
Os03g0260100
Os03g0261100
Os03g0262200
Os03g0262400
Os03g0263400
Os03g0265200
Os03g0265400
Os03g0265600
Os03g0265800
Os03g0265900
Os03g0268200
Os03g0269000
Os03g0269100
Os03g0269300
Os03g0269950
Os03g0270800
Os03g0271300
Os03g0271350
Os03g0271500
Os03g0274700
Os03g0275300
Os03g0276700
Os03g0277000
Os03g0277500
Os03g0277700
Os03g0279801
Os03g0279950
Os03g0280750
Os03g0280800
Os03g0280900
Os03g0281900
Os03g0283300
Os03g0284500
Os03g0284600
Os03g0285100
Os03g0285166
Os03g0285300
Os03g0286800
Os03g0288700
Os03g0290400
Os03g0290500
Os03g0292700
Os03g0292900
Os03g0293850
Os03g0293900
Os03g0294001
Os03g0294700
Os03g0295400
Os03g0296200
Os03g0296700
Os03g0296800
Os03g0297700
Os03g0298300
Os03g0298800
Os03g0300900
Os03g0301200
Os03g0301700
Os03g0302000
Os03g0302100
Os03g0303100
Os03g0304100
Os03g0305450
Os03g0305500
Os03g0306200
Os03g0306700
Os03g0306900
Os03g0307000
Os03g0307200
Os03g0307300
Os03g0307900
Os03g0308100
Os03g0308200
Os03g0308850
Os03g0308900
Os03g0314400
Os03g0319000
Os03g0322200
Os03g0322800
Os03g0322900
Os03g0323600
Os03g0324300
Os03g0324600
Os03g0324800
Os03g0324900
Os03g0325400
Os03g0325600
Os03g0326000
Os03g0326100
Os03g0326300
Os03g0326500
Os03g0327100
Os03g0327700
Os03g0327751
Os03g0332400
Os03g0332500
Os03g0332600
Os03g0332700
Os03g0332900
Os03g0333000
Os03g0333050
Os03g0333100
Os03g0333400
Os03g0334000
Os03g0334300
Os03g0334800
Os03g0336700
Os03g0337500
Os03g0338200
Os03g0339400
Os03g0340601
Os03g0340700
Os03g0340900
Os03g0341000
Os03g0341200
Os03g0342850
Os03g0342900
Os03g0343400
Os03g0346150
Os03g0346800
Os03g0347500
Os03g0347800
Os03g0348800
Os03g0348900
Os03g0350100
Os03g0351200
Os03g0351300
Os03g0351700
Os03g0353000
Os03g0353300
Os03g0356300
Os03g0356414
Os03g0358200
Os03g0360700
Os03g0364700
Os03g0365850
Os03g0365900
Os03g0367900
Os03g0369800
Os03g0372700
Os03g0374400
Os03g0374575
Os03g0375200
Os03g0376000
Os03g0376600
Os03g0377600
Os03g0377700
Os03g0381500
Os03g0382350
Os03g0386500
Os03g0387300
Os03g0387500
Os03g0388000
Os03g0388900
Os03g0389100
Os03g0389501
Os03g0389900
Os03g0390000
Os03g0397500
Os03g0397700
Os03g0399000
Os03g0399600
Os03g0399900
Os03g0401100
Os03g0402200
Os03g0405500
Os03g0405900
Os03g0406250
Os03g0406900
Os03g0409100
Os03g0411500
Os03g0412900
Os03g0413100
Os03g0416350
Os03g0416500
Os03g0418600
Os03g0419100
Os03g0421800
Os03g0423300
Os03g0423850
Os03g0425000
Os03g0425300
Os03g0428800
Os03g0429800
Os03g0430000
Os03g0431200
Os03g0431500
Os03g0431600
Os03g0431800
Os03g0432100
Os03g0432666
Os03g0437100
Os03g0437200
Os03g0438400
Os03g0439000
Os03g0439500
Os03g0439700
Os03g0441000
Os03g0448600
Os03g0452300
Os03g0453800
Os03g0454300
Os03g0554900
Os03g0557900
Os03g0561283
Os03g0561400
Os03g0563100
Os03g0563200
Os03g0568500
Os03g0569900
Os03g0570200
Os03g0572250
Os03g0575700
Os03g0578300
Os03g0581701
Os03g0582000
Os03g0584050
Os03g0584400
Os03g0586500
Os03g0586600
Os03g0586700
Os03g0591700
Os03g0594400
Os03g0595300
Os03g0599600
Os03g0602600
Os03g0605300
Os03g0607200
Os03g0607800
Os03g0608600
Os03g0609400
Os03g0610650
Os03g0610800
Os03g0610900
Os03g0614901
Os03g0619600
Os03g0619800
Os03g0621400
Os03g0622700
Os03g0623100
Os03g0624300
Os03g0624800
Os03g0625300
Os03g0625800
Os03g0636800
Os03g0637600
Os03g0637800
Os03g0638200
Os03g0638400
Os03g0639800
Os03g0640000
Os03g0643433
Os03g0644000
Os03g0644600
Os03g0645900
Os03g0648100
Os03g0648300
Os03g0650400
Os03g0650800
Os03g0650850
Os03g0655300
Os03g0655400
Os03g0656201
Os03g0656500
Os03g0656900
Os03g0657400
Os03g0659200
Os03g0659233
Os03g0659300
Os03g0660000
Os03g0660050
Os03g0660700
Os03g0663400
Os03g0663750
Os03g0664600
Os03g0667500
Os03g0668000
Os03g0670000
Os03g0673400
Os03g0674300
Os03g0676300
Os03g0676400
Os03g0684500
Os03g0684700
Os03g0684800
Os03g0685000
Os03g0685100
Os03g0685300
Os03g0686500
Os03g0686900
Os03g0688250
Os03g0689400
Os03g0690600
Os03g0691050
Os03g0693000
Os03g0696000
Os03g0696300
Os03g0698400
Os03g0699000
Os03g0700450
Os03g0701100
Os03g0701200
Os03g0701400
Os03g0701500
Os03g0701600
Os03g0703300
Os03g0704000
Os03g0707900
Os03g0708000
Os03g0708200
Os03g0708750
Os03g0710700
Os03g0712400
Os03g0712600
Os03g0712900
Os03g0713200
Os03g0717900
Os03g0718800
Os03g0719300
Os03g0719400
Os03g0719900
Os03g0720800
Os03g0721200
Os03g0723000
Os03g0723600
Os03g0723700
Os03g0724300
Os03g0724500
Os03g0724700
Os03g0725050
Os03g0725100
Os03g0725200
Os03g0726400
Os03g0726800
Os03g0726900
Os03g0728100
Os03g0728500
Os03g0729600
Os03g0729700
Os03g0730400
Os03g0731050
Os03g0733000
Os03g0734100
Os03g0734200
Os03g0734300
Os03g0734500
Os03g0735400
Os03g0736600
Os03g0737300
Os03g0737701
Os03g0741600
Os03g0741700
Os03g0744600
Os03g0745000
Os03g0745200
Os03g0745500
Os03g0745700
Os03g0746700
Os03g0748000
Os03g0748700
Os03g0750000
Os03g0750100
Os03g0751400
Os03g0752100
Os03g0753600
Os03g0754300
Os03g0758100
Os03g0758300
Os03g0758700
Os03g0760100
Os03g0761100
Os03g0761300
Os03g0761900
Os03g0762300
Os03g0762400
Os03g0762500
Os03g0765400
Os03g0767000
Os03g0767500
Os03g0767700
Os03g0769050
Os03g0769100
Os03g0769500
Os03g0769600
Os03g0769700
Os03g0769800
Os03g0769900
Os03g0770000
[truncated: 3,235 more rows]
